# Supplementary material for: AIMP2-DX2 provides therapeutic interface to control KRAS-driven tumorigenesis
Source: PubMed Central journal article supplement (PMC9095880; doi:10.1038/s41467-022-30149-2), 2022-05-11
Supplement: 41467_2022_30149_MOESM1_ESM.pdf [file 41467_2022_30149_MOESM1_ESM.pdf]

## Supplementary information

### **AIMP2-DX2 provides therapeutic interface to control KRAS-driven tumorigenesis**

Dae Gyu Kim, Yongseok Choi, Yuno Lee, Semi Lim, Jiwon Kong, JaeHa Song, Younah Roh, Dipesh S. Harmalkar, Kwanshik Lee, Ja-il Goo, Hye Young Cho, Ameerq Ul Mushtaq, Jihye Lee, Song Hwa Park, Doyeun Kim, Byung Soh Min, Kang Young Lee, Young Ho Jeon, Sunkyung Lee, Kyeong Lee\*, & Sunghoon Kim\*

\*Correspondence

kaylee@dongguk.edu (K.L.), and sunghoonkim@yonsei.ac.kr (S.K.)

## **Supplementary information include:**

### **Supplementary tables**

Supplementary table 1. KRAS mutation status

Supplementary table 2. List of the DX2 top200 interactome

Supplementary table 3. Distance and interaction type of binding residues between DX2 and KRAS4B obtained from the representative snapshot at 533.7 ns

### **Supplementary figures**

Supplementary Fig. 1 DX2-dependent regulation of KRAS, but not of NRAS and HRAS

Supplementary Fig. 2 Role of DX2 in KRAS-mediated cancer progression and positive association of the levels of two proteins in different cancers

Supplementary Fig. 3 Specific binding between DX2 and KRAS, but not NRAS and HRAS

Supplementary Fig. 4 Determination of the domain responsible for the binding of DX2 with KRAS

Supplementary Fig. 5 Determination of the binding mode of DX2 with KRAS

Supplementary Fig. 6 Determination of the KRAS status for DX2 binding

Supplementary Fig. 7 Identification of specific E3 ligase, Smurf2, against KRAS

Supplementary Fig. 8 Smurf2-mediated ubiquitination of KRAS

Supplementary Fig. 9 Analysis of EGF-dependent binding kinetics of KRAS and DX2

Supplementary Fig. 10 Identification of the ubiquitination sites of KRAS

Supplementary Fig. 11 Screening of the DX2-KRAS interaction inhibitor

Supplementary Fig. 12 Suppression of the cell viability in a DX2-dependent manner via BC-DXI-32982

Supplementary Fig. 13 Determination of the suppressive mode of action of BC-DXI-32982 on the DX2-KRAS binding

Supplementary Fig. 14 Scheme 1 for synthesis of BC-DXI-32982 and Biotin-32982 #1<sup>a</sup>

Supplementary Fig. 15 Scheme 2 for synthesis of Biotin-32982 #2<sup>a</sup>

### **Supplementary Notes**

Supplementary Note 1 Pharmacokinetics and in vivo toxicity of BC-DXI-32982

Supplementary Note 2 Procedure of chemical synthesis

**Supplementary Table 1. KRAS mutation status**

| <b>Organ</b> | <b>Cell line</b> | <b>KRAS mutation status</b> |
|--------------|------------------|-----------------------------|
| Lung         | H69              | G12S                        |
|              | WI-38            | WT                          |
|              | WI-26            | WT                          |
|              | HCC44            | G12C                        |
|              | H1975            | WT                          |
|              | HCC2108          | WT                          |
|              | H1299            | WT                          |
|              | H1666            | WT                          |
|              | H1792            | G12C                        |
|              | Calu-6           | Q61K                        |
|              | H226             | WT                          |
|              | H441             | G12V                        |
|              | A549             | G12S                        |
|              | HCC827           | WT                          |
|              | H1650            | WT                          |
|              | H520             | WT                          |
|              | HCC1588          | WT                          |
|              | H460             | Q61H                        |
| Colon        | HCT-116          | G13D                        |
|              | CCD18CO          | WT                          |
|              | COLO-205         | WT                          |
|              | KM-12            | WT                          |
|              | HCT-8            | WT                          |
|              | SNU-C4           | WT                          |
|              | CaCo2            | WT                          |
|              | LoVo             | G13D                        |
|              | DLD-1            | G13D                        |
|              | SW-403           | G12V                        |
|              | SNU-407          | G12D                        |
|              | H747             | G13D                        |
| Pancreas     | SNU-410          | G12V                        |
|              | BxPC3            | WT                          |
|              | AsPC-1           | G12D                        |
|              | Panc10.05        | G12D                        |
|              | Panc1            | G12D                        |
|              | SU.86.86         | G12D                        |
|              | MIA-PaCa2        | G12C                        |
|              | CFPAC-1          | G12V                        |

## Supplementary Table 2. List of the DX2 top200 interactome

|    | Protein                                                                    | Gene     | Relative value of fold change (DX2/EV) |
|----|----------------------------------------------------------------------------|----------|----------------------------------------|
| 1  | Isoform 1 of Heterogeneous nuclear ribonucleoprotein M                     | HNRNPM   | 1                                      |
| 2  | Tubulin alpha-1A chain                                                     | TUBA1A   | 0.596059113                            |
| 3  | Putative elongation factor 1-alpha-like 3                                  | EEF1A1P5 | 0.507389163                            |
| 4  | Ubiquitin C splice variant                                                 | UBC      | 0.448275862                            |
| 5  | cDNA FLJ53312, highly similar to Heterogeneous nuclear ribonucleoprotein K | HNRNPK   | 0.428571429                            |
| 6  | CTP synthase 1                                                             | CTPS1    | 0.428571429                            |
| 7  | Isoform 1 of Polypyrimidine tract-binding protein 1                        | PTBP1    | 0.428571429                            |
| 8  | ATP-dependent RNA helicase DDX3X                                           | DDX3X    | 0.418719212                            |
| 9  | Isoform Somatic-1 of Angiotensin-converting enzyme                         | ACE      | 0.379310345                            |
| 10 | cDNA FLJ53366, highly similar to Probable ATP-dependent RNA helicase DDX5  | DDX5     | 0.379310345                            |
| 11 | Actin, cytoplasmic 1                                                       | ACTB     | 0.379310345                            |
| 12 | Isoform 3 of Plasminogen activator inhibitor 1 RNA-binding protein         | SERBP1   | 0.369458128                            |
| 13 | Elongation factor 2                                                        | EEF2     | 0.359605911                            |
| 14 | filamin A, alpha (actin binding protein 280)                               | FLNA     | 0.359605911                            |
| 15 | Hornerin                                                                   | HRNR     | 0.359605911                            |
| 16 | Vimentin                                                                   | VIM      | 0.339901478                            |
| 17 | heterogeneous nuclear ribonucleoprotein H1 (H)                             | HNRNPH1  | 0.330049261                            |
| 18 | matrin 3                                                                   | MATR3    | 0.330049261                            |
| 19 | Isoform alpha-enolase of Alpha-enolase                                     | ENO1     | 0.320197044                            |
| 20 | CCT2                                                                       | CCT2     | 0.320197044                            |
| 21 | 40S ribosomal protein S3                                                   | RPS3     | 0.320197044                            |
| 22 | Isoform 1 of Heat shock cognate 71 kDa protein                             | HSPA8    | 0.310344828                            |
| 23 | Tubulin beta chain                                                         | TUBB     | 0.300492611                            |
| 24 | Isoform 1 of Heat shock protein HSP 90-alpha                               | HSP90AA1 | 0.300492611                            |
| 25 | Heterogeneous nuclear ribonucleoprotein L                                  | HNRNPL   | 0.300492611                            |
| 26 | Isoform 2 of Annexin A2                                                    | ANXA2    | 0.290640394                            |
| 27 | NUP153 variant protein (Fragment)                                          | NUP153   | 0.290640394                            |
| 28 | ATP-citrate synthase                                                       | ACLY     | 0.290640394                            |
| 29 | Peroxiredoxin-1                                                            | PRDX1    | 0.270935961                            |
| 30 | Isoform 1 of RNA-binding protein 14                                        | RBM14    | 0.270935961                            |
| 31 | GTP-binding nuclear protein Ran                                            | RAN      | 0.270935961                            |
| 32 | Isoform 1 of Ubiquitin-associated protein 2-like                           | UBAP2L   | 0.270935961                            |
| 33 | Isoleucyl-tRNA synthetase, cytoplasmic                                     | IARS1    | 0.261083744                            |
| 34 | Ubiquitin-like modifier-activating enzyme 1                                | UBA1     | 0.261083744                            |
| 35 | Phenylalanyl-tRNA synthetase alpha chain                                   | FARSA    | 0.251231527                            |
| 36 | Cytochrome b-c1 complex subunit 2, mitochondrial                           | UQCRC2   | 0.251231527                            |
| 37 | pyruvate kinase isozymes M1/M2 isoform c                                   | PKM      | 0.251231527                            |
| 38 | Isoform 1 of Nucleophosmin                                                 | NPM1     | 0.251231527                            |
| 39 | C-1-tetrahydrofolate synthase, cytoplasmic                                 | MTHFD1   | 0.24137931                             |
| 40 | Isoform Long of Trifunctional purine biosynthetic protein adenosine-3      | GART     | 0.231527094                            |
| 41 | cDNA FLJ54020, highly similar to Heterogeneous nuclear ribonucleoprotein U | HNRNPU   | 0.221674877                            |
| 42 | eukaryotic initiation factor 4A-I isoform 2                                | EIF4A1   | 0.221674877                            |
| 43 | cDNA FLJ52364, highly similar to Heat-shock protein 105 kDa                | HSPH1    | 0.221674877                            |
| 44 | GMP synthase [glutamine-hydrolyzing]                                       | GMPS     | 0.221674877                            |
| 45 | ATP synthase subunit alpha, mitochondrial                                  | ATP5F1A  | 0.21182266                             |
| 46 | cDNA FLJ60076, highly similar to ELAV-like protein 1                       | ELAVL1   | 0.21182266                             |
| 47 | Guanine nucleotide-binding protein subunit beta-2-like 1                   | GNB2L1   | 0.201970443                            |
| 48 | Cip1-interacting zinc finger protein                                       | CIZ1     | 0.201970443                            |
| 49 | Importin-5                                                                 | IPO5     | 0.192118227                            |
| 50 | cDNA FLJ50873, highly similar to DNA replication licensing factor MCM3     | MCM3     | 0.18226601                             |

\* The protein is sorted according to the relative value of fold change (DX2/EV)

## Supplementary Table 2. List of the DX2 top200 interactome

|     | Protein                                                                                                  | Gene      | Relative value of fold change (DX2/EV) |
|-----|----------------------------------------------------------------------------------------------------------|-----------|----------------------------------------|
| 51  | Hypoxanthine-guanine phosphoribosyltransferase                                                           | HPRT1     | 0.18226601                             |
| 52  | cDNA FLJ56389, highly similar to Elongation factor 1-gamma                                               | EEF1G     | 0.18226601                             |
| 53  | Cofilin-1                                                                                                | CFL1      | 0.18226601                             |
| 54  | Stress-70 protein, mitochondrial                                                                         | HSPA9     | 0.172413793                            |
| 55  | Isoform DPI of Desmoplakin                                                                               | DSP       | 0.172413793                            |
| 56  | Heat shock protein HSP 90-beta                                                                           | HSP90AB1  | 0.162561576                            |
| 57  | Exportin-1                                                                                               | XPO1      | 0.162561576                            |
| 58  | Peroxiredoxin-2                                                                                          | PRDX2     | 0.162561576                            |
| 59  | Poly(rC)-binding protein 1                                                                               | PCBP1     | 0.15270936                             |
| 60  | ATP synthase subunit beta, mitochondrial                                                                 | ATP5F1B   | 0.15270936                             |
| 61  | similar to chaperonin containing TCP1, subunit 8 (theta); chaperonin containing T CP1, subunit 8 (theta) | CCT8      | 0.15270936                             |
| 62  | Glyceraldehyde-3-phosphate dehydrogenase                                                                 | GAPDH     | 0.15270936                             |
| 63  | transgelin 2                                                                                             | TAGLN2    | 0.15270936                             |
| 64  | Isoform 1 of Cullin-associated NEDD8-dissociated protein 1                                               | CAND1     | 0.142857143                            |
| 65  | Isoform 1 of Transcription intermediary factor 1-beta                                                    | TRIM28    | 0.142857143                            |
| 66  | Heterogeneous nuclear ribonucleoprotein F                                                                | HNRNPF    | 0.142857143                            |
| 67  | Glycyl-tRNA synthetase                                                                                   | GARS1     | 0.133004926                            |
| 68  | Tubulin alpha-1C chain                                                                                   | TUBA1C    | 0.133004926                            |
| 69  | poly(rC)-binding protein 2 isoform b                                                                     | PCBP2     | 0.133004926                            |
| 70  | Isoform 1 of Far upstream element-binding protein 2                                                      | KHSRP     | 0.133004926                            |
| 71  | dynamamin-like 120 kDa protein, mitochondrial isoform 3                                                  | OPA1      | 0.133004926                            |
| 72  | Importin-7                                                                                               | IPO7      | 0.133004926                            |
| 73  | Nucleolin                                                                                                | NCL       | 0.133004926                            |
| 74  | Tubulin beta-2C chain                                                                                    | TUBB2     | 0.123152709                            |
| 75  | Isoform 4 of Double-stranded RNA-specific adenosine deaminase                                            | ADAR      | 0.123152709                            |
| 76  | Isoform Cytoplasmic of Glutathione reductase, mitochondrial                                              | GSR       | 0.123152709                            |
| 77  | T-complex protein 1 subunit delta                                                                        | CCT4      | 0.123152709                            |
| 78  | Importin subunit beta-1                                                                                  | KPNB1     | 0.123152709                            |
| 79  | Isoform Monomeric of Arginyl-tRNA synthetase, cytoplasmic                                                | RARS1     | 0.113300493                            |
| 80  | elongation factor Tu, mitochondrial precursor                                                            | TUFM      | 0.113300493                            |
| 81  | Glutathione S-transferase Mu 3                                                                           | GSTM3     | 0.113300493                            |
| 82  | Cysteine and glycine-rich protein 2                                                                      | CSRP2     | 0.113300493                            |
| 83  | Importin subunit alpha-2                                                                                 | KPNA2     | 0.113300493                            |
| 84  | T-complex protein 1 subunit eta                                                                          | CCT7      | 0.113300493                            |
| 85  | Phosphoribosylformylglycinamide synthase                                                                 | PFAS      | 0.113300493                            |
| 86  | Interleukin enhancer-binding factor 2                                                                    | ILF2      | 0.113300493                            |
| 87  | Isoform Long of Sodium/potassium-transporting ATPase subunit alpha-1                                     | ATP1A1    | 0.113300493                            |
| 88  | Isoform 1 of Importin-4                                                                                  | IPO4      | 0.113300493                            |
| 89  | Isoform 2A of GTPase KRas                                                                                | KRAS      | 0.113300493                            |
| 90  | Protein disulfide-isomerase A6                                                                           | PDIA6     | 0.103448276                            |
| 91  | Isoform 3 of Exportin-2                                                                                  | CSE1L     | 0.103448276                            |
| 92  | D-3-phosphoglycerate dehydrogenase                                                                       | PHGDH     | 0.103448276                            |
| 93  | Isoform 1 of 14-3-3 protein epsilon                                                                      | YWHAE     | 0.103448276                            |
| 94  | chromosome 14 open reading frame 166                                                                     | c14orf166 | 0.103448276                            |
| 95  | Adenosylhomocysteinase                                                                                   | AHCY      | 0.103448276                            |
| 96  | T-complex protein 1 subunit alpha                                                                        | TCP1      | 0.103448276                            |
| 97  | Isoform 1 of Adenylate kinase 2, mitochondrial                                                           | AK2       | 0.103448276                            |
| 98  | T-complex protein 1 subunit gamma                                                                        | CCT3      | 0.103448276                            |
| 99  | Isoform 1 of Heterogeneous nuclear ribonucleoprotein A3                                                  | HNRNPA3   | 0.103448276                            |
| 100 | Cystatin-A                                                                                               | CSTA      | 0.103448276                            |

\* The protein is sorted according to the relative value of fold change (DX2/EV)

## Supplementary Table 2. List of the DX2 top200 interactome

|     | Protein                                                                                                                                                                                                                                                                                                                                                | Gene    | Relative value of fold change (DX2/EV) |
|-----|--------------------------------------------------------------------------------------------------------------------------------------------------------------------------------------------------------------------------------------------------------------------------------------------------------------------------------------------------------|---------|----------------------------------------|
| 101 | Fatty acid synthase                                                                                                                                                                                                                                                                                                                                    | FASN    | 0.103448276                            |
| 102 | Nuclear pore complex protein Nup93                                                                                                                                                                                                                                                                                                                     | NUP93   | 0.103448276                            |
| 103 | mRNA export factor                                                                                                                                                                                                                                                                                                                                     | RAE1    | 0.103448276                            |
| 104 | Isoform 4 of Interleukin enhancer-binding factor 3                                                                                                                                                                                                                                                                                                     | ILF3    | 0.103448276                            |
| 105 | Transitional endoplasmic reticulum ATPase                                                                                                                                                                                                                                                                                                              | VCP     | 0.103448276                            |
| 106 | aldolase A, fructose-bisphosphate                                                                                                                                                                                                                                                                                                                      | ALDOA   | 0.093596059                            |
| 107 | ribosomal protein SA pseudogene 9; ribosomal protein SA pseudogene 8; ribosomal protein SA pseudogene 58; ribosomal protein SA pseudogene 19; ribosomal protein SA pseudogene 18; ribosomal protein SA; ribosomal protein SA pseudogene 15; ribosomal protein SA pseudogene 61; ribosomal protein SA pseudogene 29; ribosomal protein SA pseudogene 12 | RPSA    | 0.093596059                            |
| 108 | triosephosphate isomerase isoform 2                                                                                                                                                                                                                                                                                                                    | TPI1    | 0.093596059                            |
| 109 | soform 2 of DNA replication licensing factor MCM7                                                                                                                                                                                                                                                                                                      | MCM7    | 0.093596059                            |
| 110 | cDNA FLJ53863, highly similar to Cystathionine beta-synthase                                                                                                                                                                                                                                                                                           | CBS     | 0.093596059                            |
| 111 | 40S ribosomal protein S20                                                                                                                                                                                                                                                                                                                              | RPS20   | 0.093596059                            |
| 112 | Isoform 1 of DNA-dependent protein kinase catalytic subunit                                                                                                                                                                                                                                                                                            | PRKDC   | 0.093596059                            |
| 113 | 14-3-3 protein zeta/delta                                                                                                                                                                                                                                                                                                                              | YWHAZ   | 0.093596059                            |
| 114 | Isoform 1 of 3'(2'),5'-bisphosphate nucleotidase 1                                                                                                                                                                                                                                                                                                     | BPNT1   | 0.093596059                            |
| 115 | Isoform 2 of Heterogeneous nuclear ribonucleoprotein A1                                                                                                                                                                                                                                                                                                | HNRNPA1 | 0.093596059                            |
| 116 | Aspartidyl-tRNA synthetase, cytoplasmic                                                                                                                                                                                                                                                                                                                | DARS1   | 0.083743842                            |
| 117 | Protease serine 1 (Trypsin-1)                                                                                                                                                                                                                                                                                                                          | PRSS1   | 0.083743842                            |
| 118 | DnaJ homolog subfamily C member 7                                                                                                                                                                                                                                                                                                                      | DNAJC7  | 0.083743842                            |
| 119 | 40S ribosomal protein S4, X isoform                                                                                                                                                                                                                                                                                                                    | RPS4X   | 0.083743842                            |
| 120 | Puromycin-sensitive aminopeptidase                                                                                                                                                                                                                                                                                                                     | NPEPPS  | 0.083743842                            |
| 121 | Heat shock 70 kDa protein 1A/1B                                                                                                                                                                                                                                                                                                                        | HSPA1A  | 0.083743842                            |
| 122 | similar to RAN binding protein 1; RAN binding protein 1                                                                                                                                                                                                                                                                                                | RANBP1  | 0.083743842                            |
| 123 | protein-L-isoaspartate (D-aspartate) O-methyltransferase                                                                                                                                                                                                                                                                                               | PCMT1   | 0.083743842                            |
| 124 | Ras-related protein Rab-14                                                                                                                                                                                                                                                                                                                             | RAB14   | 0.083743842                            |
| 125 | Glutathione S-transferase P                                                                                                                                                                                                                                                                                                                            | GSTP1   | 0.083743842                            |
| 126 | T-complex protein 1 subunit epsilon                                                                                                                                                                                                                                                                                                                    | CCT5    | 0.083743842                            |
| 127 | Tubulin beta-3 chain                                                                                                                                                                                                                                                                                                                                   | TUBB3   | 0.083743842                            |
| 128 | Histone H2A type 1-B/E                                                                                                                                                                                                                                                                                                                                 | H2AC4   | 0.083743842                            |
| 129 | Isoform 1 of RuvB-like 1                                                                                                                                                                                                                                                                                                                               | RUVBL1  | 0.083743842                            |
| 130 | 26S proteasome non-ATPase regulatory subunit 2                                                                                                                                                                                                                                                                                                         | PSMD2   | 0.083743842                            |
| 131 | Desmoglein-1                                                                                                                                                                                                                                                                                                                                           | DSG1    | 0.083743842                            |
| 132 | Putative transferase CAF17, mitochondrial                                                                                                                                                                                                                                                                                                              | IBA57   | 0.083743842                            |
| 133 | Peptidyl-prolyl cis-trans isomerase A                                                                                                                                                                                                                                                                                                                  | PPIA    | 0.083743842                            |
| 134 | Pre-mRNA-splicing factor ATP-dependent RNA helicase DHX15                                                                                                                                                                                                                                                                                              | DHX15   | 0.083743842                            |
| 135 | Parkinson disease (autosomal recessive, early onset) 7                                                                                                                                                                                                                                                                                                 | PARK7   | 0.083743842                            |
| 136 | Leucyl-tRNA synthetase                                                                                                                                                                                                                                                                                                                                 | LARS1   | 0.073891626                            |
| 137 | 14-3-3 protein theta                                                                                                                                                                                                                                                                                                                                   | YWHAQ   | 0.073891626                            |
| 138 | 60S acidic ribosomal protein P0                                                                                                                                                                                                                                                                                                                        | RPLP0   | 0.073891626                            |
| 139 | Endoplasmic                                                                                                                                                                                                                                                                                                                                            | HSP90B1 | 0.073891626                            |
| 140 | 40S ribosomal protein S2                                                                                                                                                                                                                                                                                                                               | RPS2    | 0.073891626                            |
| 141 | Leucine-rich PPR motif-containing protein, mitochondrial                                                                                                                                                                                                                                                                                               | LRPPRC  | 0.073891626                            |
| 142 | Serine/threonine-protein phosphatase PP1-beta catalytic subunit                                                                                                                                                                                                                                                                                        | PPP1CB  | 0.073891626                            |
| 143 | Cell division cycle 2, G1 to S and G2 to M, isoform CRA_a                                                                                                                                                                                                                                                                                              | CDK1    | 0.073891626                            |
| 144 | Translin                                                                                                                                                                                                                                                                                                                                               | TSN     | 0.073891626                            |
| 145 | cDNA FLJ32936 fis, clone TESTI2007533, highly similar to RuvB-like 2                                                                                                                                                                                                                                                                                   | RUVBL2  | 0.073891626                            |
| 146 | Ubiquitinyl hydrolase 1                                                                                                                                                                                                                                                                                                                                | OTUB1   | 0.073891626                            |
| 147 | von Hippel-Lindau binding protein 1, isoform CRA_b                                                                                                                                                                                                                                                                                                     | VBP1    | 0.073891626                            |
| 148 | cDNA FLJ55072, highly similar to Succinate dehydrogenase (ubiquinone) flavoprotein subunit, mitochondrial                                                                                                                                                                                                                                              | SDHA    | 0.073891626                            |
| 149 | glutathione S-transferase mu 2 (muscle)                                                                                                                                                                                                                                                                                                                | GSTM2   | 0.073891626                            |
| 150 | Translation initiation factor eIF-2B subunit alpha                                                                                                                                                                                                                                                                                                     | EIF2B1  | 0.073891626                            |

\* The protein is sorted according to the relative value of fold change (DX2/EV)

## Supplementary Table 2. List of the DX2 top200 interactome

|     | Protein                                                                                 | Gene      | Relative value of fold change (DX2/EV) |
|-----|-----------------------------------------------------------------------------------------|-----------|----------------------------------------|
| 151 | Inosine-5'-monophosphate dehydrogenase 2                                                | IMPDH2    | 0.073891626                            |
| 152 | DnaJ homolog subfamily A member 1                                                       | DNAJA1    | 0.073891626                            |
| 153 | Sideroflexin-1                                                                          | SFXN1     | 0.073891626                            |
| 154 | 60S ribosomal protein L11                                                               | RPL11     | 0.073891626                            |
| 155 | Dermcidin                                                                               | DCD       | 0.073891626                            |
| 156 | peptidase (mitochondrial processing) beta                                               | PMPCB     | 0.073891626                            |
| 157 | Isoform 1AB of Catenin delta-1                                                          | CTNND1    | 0.073891626                            |
| 158 | Isoform 7 of Titin                                                                      | TTN       | 0.064039409                            |
| 159 | Isoform 1 of Mitotic checkpoint protein BUB3                                            | BUB3      | 0.064039409                            |
| 160 | S-adenosylmethionine synthase isoform type-2                                            | MAT2A     | 0.064039409                            |
| 161 | High mobility group protein B1                                                          | HMGB1     | 0.064039409                            |
| 162 | Thioredoxin-dependent peroxide reductase, mitochondrial                                 | PRDX3     | 0.064039409                            |
| 163 | Nuclear migration protein nudC                                                          | NUDC      | 0.064039409                            |
| 164 | ATP synthase gamma chain                                                                | ATPC1     | 0.064039409                            |
| 165 | Isoform B1 of Heterogeneous nuclear ribonucleoproteins A2/B1                            | HNRNPA2B1 | 0.064039409                            |
| 166 | Cytochrome b-c1 complex subunit 1, mitochondrial                                        | UQCRC1    | 0.064039409                            |
| 167 | Multifunctional protein ADE2                                                            | PAICS     | 0.064039409                            |
| 168 | Serine/threonine-protein phosphatase 2A catalytic subunit alpha isoform                 | PPP2CA    | 0.064039409                            |
| 169 | Tyrosine-protein kinase CSK                                                             | CSK       | 0.064039409                            |
| 170 | X-ray repair complementing defective repair in Chinese hamster cells 6                  | XRCC6     | 0.064039409                            |
| 171 | cDNA FLJ59758, highly similar to S-methyl-5-thioadenosine phosphorylase                 | MTAP      | 0.064039409                            |
| 172 | Heterogeneous nuclear ribonucleoprotein H2                                              | HNRNPH2   | 0.064039409                            |
| 173 | Microtubule-associated protein                                                          | MAP4      | 0.064039409                            |
| 174 | Heterogeneous nuclear ribonucleoprotein A0                                              | HNRNPA0   | 0.064039409                            |
| 175 | Importin-9                                                                              | IPO9      | 0.064039409                            |
| 176 | Proteasome 26S non-ATPase subunit 11 variant (Fragment)                                 | PSMD11    | 0.064039409                            |
| 177 | Isoform 2 of N-alpha-acetyltransferase 15, NatA auxiliary subunit                       | NAA15     | 0.064039409                            |
| 178 | Isoform 1 of Alpha-ketoglutarate-dependent dioxygenase FTO                              | FTO       | 0.064039409                            |
| 179 | Voltage-dependent anion-selective channel protein 2                                     | VDAC2     | 0.064039409                            |
| 180 | Heat shock protein 90Bb                                                                 | HSP90AB2P | 0.064039409                            |
| 181 | Isoform 1 of Zinc finger CCCH-type antiviral protein 1                                  | ZC3HAV1   | 0.064039409                            |
| 182 | Isoform 2 of Nuclear pore complex protein Nup214                                        | NUP214    | 0.064039409                            |
| 183 | methionyl-tRNA synthetase                                                               | MARS1     | 0.054187192                            |
| 184 | Bifunctional glutamate/proline--tRNA ligase                                             | EPRS1     | 0.054187192                            |
| 185 | Isoform 1 of Serine/arginine-rich splicing factor 7                                     | SRSF7     | 0.054187192                            |
| 186 | Heat shock 70 kDa protein 4                                                             | HSPA4     | 0.054187192                            |
| 187 | cDNA PSEC0175 fis, clone OVARC1000169, highly similar to Protein disulfide-isomerase A3 | PDIA3     | 0.054187192                            |
| 188 | Annexin A5                                                                              | ANXA5     | 0.054187192                            |
| 189 | Malate dehydrogenase, mitochondrial                                                     | MDH2      | 0.054187192                            |
| 190 | Stress-induced-phosphoprotein 1                                                         | STIP1     | 0.054187192                            |
| 191 | Nascent polypeptide-associated complex subunit alpha, muscle-specific form              | NACA      | 0.054187192                            |
| 192 | Isoform 2 of TAR DNA-binding protein 43                                                 | TARDBP    | 0.054187192                            |
| 193 | probable ATP-dependent RNA helicase DDX17 isoform 3                                     | DDX17     | 0.054187192                            |
| 194 | abl-interactor 1                                                                        | ABI1      | 0.054187192                            |
| 195 | scaffold attachment factor B1 isoform 2                                                 | SAFB      | 0.054187192                            |
| 196 | Succinate dehydrogenase [ubiquinone] iron-sulfur subunit, mitochondrial                 | SDHB      | 0.054187192                            |
| 197 | 26S protease regulatory subunit 8                                                       | PSMC5     | 0.054187192                            |
| 198 | regulator of chromosome condensation isoform b                                          | RCC1      | 0.054187192                            |
| 199 | 40S ribosomal protein S9                                                                | RPS9      | 0.054187192                            |
| 200 | F-actin-capping protein subunit alpha-1                                                 | CAPZA1    | 0.054187192                            |

\* The protein is sorted according to the relative value of fold change (DX2/EV)

**Supplementary Table 3. Distance and interaction type of binding residues between DX2 and KRAS4B obtained from the representative snapshot at 533.7 ns**

| Receptor Residue | Ligand Residue | Interaction Constituents         | Distance | Type         |
|------------------|----------------|----------------------------------|----------|--------------|
| KRAS:LYS184      | DX2:THR85      | DX2:THR85:HN - KRAS:LYS184:O     | 1.7667   | Conventional |
| KRAS:LYS184      | DX2:THR85      | DX2:THR85:HG1 - KRAS:LYS184:O    | 2.1336   | Conventional |
| KRAS:THR50       | DX2:GLN110     | DX2:GLN110:HE22 - KRAS:THR50:OG1 | 2.5371   | Conventional |
| KRAS:LYS5        | DX2:HIS84      | KRAS:LYS5:HZ2 - DX2:HIS84:NE2    | 2.0757   | Conventional |
| KRAS:ARG41       | DX2:THR117     | KRAS:ARG41:HH22 - DX2:THR117:OG1 | 1.9775   | Conventional |
| KRAS:GLN43       | DX2:GLN110     | KRAS:GLN43:HE21 - DX2:GLN110:O   | 2.2793   | Conventional |
| KRAS:GLN70       | DX2:SER87      | KRAS:GLN70:HE21 - DX2:SER87:O    | 2.4122   | Conventional |
| KRAS:LYS184      | DX2:HIS84      | DX2:HIS84:HA - KRAS:LYS184:O     | 2.8057   | Carbon       |
| KRAS:GLU37       | DX2:HIS86      | DX2:HIS86:HE1 - KRAS:GLU37:OE1   | 2.4054   | Carbon       |
| KRAS:GLN70       | DX2:SER87      | DX2:SER87:HB2 - KRAS:GLN70:O     | 2.7711   | Carbon       |
| KRAS:ASP38       | DX2:LYS129     | DX2:LYS129:HE1 - KRAS:ASP38:OD1  | 2.8895   | Carbon       |
| KRAS:ASP38       | DX2:ILE132     | DX2:ILE132:HA - KRAS:ASP38:OD2   | 2.9666   | Carbon       |
| KRAS:THR50       | DX2:GLN110     | KRAS:THR50:HB - DX2:GLN110:OE1   | 2.5785   | Carbon       |
| KRAS:LYS184      | DX2:VAL83      | KRAS:LYS184:HA - DX2:VAL83:O     | 3.0914   | Carbon       |
| KRAS:LYS184      | DX2:LEU97      | KRAS:LYS184:HE2 - DX2:LEU97:O    | 2.2692   | Carbon       |
| KRAS:CYS185      | DX2:HIS84      | DX2:HIS84 - KRAS:CYS185          | 4.5136   | Pi-Alkyl     |
| KRAS:TYR40       | DX2:ILE132     | KRAS:TYR40 - DX2:ILE132          | 4.961    | Pi-Alkyl     |
| KRAS:MET188*     | DX2:LYS90      | DX2:LYS90:HZ1 - KRAS:MET188:OT2  | 1.5866   | Salt Bridges |
| KRAS:ASP38       | DX2:LYS129     | DX2:LYS129:HZ1 - KRAS:ASP38:OD2  | 1.5702   | Salt Bridges |
| KRAS:LYS182      | DX2:GLU94      | KRAS:LYS182:HZ2 - DX2:GLU94:OE2  | 1.6866   | Salt Bridges |
| KRAS:LYS184      | DX2:GLU102     | KRAS:LYS184:HZ2 - DX2:GLU102:OE2 | 3.239    | Salt Bridges |
| KRAS:LYS184      | DX2:GLU102     | KRAS:LYS184:HZ3 - DX2:GLU102:OE1 | 1.623    | Salt Bridges |

\* KRAS:MET188 is the c-terminal



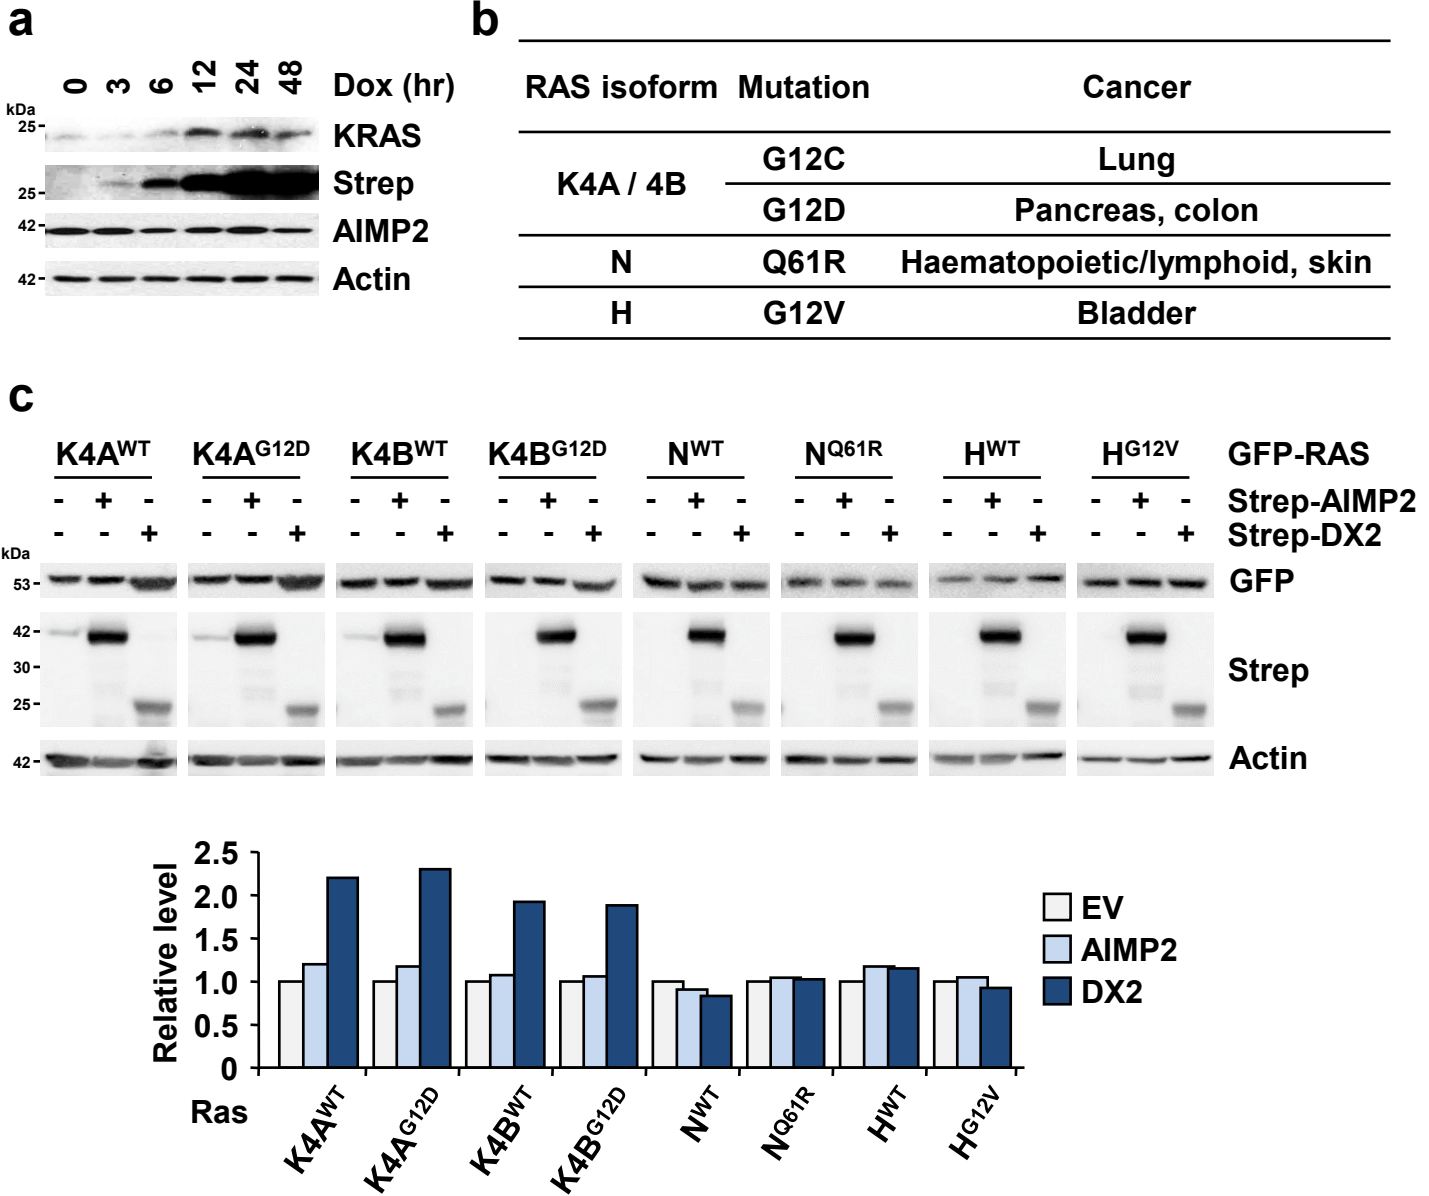

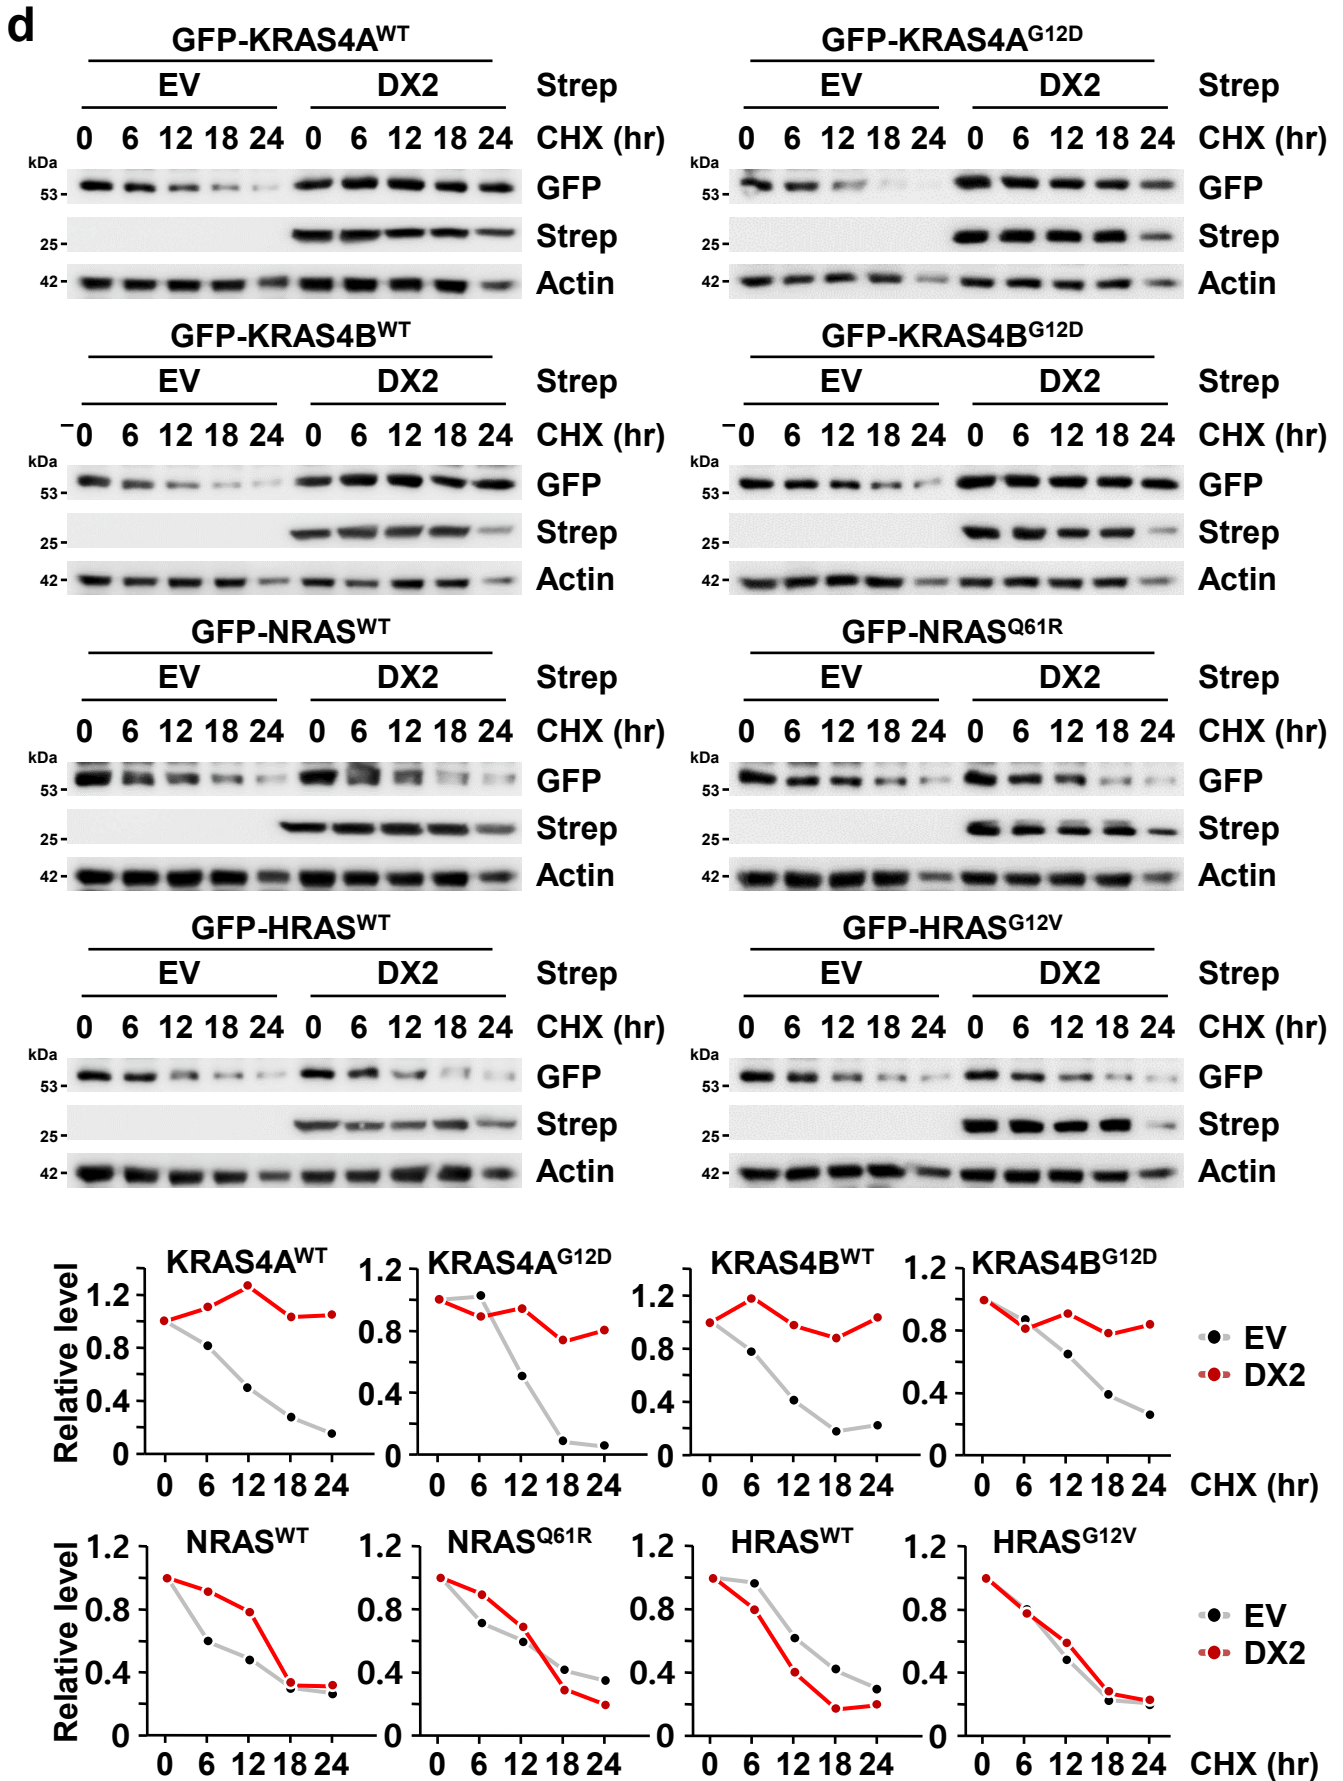

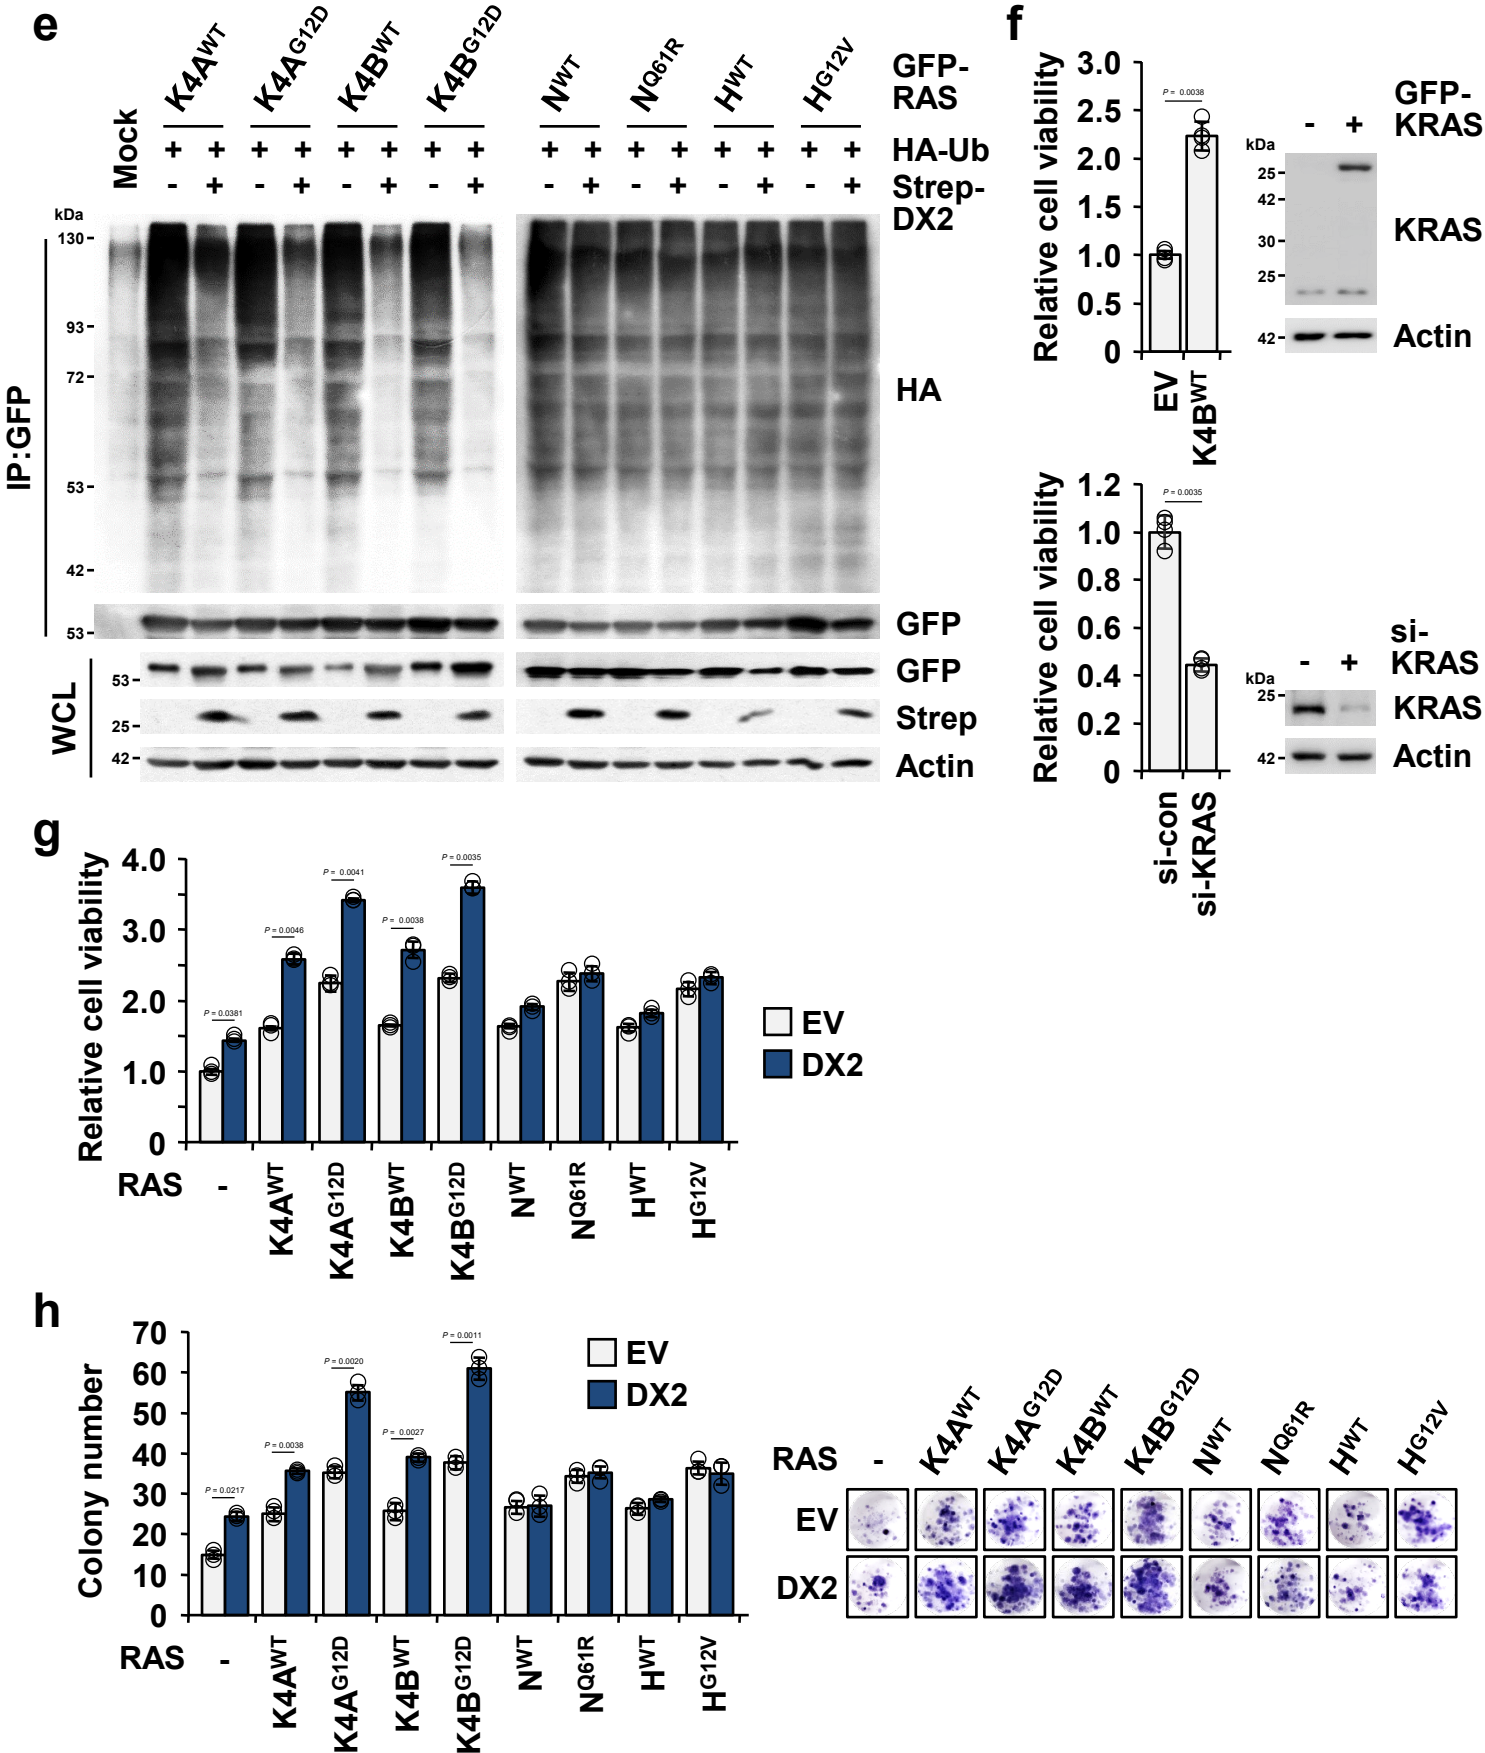

**Supplementary Fig. 1 DX2-dependent regulation of KRAS, but not of NRAS and HRAS.** **a** Strep-DX2-inducible H460 cells were treated by doxycycline (Dox) in a time-dependent manner and cellular levels of DX2, AIMP2, and KRAS were determined by immunoblotting using their specific antibodies. Actin was used as a loading control. **b** RAS isoforms and their different cancer-associated mutations. **c** 293T cells expressing Strep-AIMP2, -DX2, and GFP-RAS isoforms were subjected to SDS-PAGE and immunoblotting. The quantified levels of RAS proteins were presented as a bar graph (bottom). EV denotes “empty vector”. **d** Strep-DX2 and GFP-RAS isoforms in the indicated combination were introduced into A549 cells expressing HSP70. The cells were treated with cycloheximide (CHX) in a time-dependent manner. The levels of RAS proteins were quantified and presented as line graph (bottom). **e** Strep-DX2 was introduced into 293T cells expressing HA-ubiquitin (Ub) and each of the GFP-RAS isoforms. The cells were treated with MG-132 and subjected to immunoprecipitation using the anti-GFP antibody. The amounts of ubiquitinated RAS proteins were determined by immunoblotting with the anti-HA antibody. **f** A549 cells transfected with GFP-KRAS or si-KRAS were subjected to MTT assay to determine the cell viability (left). Exogenous and endogenous levels of KRAS were determined by SDS-PAGE and immunoblotting (right). **g** Strep-DX2 was introduced into CCD18CO cells expressing the indicated GFP-RAS isoforms. Cell viability was measured and represented as above. **h** Cells described above were subjected to an anchorage-independent colony forming assay. The number of colonies is represented as a bar graph (left), and a representative image is shown (right). **c-e, g, h** Results were quantified and are presented as a heatmap in Fig. 1d. **f-h** All the experiments were independently repeated thrice and error bars denote S.D. Data are presented as mean values  $\pm$  S.D. *P*-value is from the two-sided t-test. Source data are provided as a Source data file. **a, c-e** Results are representative of at least three independent experiments.

**a**

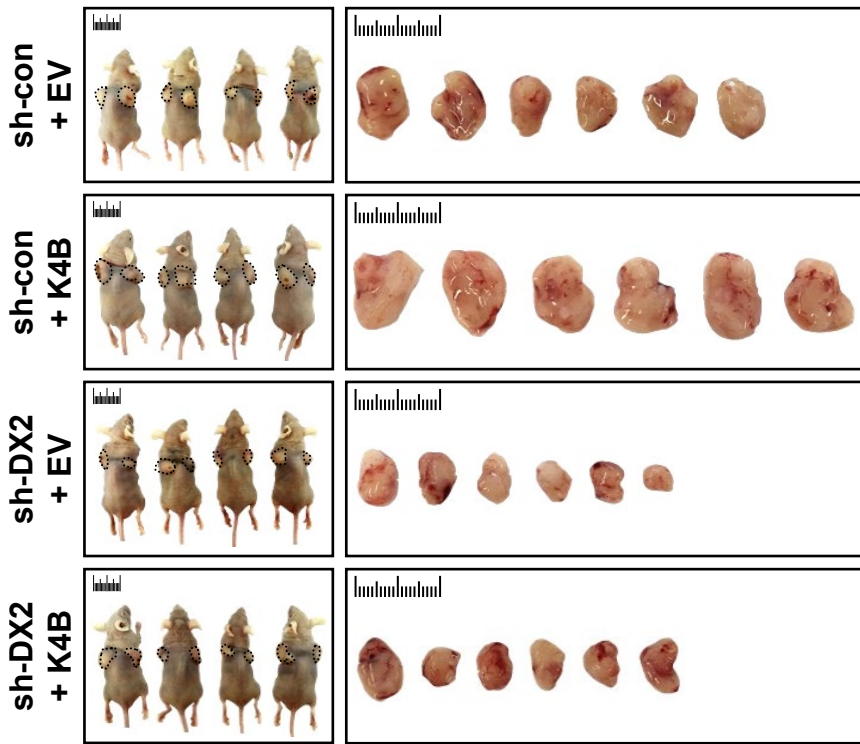

**b**

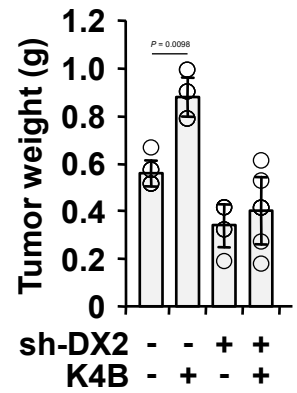

**c**

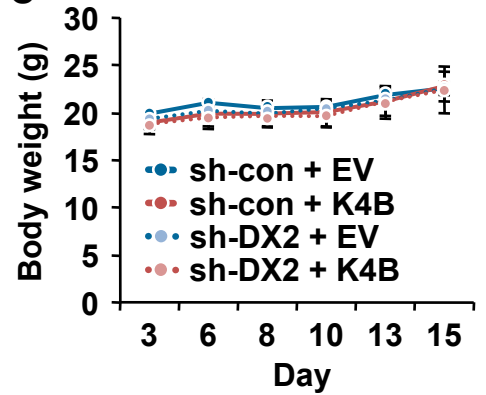

**d**

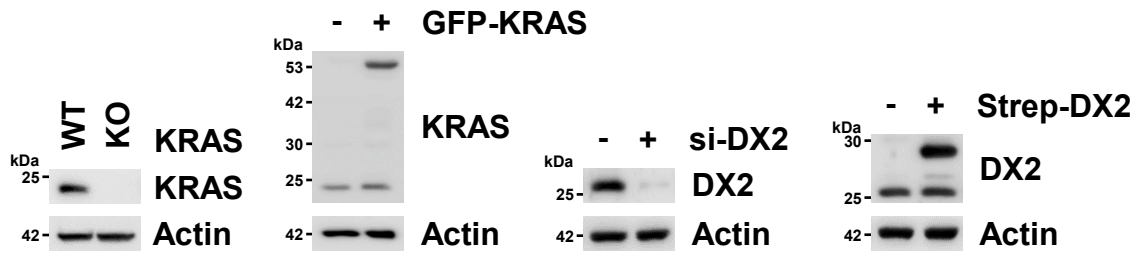

**e**

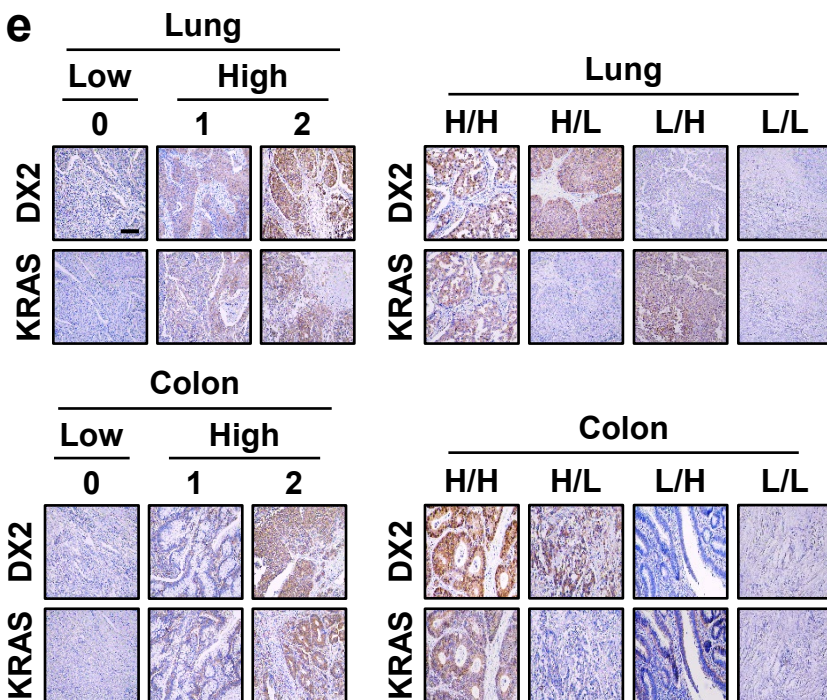

**f**

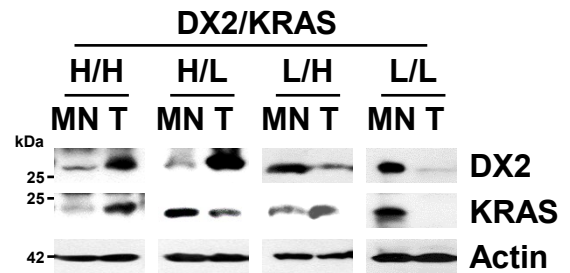

**Supplementary Fig. 2 Role of DX2 in KRAS-mediated cancer progression and positive association of the levels of two proteins in different cancers.** **a-c** H460 cells stably expressing different combinations of KRAS4B and sh-DX2 were xenografted to the backs of nude mice ( $n = 4$ ) and tumor growth was monitored for 15 d (Fig. 1e). Images of the tumor-embedded mice and tumors are shown (**a**). Tumor and body weights were measured and are presented as a bar (**b**) and line (**c**) graph, respectively. All error bars represent the standard deviation (S.D.). *P*-value is from the two-sided t-test. **d** Evaluation of the specific antibody against KRAS and DX2 used for immunohistochemistry (IHC) staining. WT and KO indicate wild type and CRISPR/Cas9-mediated knockout, respectively. Cell lysates were subjected to SDS-PAGE and immunoblotting with the anti-KRAS and DX2 antibodies. **e** Tissue microarray (TMA) slides containing tumors from patients with lung (upper) and colorectal (lower) cancers were subjected to IHC staining to determine the levels of DX2 and KRAS, which were classified as low (0) and high (1 and 2) (left). Representative images for staining are shown (right). The results of the analysis are presented as a Quadrants graph (Fig. 1g). Scale bar = 400  $\mu\text{m}$ . **f** Total protein extracts from the tumor (T) and matched normal (MN) tissues of patients with colorectal cancer were subjected to immunoblotting. The results are shown as a Quadrants graph (Fig. 1h). Source data are provided as a Source data file. **d, f** Results are representative of at least three independent experiments.

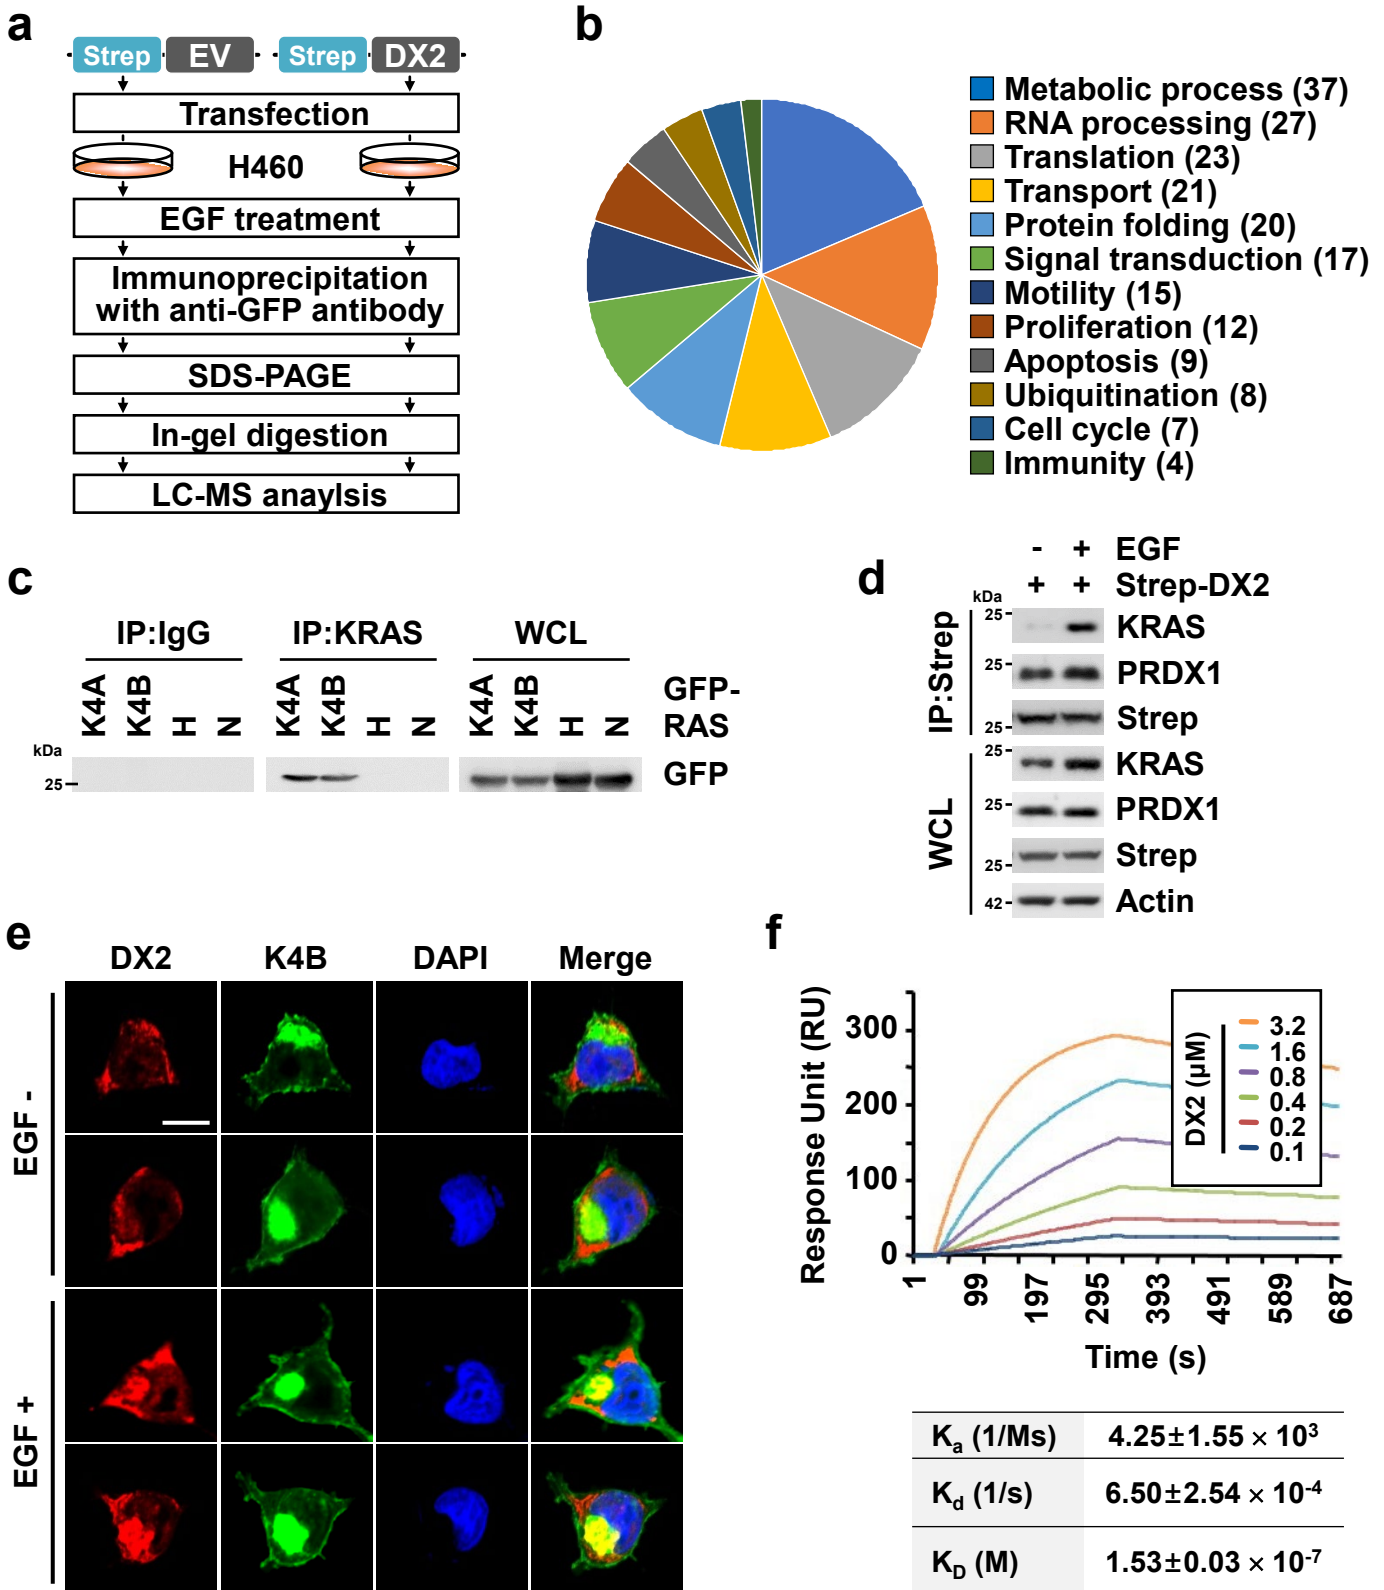

**Supplementary Fig. 3 Specific binding between DX2 and KRAS, but not NRAS and HRAS. a** Strategy of interactome analysis for identifying DX2-binding proteins upon EGF signaling. **b** Venn diagram showing the ontological classification from DX2-binding top 200 proteins identified by interactome analysis. Number of proteins in each ontology is shown in brackets. **c** Evaluation of specific KRAS antibody available for immunoprecipitation assay. The 293T cells expressing GFP-RAS isoforms were subjected to immunoprecipitation using the specific antibody against KRAS. Immunoprecipitated RAS proteins were determined by SDS-PAGE and immunoblotting using GFP antibody. IgG was used as a negative control for the used antibody. **d** H460 cells expressing Strep-DX2 were treated with EGF for 30 min and subjected to immunoprecipitation. KRAS and PRDX1 co-precipitated with DX2 were determined as above. **e** 293T cells expressing GFP-KRAS4B were treated with EGF, and co-localization (yellow) of endogenous DX2 (red) and KRAS4B (green) was monitored by confocal microscopy. DAPI was used for the staining of nucleus and two representative images are shown. Scale bar = 10  $\mu\text{m}$ . **f**  $K_D$  value for the binding affinity between DX2 and KRAS4B as determined by surface plasmon resonance analysis ( $n = 1$ ). Source data are provided as a Source data file. **c-d** Results are representative of at least three independent experiments.



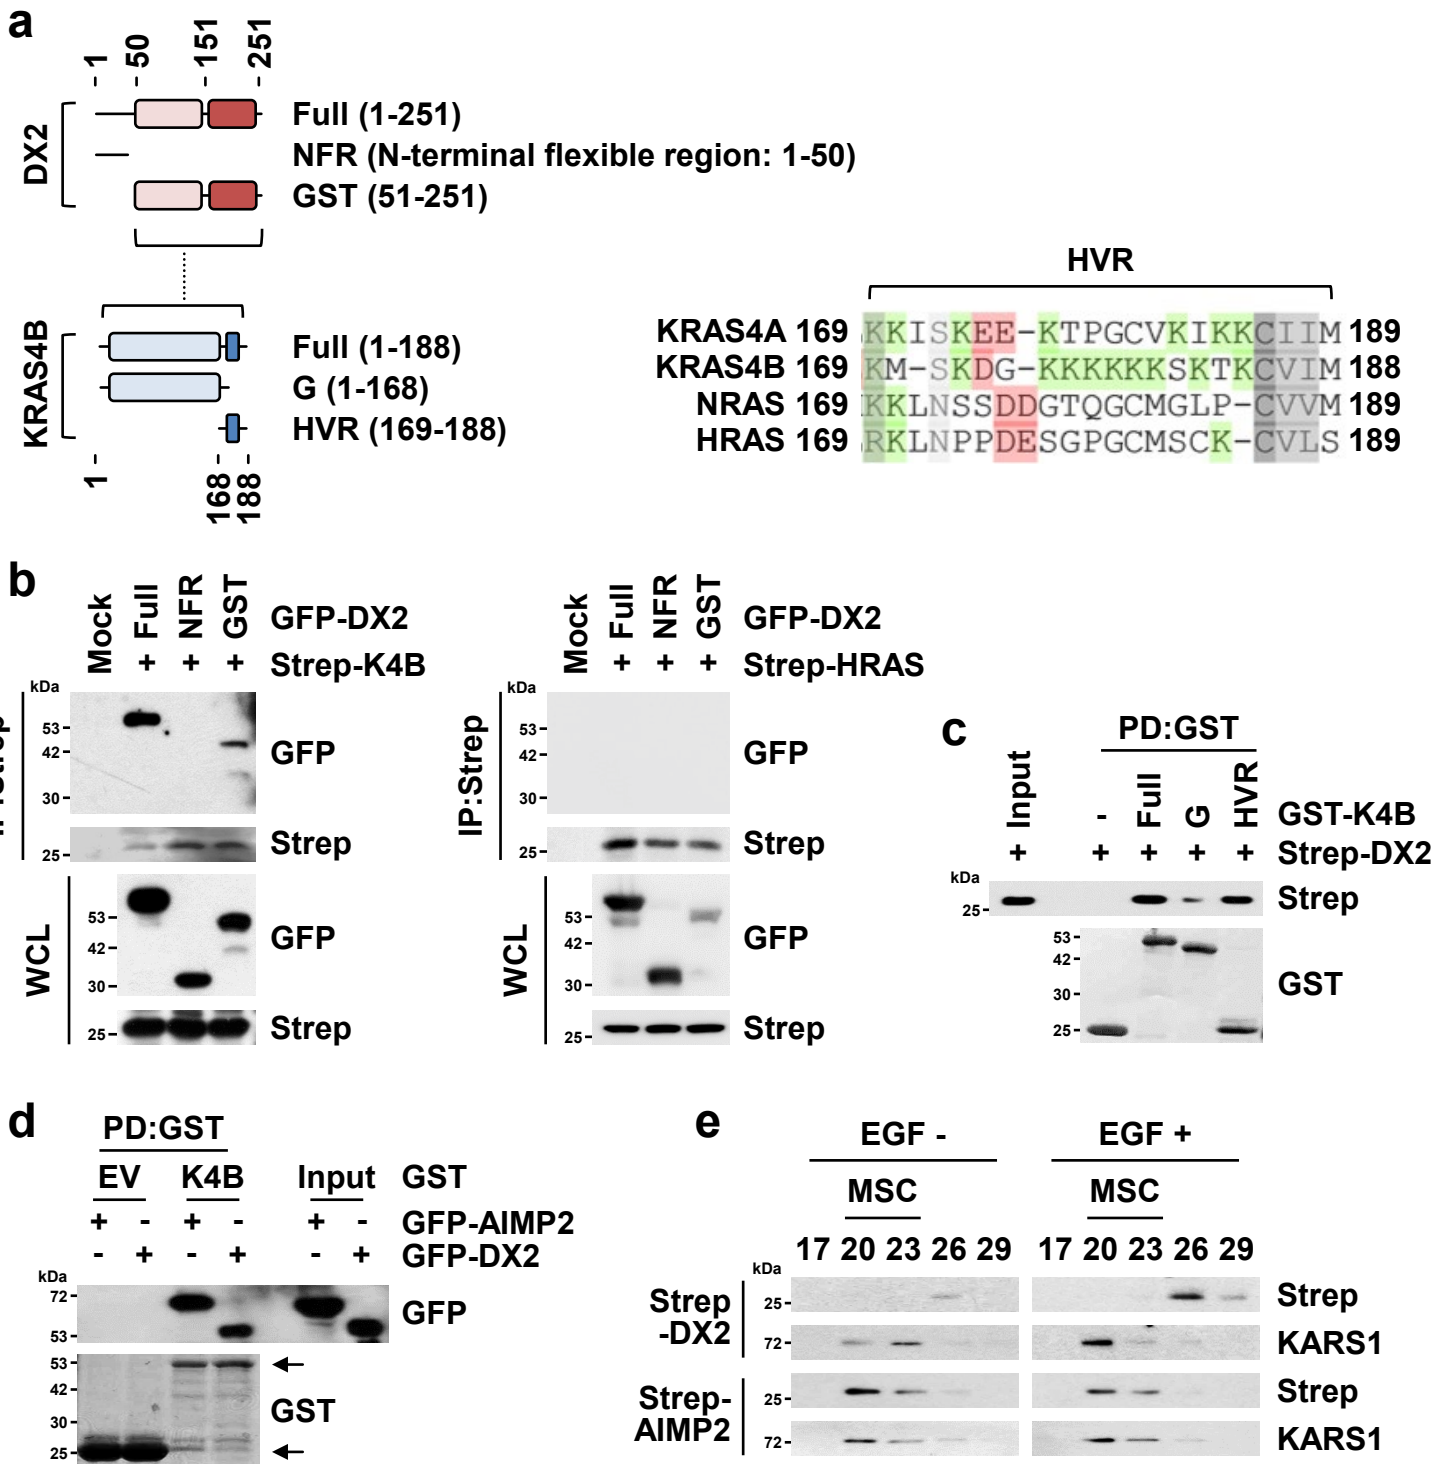

**Supplementary Fig. 4 Determination of the domain responsible for the binding of DX2 with KRAS.**

**a** Domains involved in the interaction (marked with brackets) are connected by a dashed line (left). Amino acid sequence alignment of the HVR from four RAS isoforms. Grey, green, and pink colors indicate the sequence similarity, positive and negative charges, respectively (right). **b** 293T cells expressing different GFP-tagged domains of DX2 and Strep-KRAS4B (left) or -HRAS (right) were precipitated using a strep-tactin column. The DX2 domain that co-precipitated with RAS isoforms was detected by immunoblotting with anti-GFP antibody. **c** Different GST-tagged domains of KRAS4B were mixed with cell extracts containing Strep-DX2 and precipitated with glutathione-Sepharose beads. The DX2 domain that co-precipitated with KRAS4B was determined by immunoblotting using anti-strep antibody. GST-KRAS4B domains were confirmed by Coomassie staining. PD means pull-down. **d** Purified GST-KRAS4B mixed with cell lysates containing each of GFP-AIMP2 and -DX2 was precipitated with glutathione-Sepharose beads. Binding of AIMP2 and DX2 to KRAS was determined as above. **e** CCD18CO cells expressing Strep-DX2 or -AIMP2 were treated with EGF for 4 h. Proteins in the cell extracts were separated by gel-filtration chromatography. DX2 and AIMP2 in the indicated fractions were detected by immunoblotting. KARS1 (lysyl-tRNA synthetase1) was monitored as a representative component of the multi-tRNA synthetase complex (MSC). Source data are provided as a Source data file. **b-e** Results are representative of at least three independent experiments.

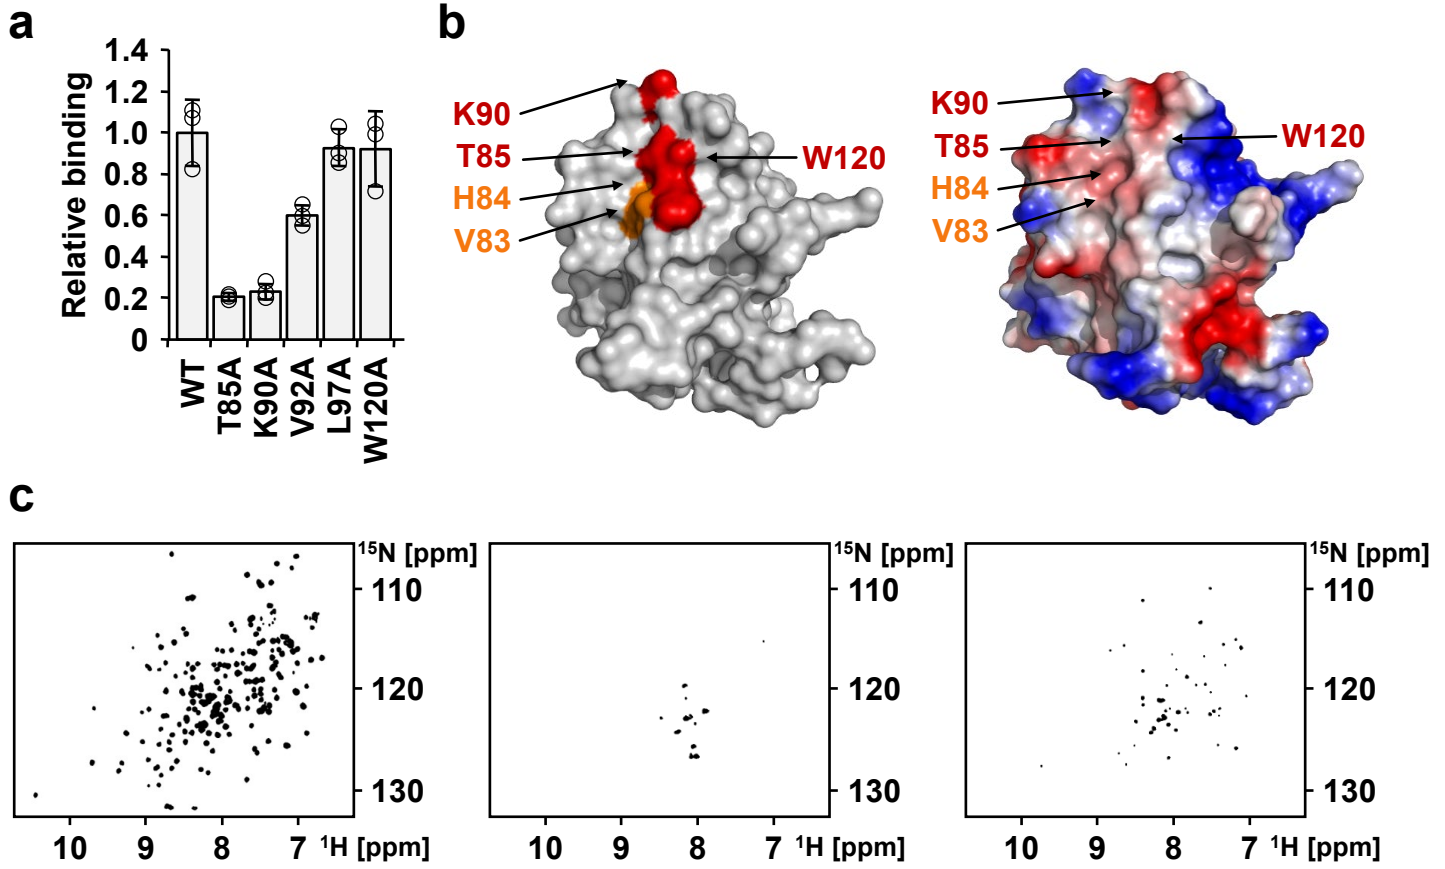

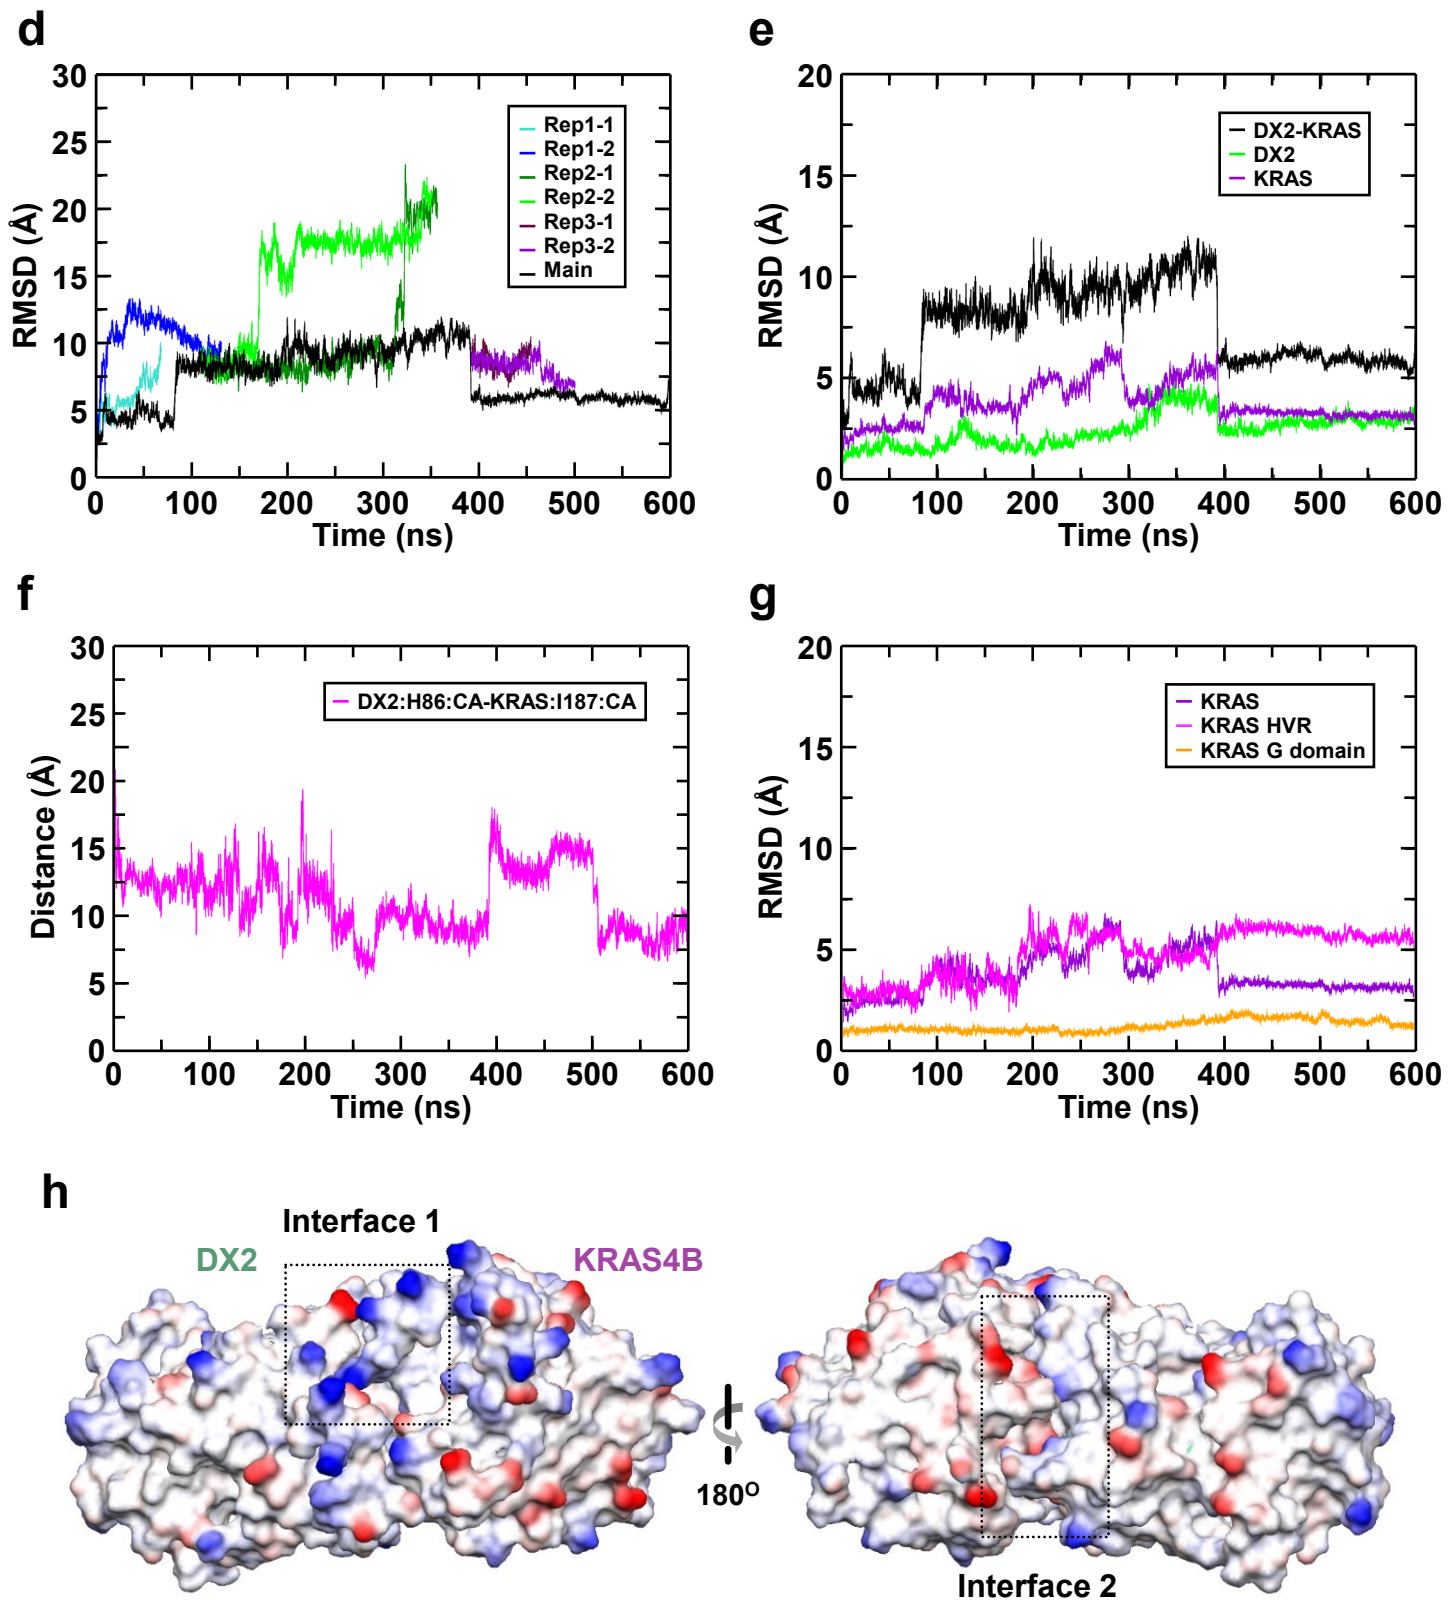

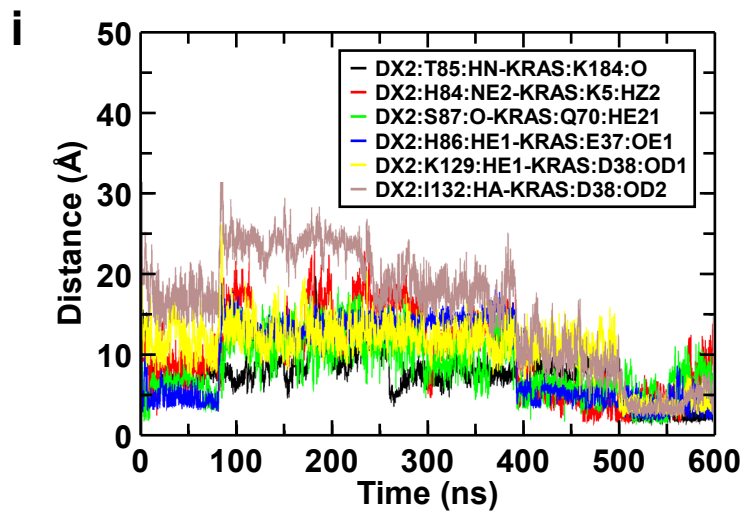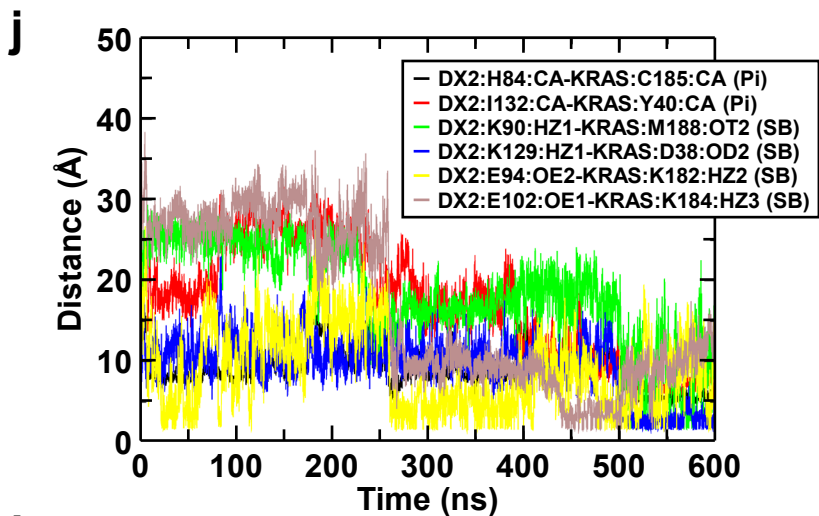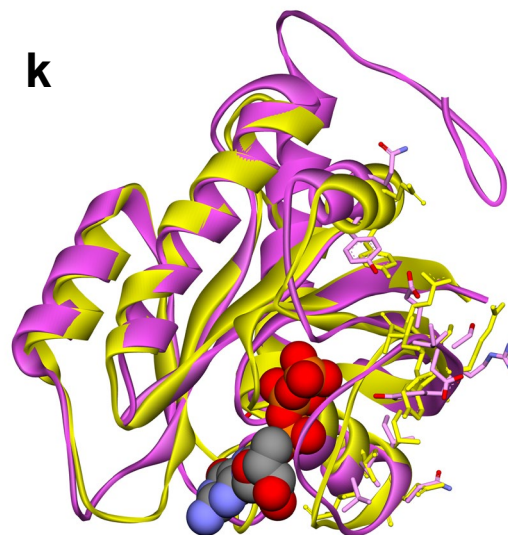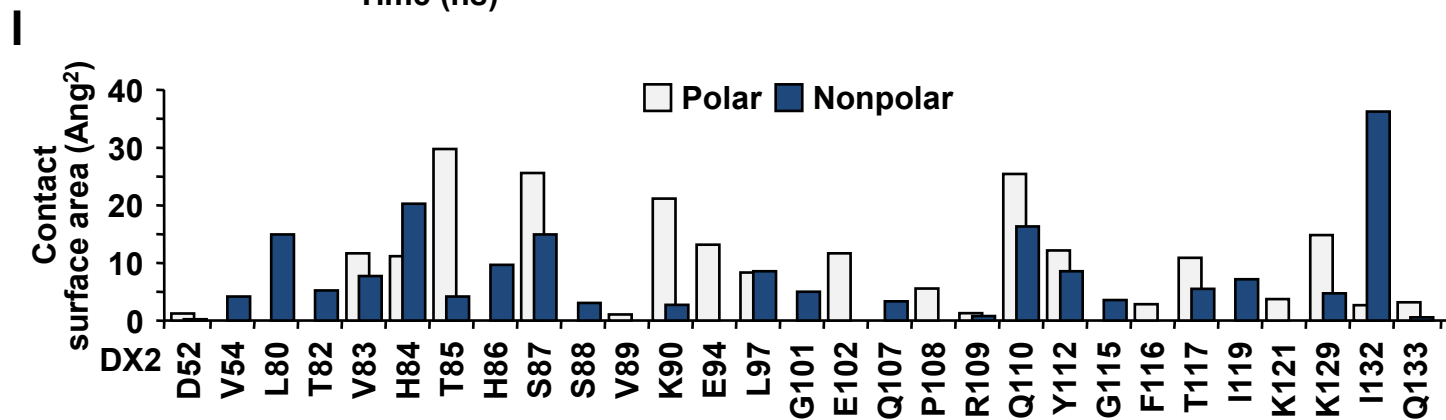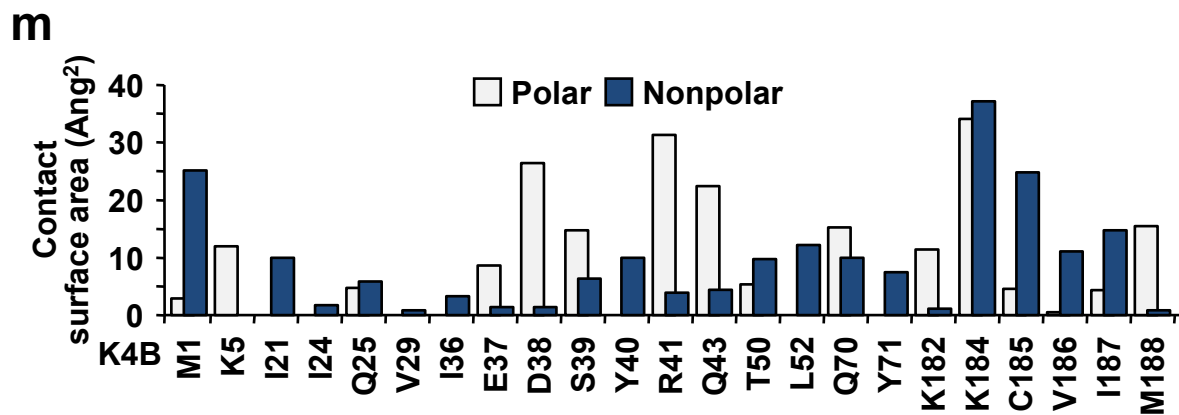

**D**

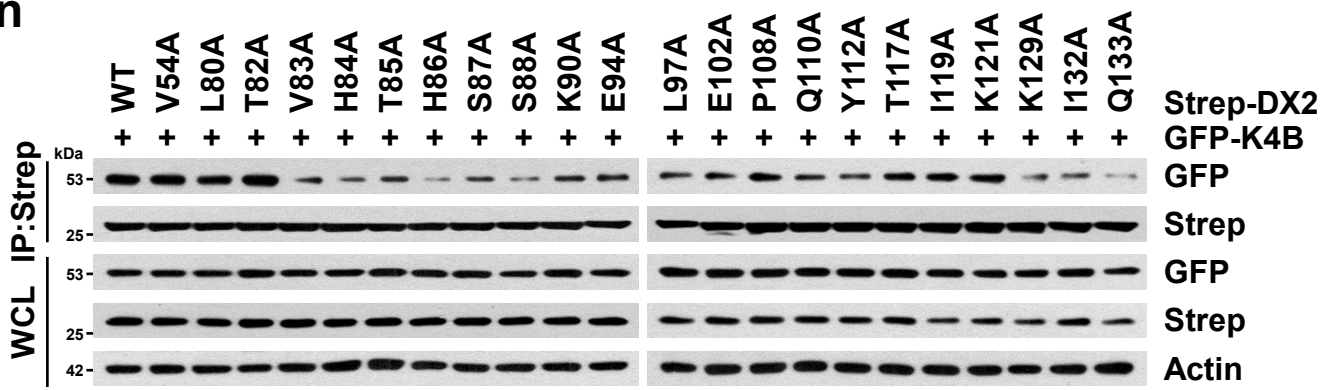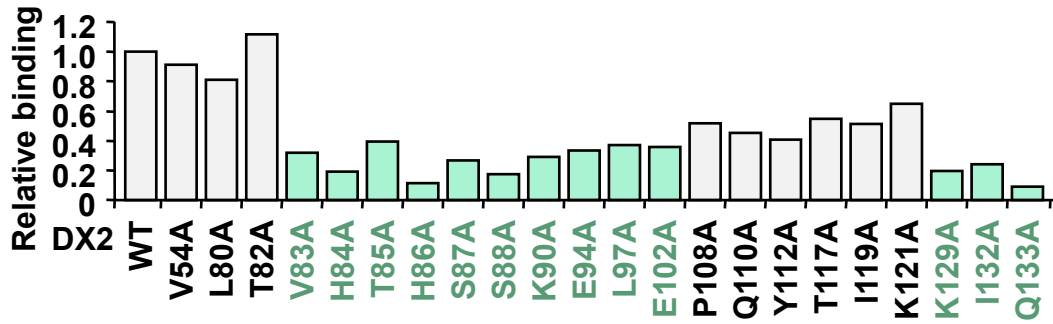

**O**

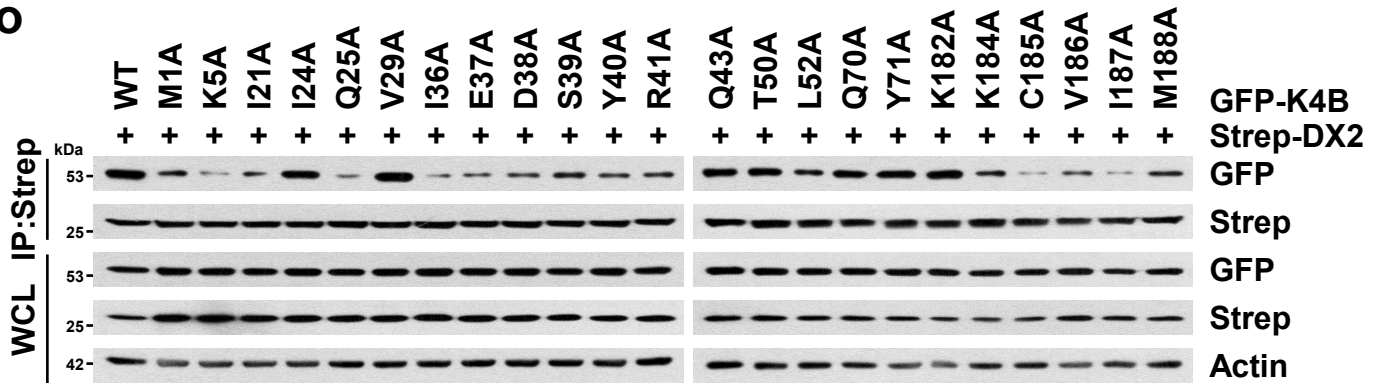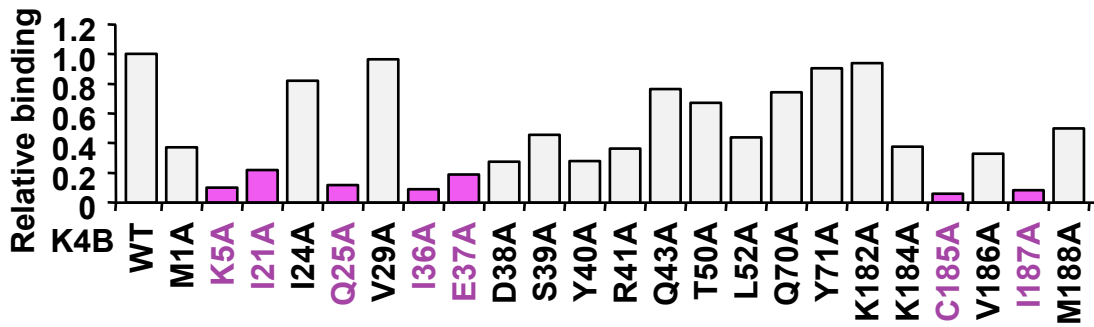

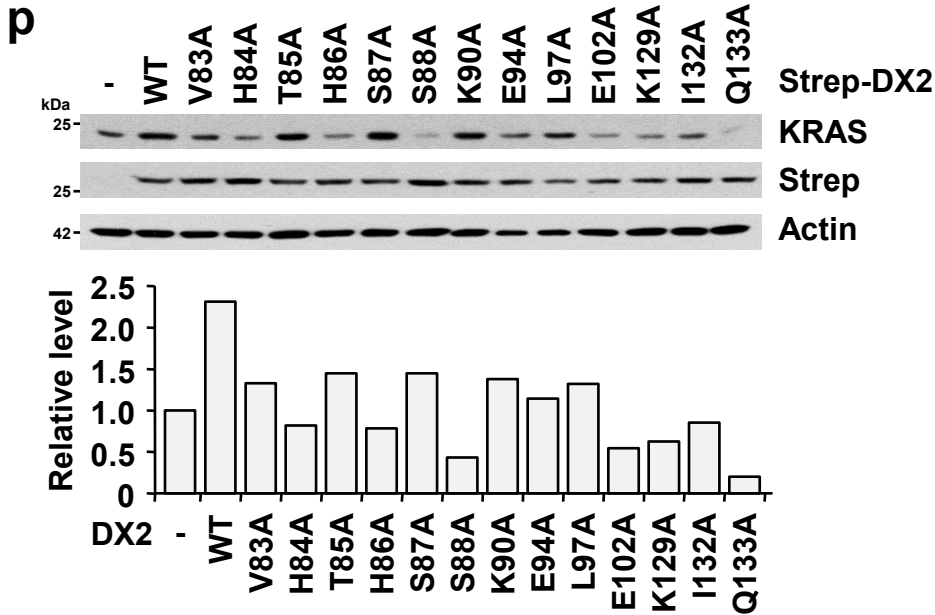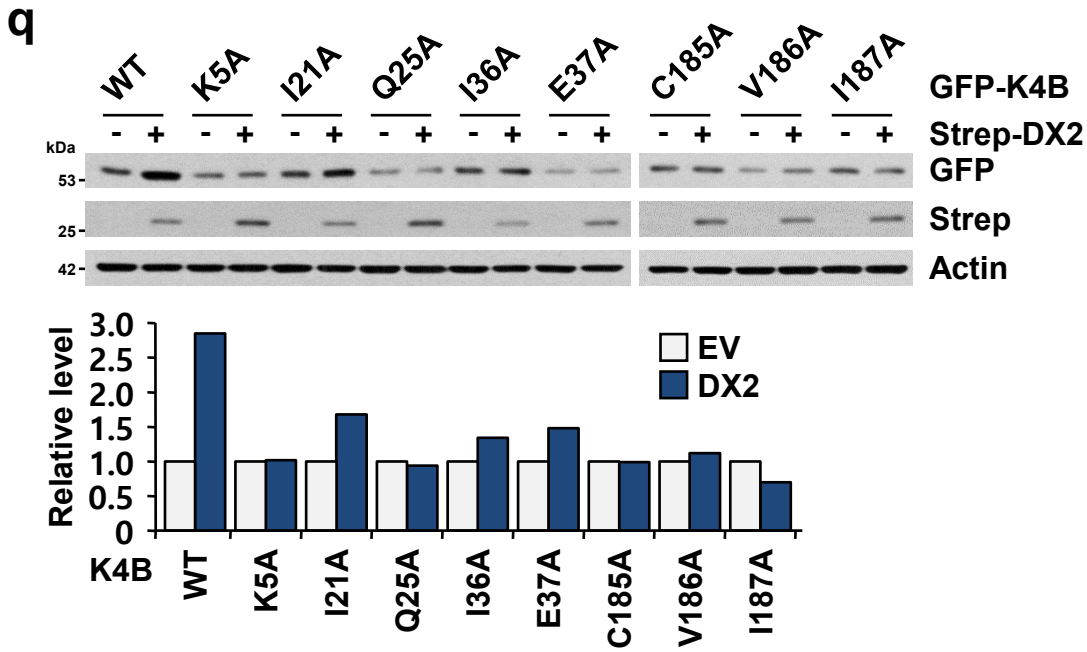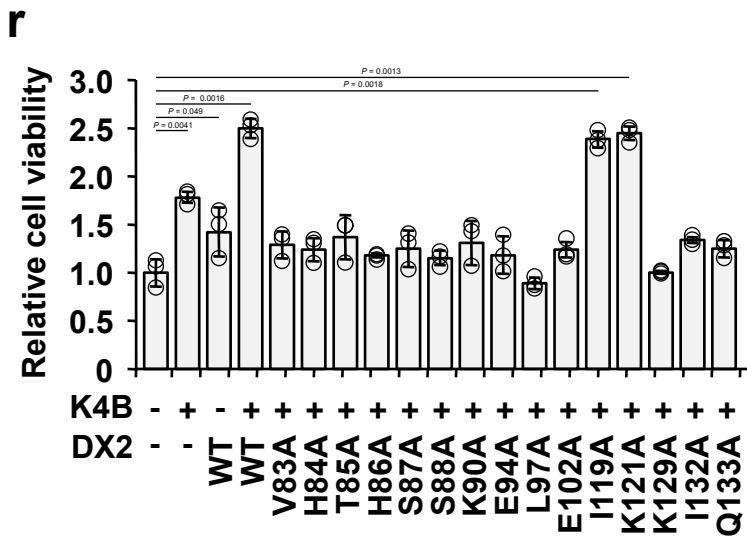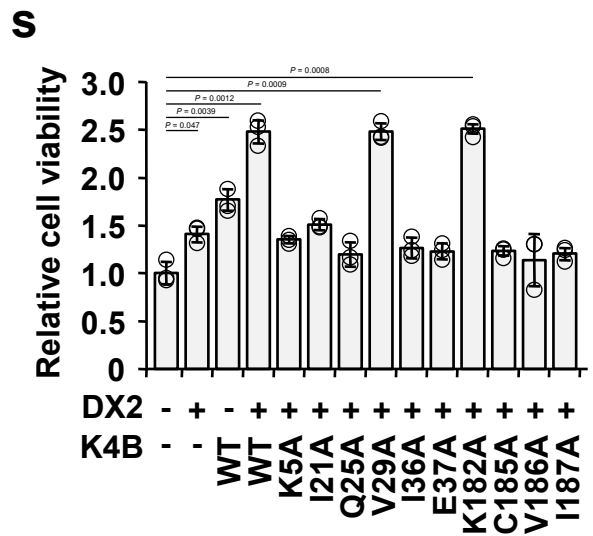

**Supplementary Fig. 5 Determination of the binding mode of DX2 with KRAS.** **a** Strep-DX2 mutants were introduced into 293T cells expressing nanoluciferase-KRAS4B and precipitated by the strep-tactin column. The amounts of co-precipitated KRAS4B were measured by the luciferase assay and presented as a bar graph. Experiments were independently repeated thrice and error bars denote the S.D. All error bars represent the standard deviation (S.D.). **b** Mapping results from chemical shift perturbation of  $^{15}\text{N}$ -labeled DX2<sub>51-251</sub>(C136S, C222S) by binding to KRAS4B HVR peptide (Fig. 3a). The residues showing strong ( $\Delta\delta > 0.02$  ppm) and medium ( $0.01 < \text{CSP} \leq 0.02$  ppm) perturbation are shown in red and orange, respectively, on the surface of DX2 (left). The weighted average of chemical shift changes,  $\Delta\delta$ , was calculated by the equation  $\Delta\delta$  (ppm) =  $(\delta\text{H}^2 + 0.2 \times \delta\text{N}^2)^{1/2}$ . The surface electrostatic potential of DX2 was presented in the same orientation (right). **c**  $^1\text{H}$ - $^{15}\text{N}$  TROSY spectra of  $^{15}\text{N}$ -labeled DX2<sub>51-251</sub>(C136S, C222S) (left) in the presence of HRAS (middle) or RALA HVR peptide (right). **d** Root mean square deviation (RMSD) of C $\alpha$  atoms of the DX2-KRAS4B complex from nine MD simulation trajectories. Among the three trials at three time points, one selected main trajectory was extended to 600 ns (black). **e** C $\alpha$ -RMSD of DX2 (green), KRAS4B (violet), and DX2-KRAS4B complex (black) structure over simulation time for the main trajectory. **f** Distance of C $\alpha$  atoms between DX2 H86 and KRAS4B I187. **g** C $\alpha$ -RMSD of KRAS4B (violet), HVR (magenta), and G domain (orange). For the C $\alpha$ -RMSD calculations, the initial frame was used as reference structure and the RMSD fitted by itself. **h** Result of the MD simulation to determine the binding surface of DX2 and KRAS4B. The proteins were presented as a surface model and two significant interfaces are highlighted by the dashed box (Fig. 3c). **i, j** Distance of hydrogen bond (**i**) and Pi interactions and salt bridges (**j**) of the indicated key residue pairs calculated from the main trajectory of the DX2-KRAS4B system. **k** Final snapshot of KRAS4B (magenta) superimposed with its GTP-bound conformation (yellow). The binding residues are presented by a stick. **l, m** Contact surface area of the binding residues in DX2 (**l**) and KRAS4B (**m**) from the representative snapshot at 533.7 ns. **n, o** Validation of the residues implicated as critical for the binding between DX2 and KRAS4B. The 293T cells expressing Strep-DX2 (**n**) or -KRAS4B (**o**) mutants were subjected to immunoprecipitation using the anti-strep antibody. Precipitates were separated by SDS-PAGE and the binding of two proteins was determined by immunoblotting using their specific antibodies. The results were quantified and important residues of DX2 and KRAS4B were highlighted in light green and magenta colors, respectively, in the graph below each experiment. **p-s** Characterization of DX2-mediated cellular level and activity of KRAS using the binding-defective mutants of two proteins. DX2-dependent increase in the KRAS levels in cells expressing the indicated mutants of the two proteins was detected by immunoblotting using specific antibodies. The results were quantified and presented as a bar graph below each experiment (**p, q**). Same cells as above were subjected to MTT assay for checking KRAS4B-mediated control of cell viability. (**r, s**). **r, s** All the experiments were independently repeated thrice and error bars denote the S.D. Data are presented as mean values  $\pm$  S.D. *P*-value is from the two-sided t-test. Source data are provided as a Source data file. **n-q** Results are representative of at least three independent experiments.



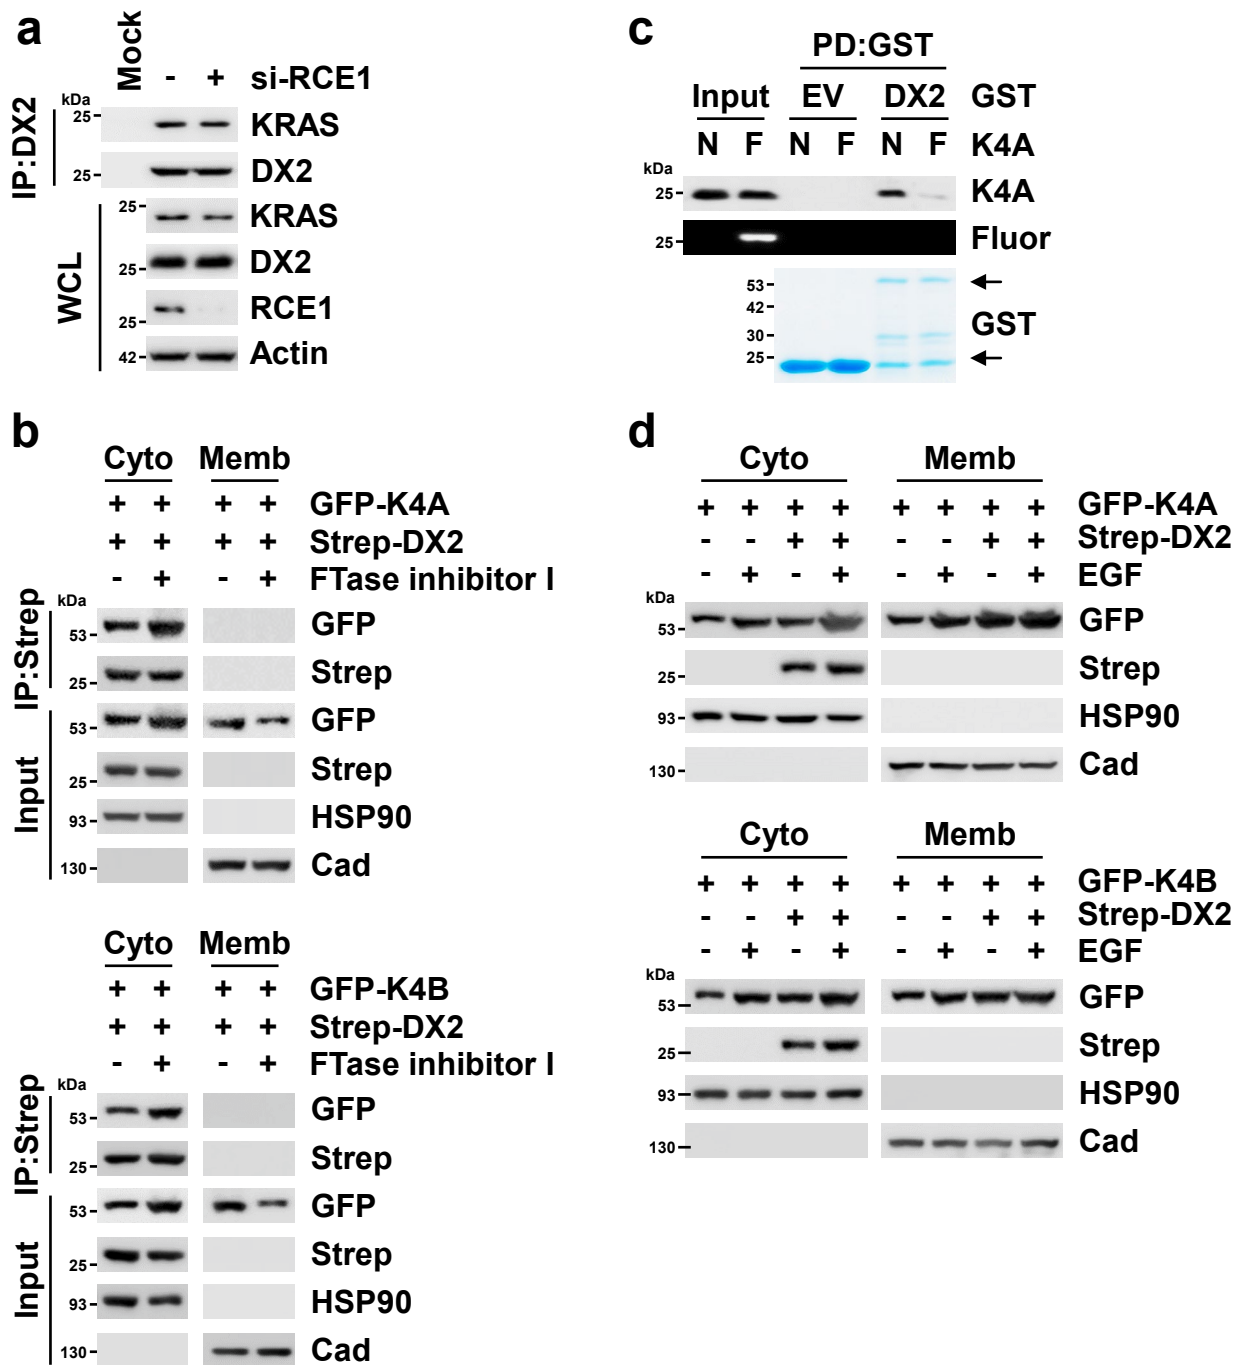

**Supplementary Fig. 6 Determination of the KRAS status for DX2 binding.** **a** Validation of RCE-1 implicated for the binding of KRAS and DX2. H460 cells expressing si-RCE1 were immunoprecipitated by using the anti-DX2 antibody. Precipitates were separated and detected by SDS-PAGE and immunoblotting, respectively. **b** The 293T cells expressing KRAS4A (upper) or KRAS4B (bottom) with DX2 were treated with FTase inhibitor I and separated to cytosol (Cyto) and membrane (Memb) fractions. HSP90 and cadherin (Cad) were used as loading markers for the cytosol and membrane, respectively. **c** *In vitro* pull-down assay to determine the DX2 binding to farnesylated KRAS4A. *In vitro* farnesylated KRAS4A was incubated with purified GST-DX2. Binding of the two proteins and KRAS farnesylation were determined by immunoblotting and fluorescent scanning, respectively. N and F mean native and farnesylated KRAS4A, respectively. **d** The 293T cells expressing GFP-KRAS4A (upper) or 4B (bottom) with Strep-DX2 were treated with EGF and separated into cytosol and membrane fractions. Source data are provided as a Source data file. **a-d** Results are representative of at least three independent experiments.

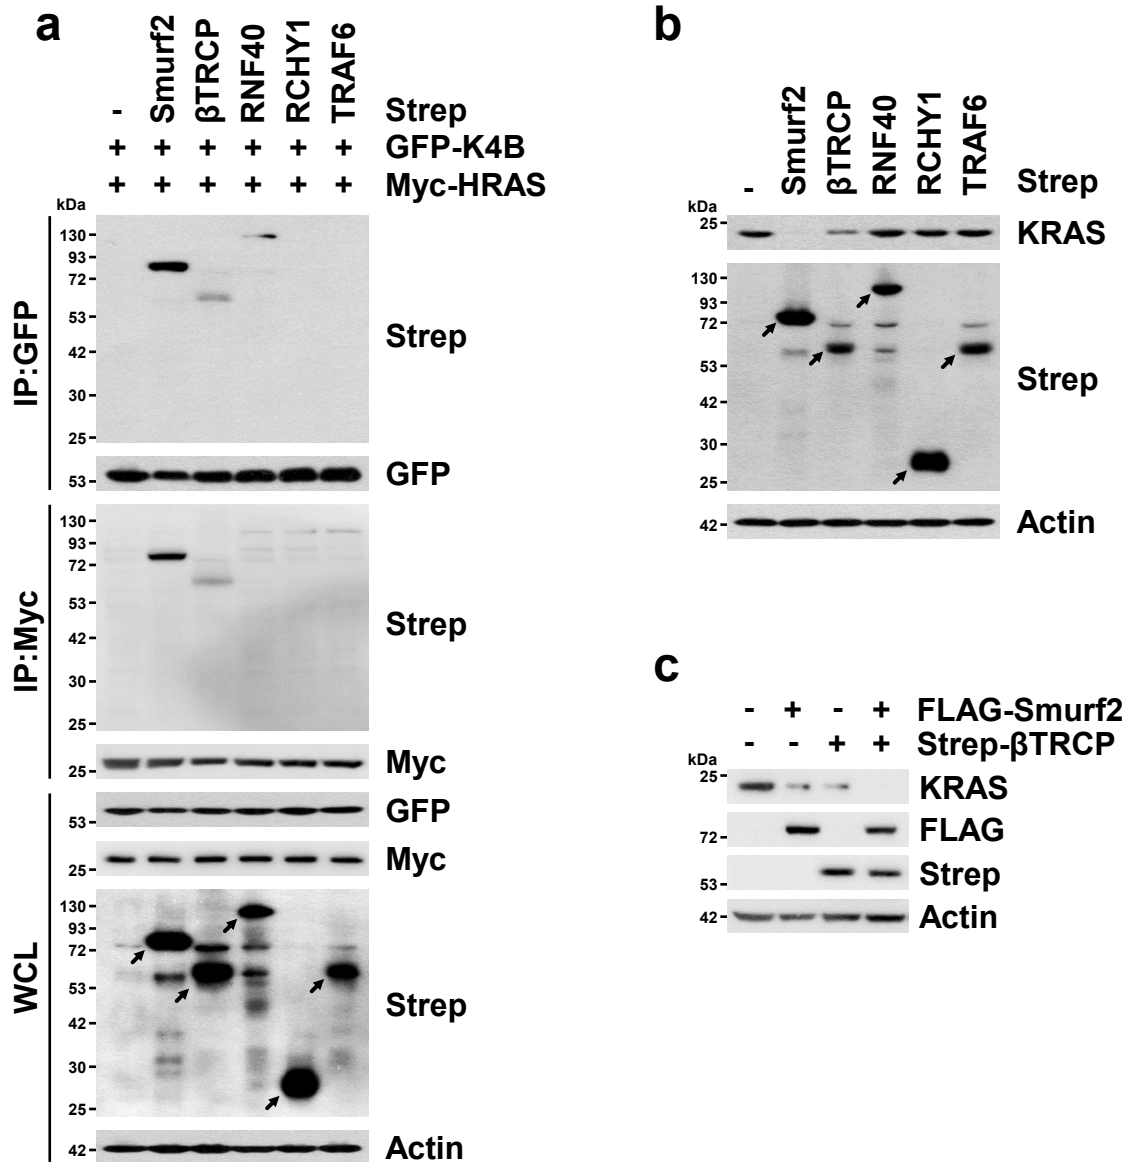

**Supplementary Fig. 7 Identification of specific E3 ligase, Smurf2, against KRAS.** **a, b** Determination of the E3 ligase responsible for ubiquitination of KRAS4B. The 293T cells expressing GFP-KRAS4B and Myc-HRAS were introduced into Strep-Smurf2,  $\beta$ TRCP, RNF40, RCHY1, and TRAF6, and treated with MG-132 for 12 h. KRAS4B or HRAS was immunoprecipitated with the anti-GFP or -Myc antibody and co-precipitated proteins were detected by SDS-PAGE and immunoblotting using the anti-strep antibody (**a**). Cellular levels of endogenous KRAS were monitored in 293T cells expressing the above E3 ligases (**b**). **c** H460 cells expressing FLAG-Smurf2 and Strep- $\beta$ TRCP were treated with EGF and subjected to SDS-PAGE and immunoblotting. Source data are provided as a Source data file. **a-c** Results are representative of at least three independent experiments.

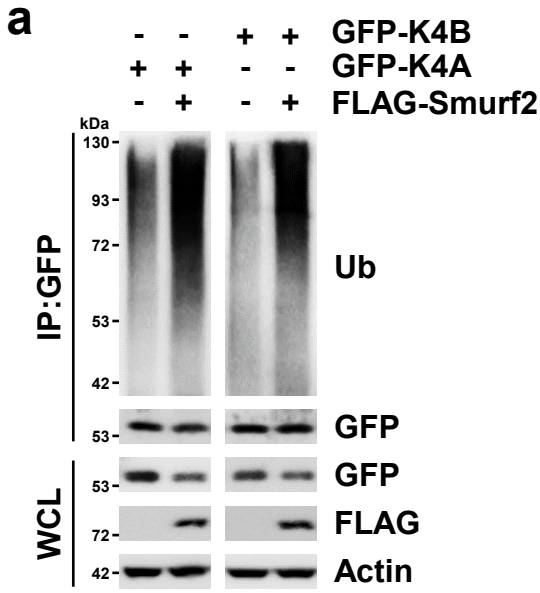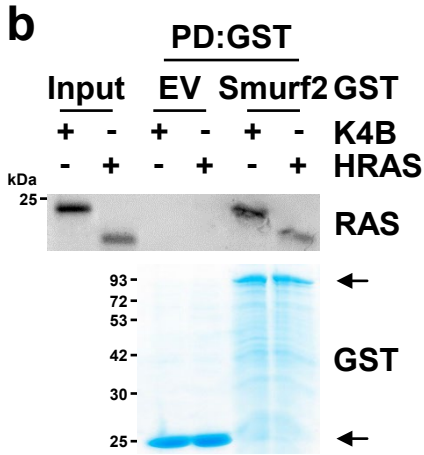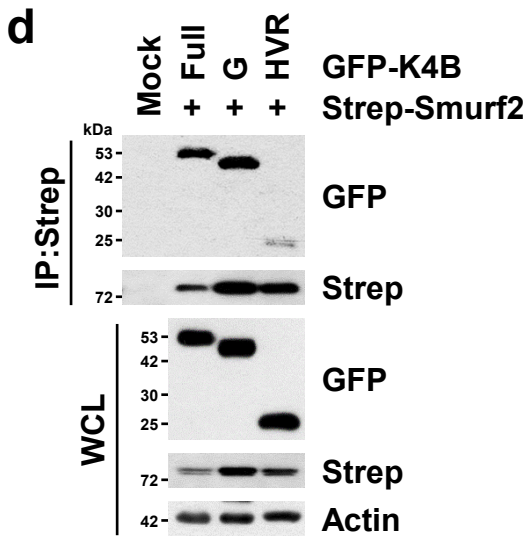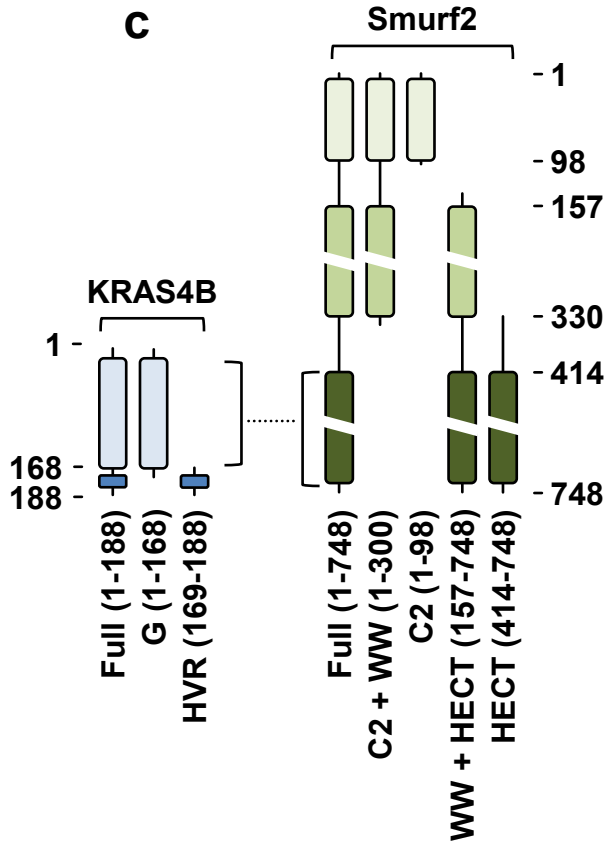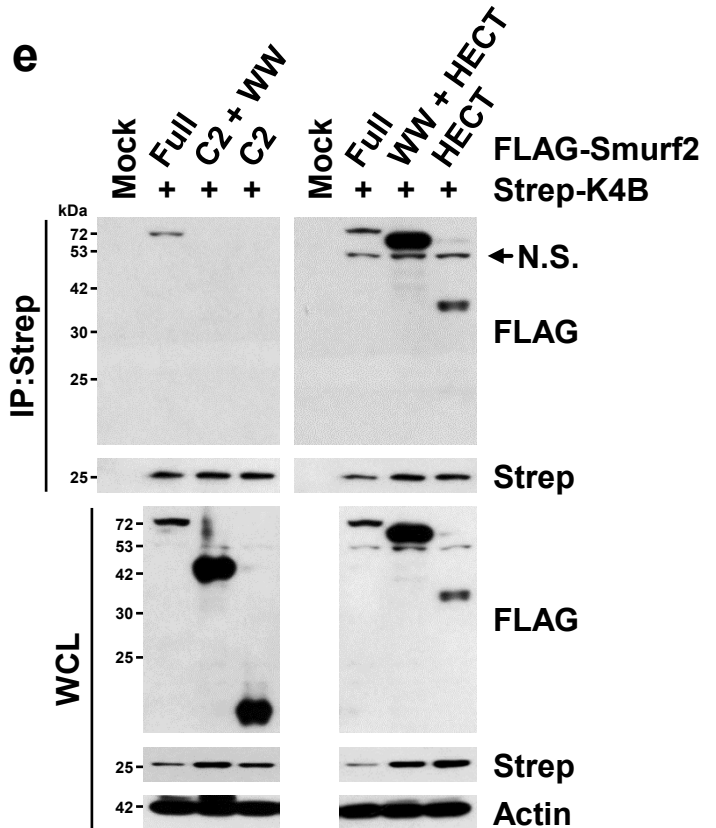

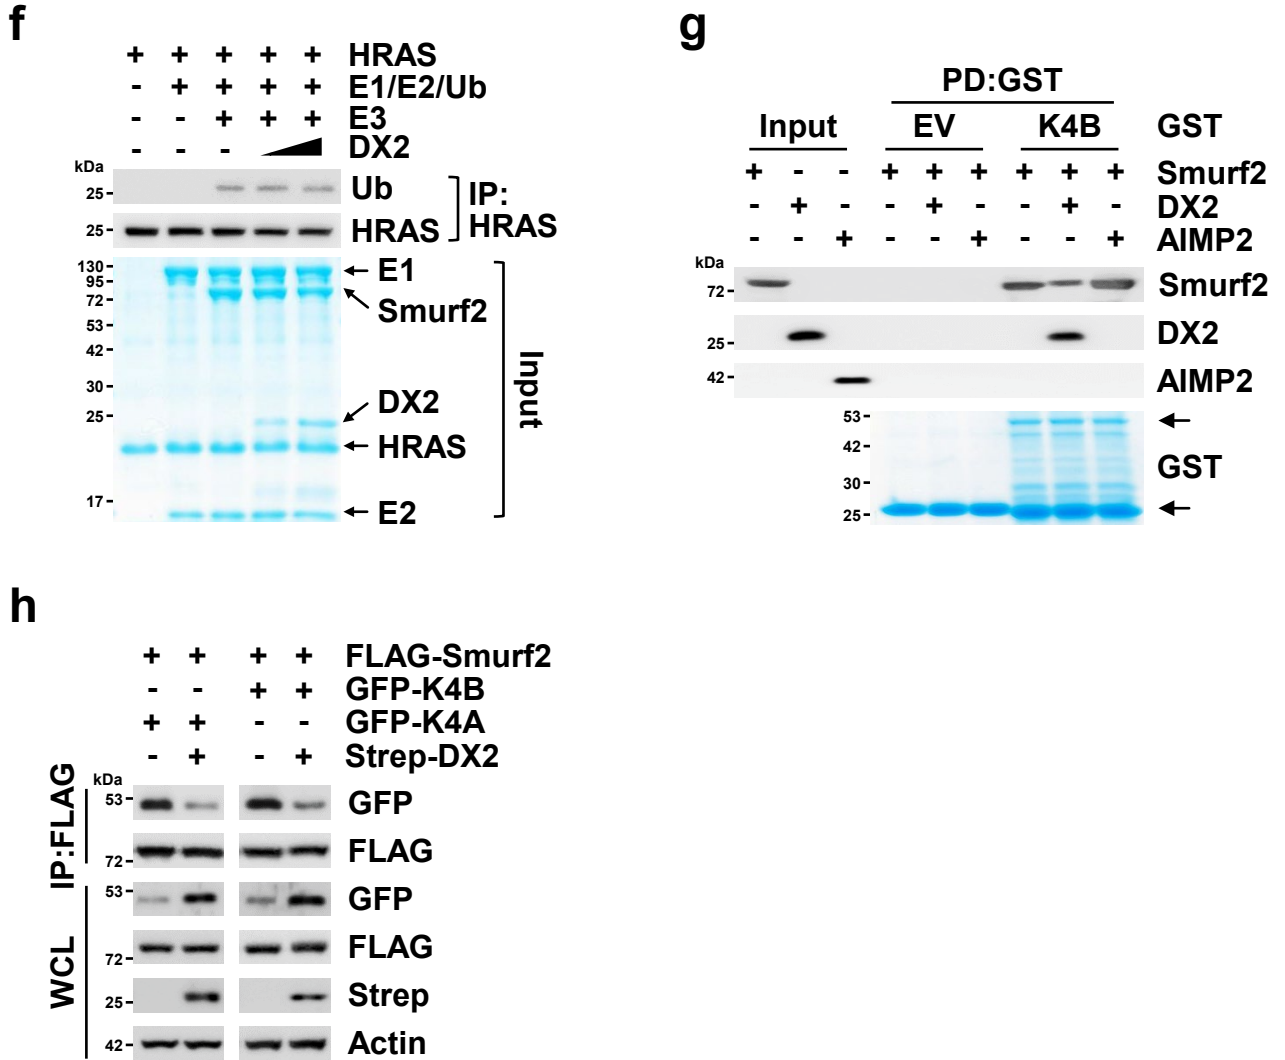

**Supplementary Fig. 8 Smurf2-mediated ubiquitination of KRAS.** **a** The 293T cells expressing GFP-KRAS4A, 4B, and FLAG-Smurf2 in the indicated combinations were treated with MG-132 for 24 h and subjected to immunoprecipitation with the anti-GFP antibody. Amounts of the ubiquitinated RAS were determined by immunoblotting using the anti-ub antibody. **b** *In vitro* pull-down assay for the binding of Smurf2 to KRAS4B or HRAS. Purified KRAS4B or HRAS were mixed with GST-Smurf2 proteins and co-precipitates with GST-tagged proteins were determined by immunoblotting with the pan-RAS antibody and Coomassie staining, respectively. **c-e** Determination of domains responsible for Smurf2-KRAS4B binding. Domain arrangements of Smurf2 and KRAS4B. The domains involved in the binding of the two proteins are marked with brackets connected by dashed line (**c**). The 293T cells expressing Strep-Smurf2 were introduced with each domain of GFP-KRAS4B and immunoprecipitated with the anti-Strep antibody. Co-precipitates were analyzed by immunoblotting using their specific antibodies (**d**). The 293T cells co-expressing each domain of FLAG-Smurf2 and Strep-KRAS4B were subjected to immunoprecipitation. Co-precipitated Smurf2 domain with KRAS4B was monitored as above. N.S. denotes non-specific blotted signal (**e**). **f** *In vitro* ubiquitination assay analyzing the effect of DX2 on Smurf2-mediated ubiquitination of HRAS. UBE1, UbcH5c/UBE2D3, Smurf2, and HRAS were used as E1, E2, E3, and substrate for the reaction, respectively. The ubiquitinated amounts of HRAS were detected by immunoblotting (upper) and proteins used in the reaction were confirmed by Coomassie staining in input panel (bottom). **g** *In vitro* pull-down assay determining the inhibitory effect of DX2 or AIMP2 on the interaction between KRAS4B and Smurf2. Smurf2 and GST-KRAS4B proteins were mixed and then DX2 or AIMP2 added. Precipitated proteins with GST-KRAS4B were detected by immunoblotting and Coomassie staining. **h** The 293T cells expressing FLAG-Smurf2, Strep-DX2, and GFP-KRAS4A and 4B in the indicated combinations were subjected to immunoprecipitation using the anti-FLAG antibody. The proteins co-precipitated with Smurf2 were determined by immunoblotting with the specific antibodies. Source data are provided as a Source data file. **a-b, d-h** Results are representative of at least three independent experiments.

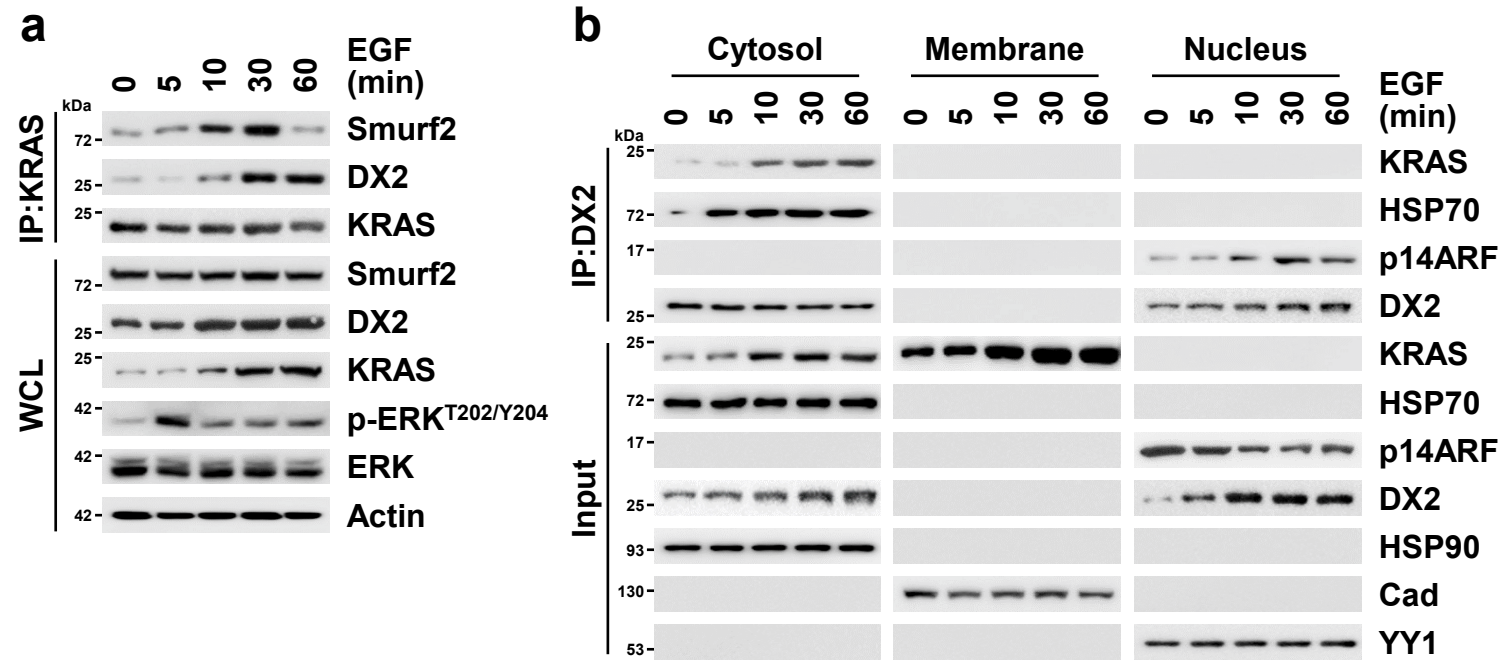

**Supplementary Fig. 9 Analysis of EGF-dependent binding kinetics of KRAS and DX2.** **a, b** H460 cells treated with EGF in a time-dependent manner were subjected to immunoprecipitation using the anti-KRAS antibody (**a**). Same cells were separated into the cytosol, membrane, and nucleus fractions, and DX2 in each fraction was immunoprecipitated by its specific antibody (**b**). All the binding results were quantified and presented as a graph (Fig. 4g). Source data are provided as a Source data file. **a-b** Results are representative of at least three independent experiments.

a

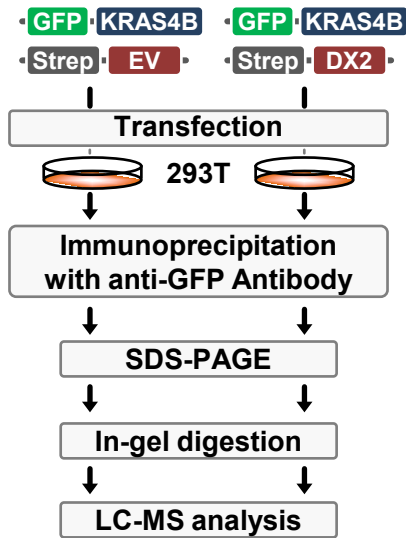

DX2 -

| Peptide                               | Residue          |
|---------------------------------------|------------------|
| 102RVkDSEDVPMVLVGNk <sup>117</sup>    | K104, K117       |
| 89SFEDIHHYREQIkR <sup>102</sup>       | K101             |
| 105DSEDVPMVLVGNkCDLPSR <sup>123</sup> | K117             |
| 179kkSk <sup>182</sup>                | K179, K180, K182 |
| 74TGEGFLCVFAINNTk <sup>88</sup>       | K88              |
| 102RVkDSEDVPMVLVGNk <sup>117</sup>    | K104             |
| 104VkDSEDVPMVLVGNk <sup>118</sup>     | K105             |

DX2 +

| Peptide                            | Residue    |
|------------------------------------|------------|
| 89SFEDIHHYREQIkR <sup>102</sup>    | K101       |
| 103VkDSEDVPMVLVGNk <sup>117</sup>  | K104       |
| 74TGEGFLCVFAINNTk <sup>88</sup>    | K88        |
| 102RVkDSEDVPMVLVGNk <sup>117</sup> | K104, K117 |

b

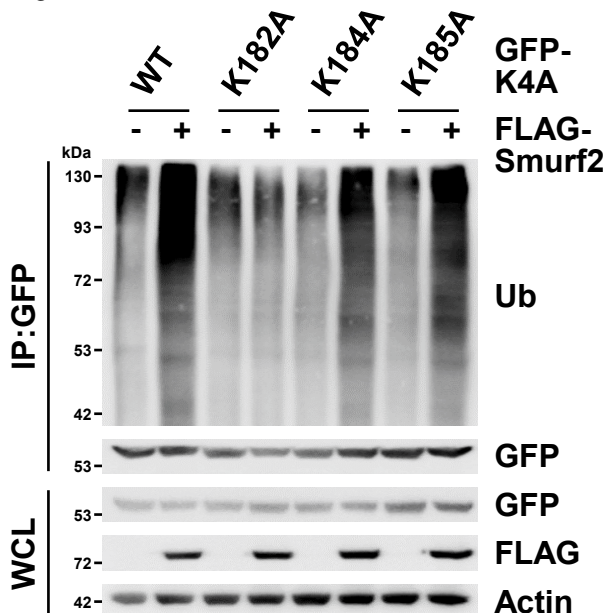

**Supplementary Fig. 10 Identification of the ubiquitination sites of KRAS.** **a** Strategy of mass spectrometry for identification of KRAS4B ubiquitination site to be affected by DX2. GFP-KRAS4B and Strep-DX2 were ectopically introduced into 293T cells and the cell extracts were subjected to immunoprecipitation with the antibody against GFP. Precipitates were subjected to SDS-PAGE and in-gel digestion for LC-MS analysis (left). Summarized table of the identified peptides containing ubiquitination sites in the sample without or with DX2 (right). Ubiquitinated lysine residues are denoted by red. **b** Identification of the Smurf2-mediated KRAS4A ubiquitination site using alanine substitution mutants. The 293T cells expressing GFP-KRAS4A mutants and FLAG-Smurf2 were treated with MG-132 and precipitated by the anti-GFP antibody. The ubiquitinated amounts of KRAS4A were monitored by immunoblotting using the anti-ub antibody. Source data are provided as a Source data file. Results are representative of at least three independent experiments.

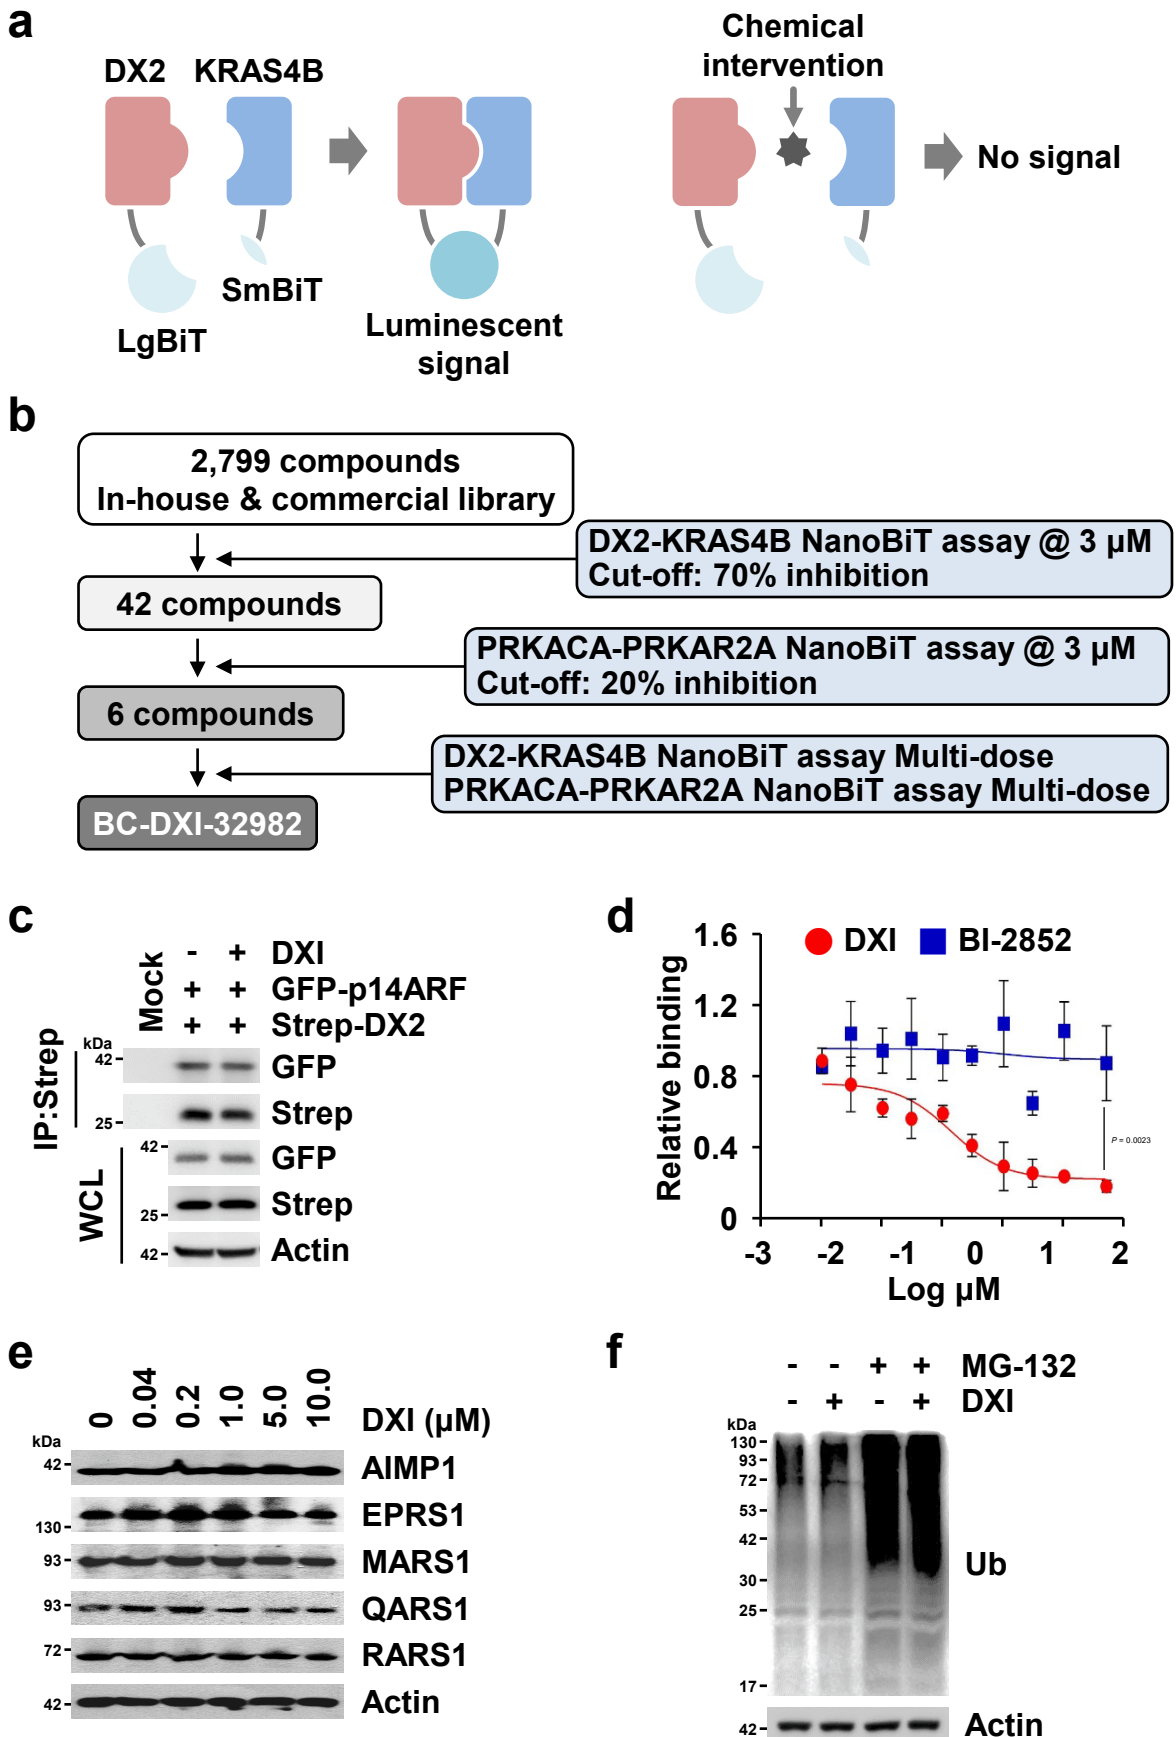



**Supplementary Fig. 11 Screening of the DX2-KRAS interaction inhibitor.** **a** Schematic representation of the screening assay using a NanoBiT system for identifying the chemicals that inhibit the interaction between DX2 and KRAS4B. The luminescent signal in the CHO-K1 cells expressing LgBiT-DX2 and SmBiT-KRAS4B proteins is abolished by chemical inhibition of the DX2-KRAS4B interaction. **b** Flow chart of the screening strategy. The chemicals (2,799) collected from the in-house and commercial chemical library were primarily screened at 3  $\mu$ M *via* assay as described above and 42 chemicals with over 70% inhibition were subjected to counter screening. PRKACA and PRKAR2A were used as the negative controls to check the target specificity and 6 chemicals were identified as hit compounds. Among the 6 chemicals, BC-DXI-32982 was selected for further study as it showed the strongest potency in the dose-dependency test. **c, d** Checking the target specificity of DXI in the binding between DX2 and KRAS. The 293T cells expressing GFP-p14ARF and Strep-DX2 were treated with DXI and subjected to immunoprecipitation using the anti-strep antibody (**c**). DXI or BI-2852, the reported KRAS catalytic inhibitor, was treated to CHO-K1 cells expressing LgBiT-DX2 and SmBiT-KRAS4B. The experiment was independently repeated three times and error bars denote the S.D. Data are presented as mean values  $\pm$  S.D. (**d**). **e** H460 cells treated with DXI in dose-dependent manner for 18 h were subjected to SDS-PAGE and immunoblotting (Fig. 5e). **f** H460 cells were treated with DXI and MG-132 and ubiquitination (Ub) of the whole proteins in the cell extracts was determined by immunoblotting with the anti-ub antibody. Source data are provided as a Source data file. **c, e-f** Results are representative of at least three independent experiments.

a

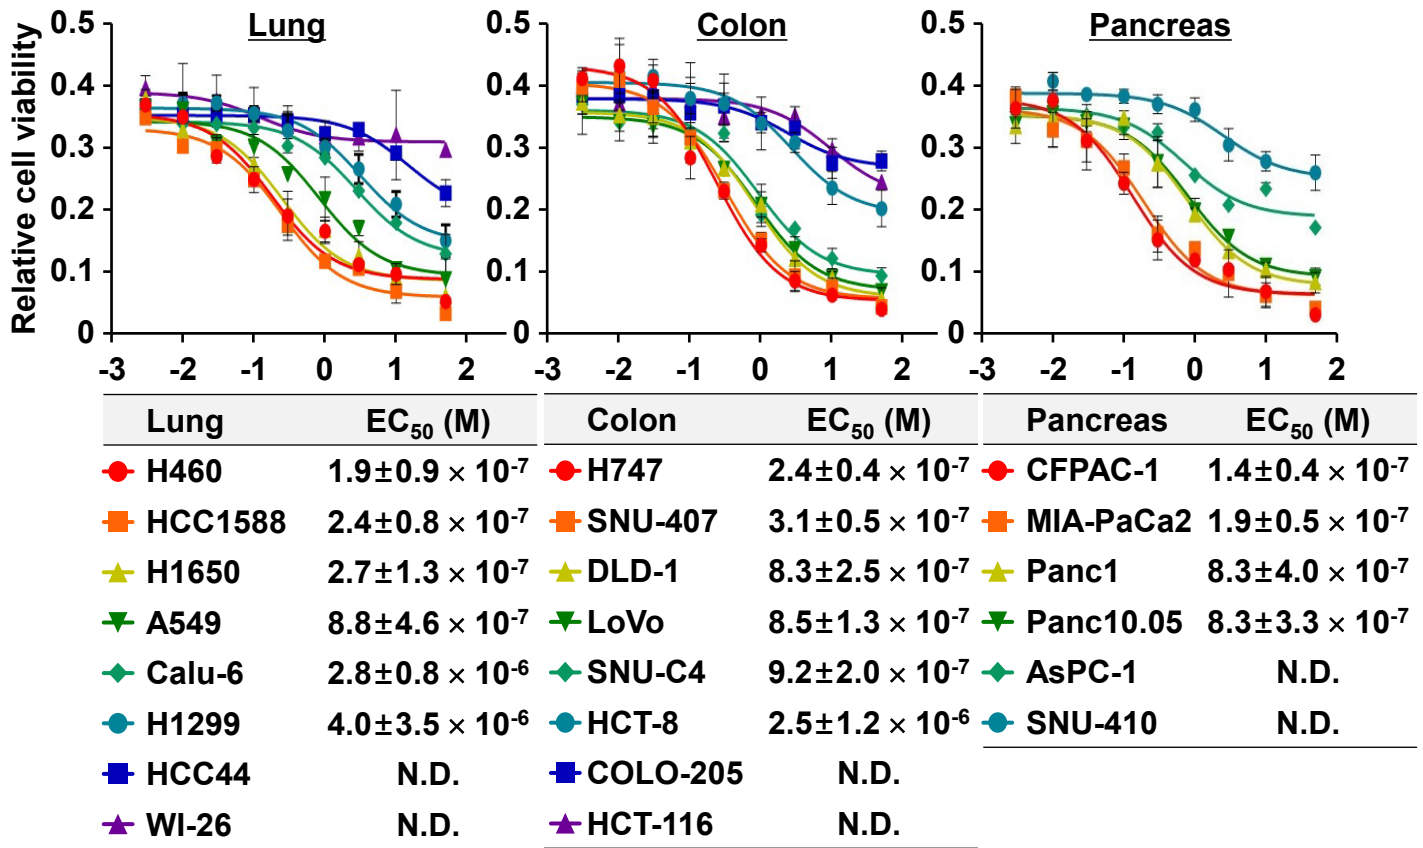

b

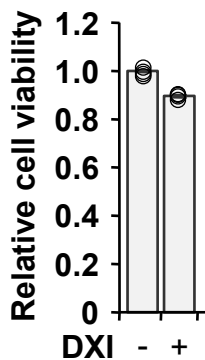

c

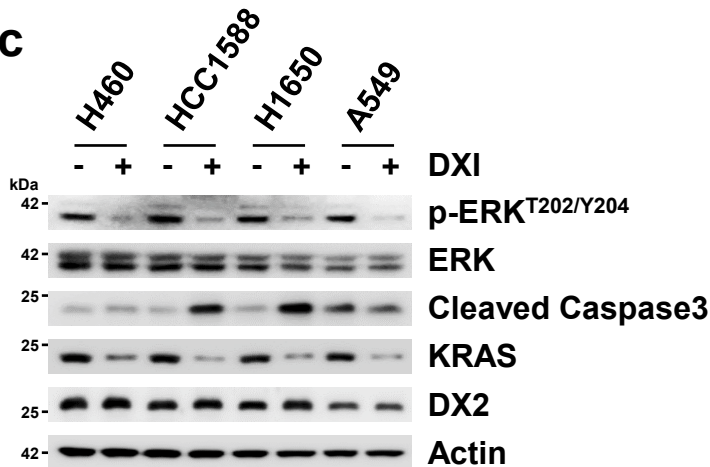

d

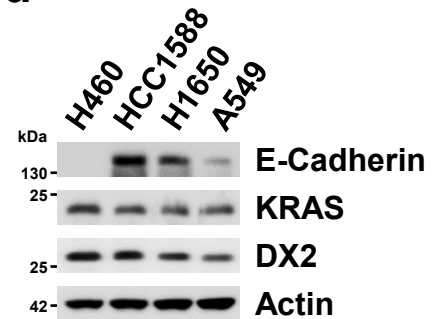

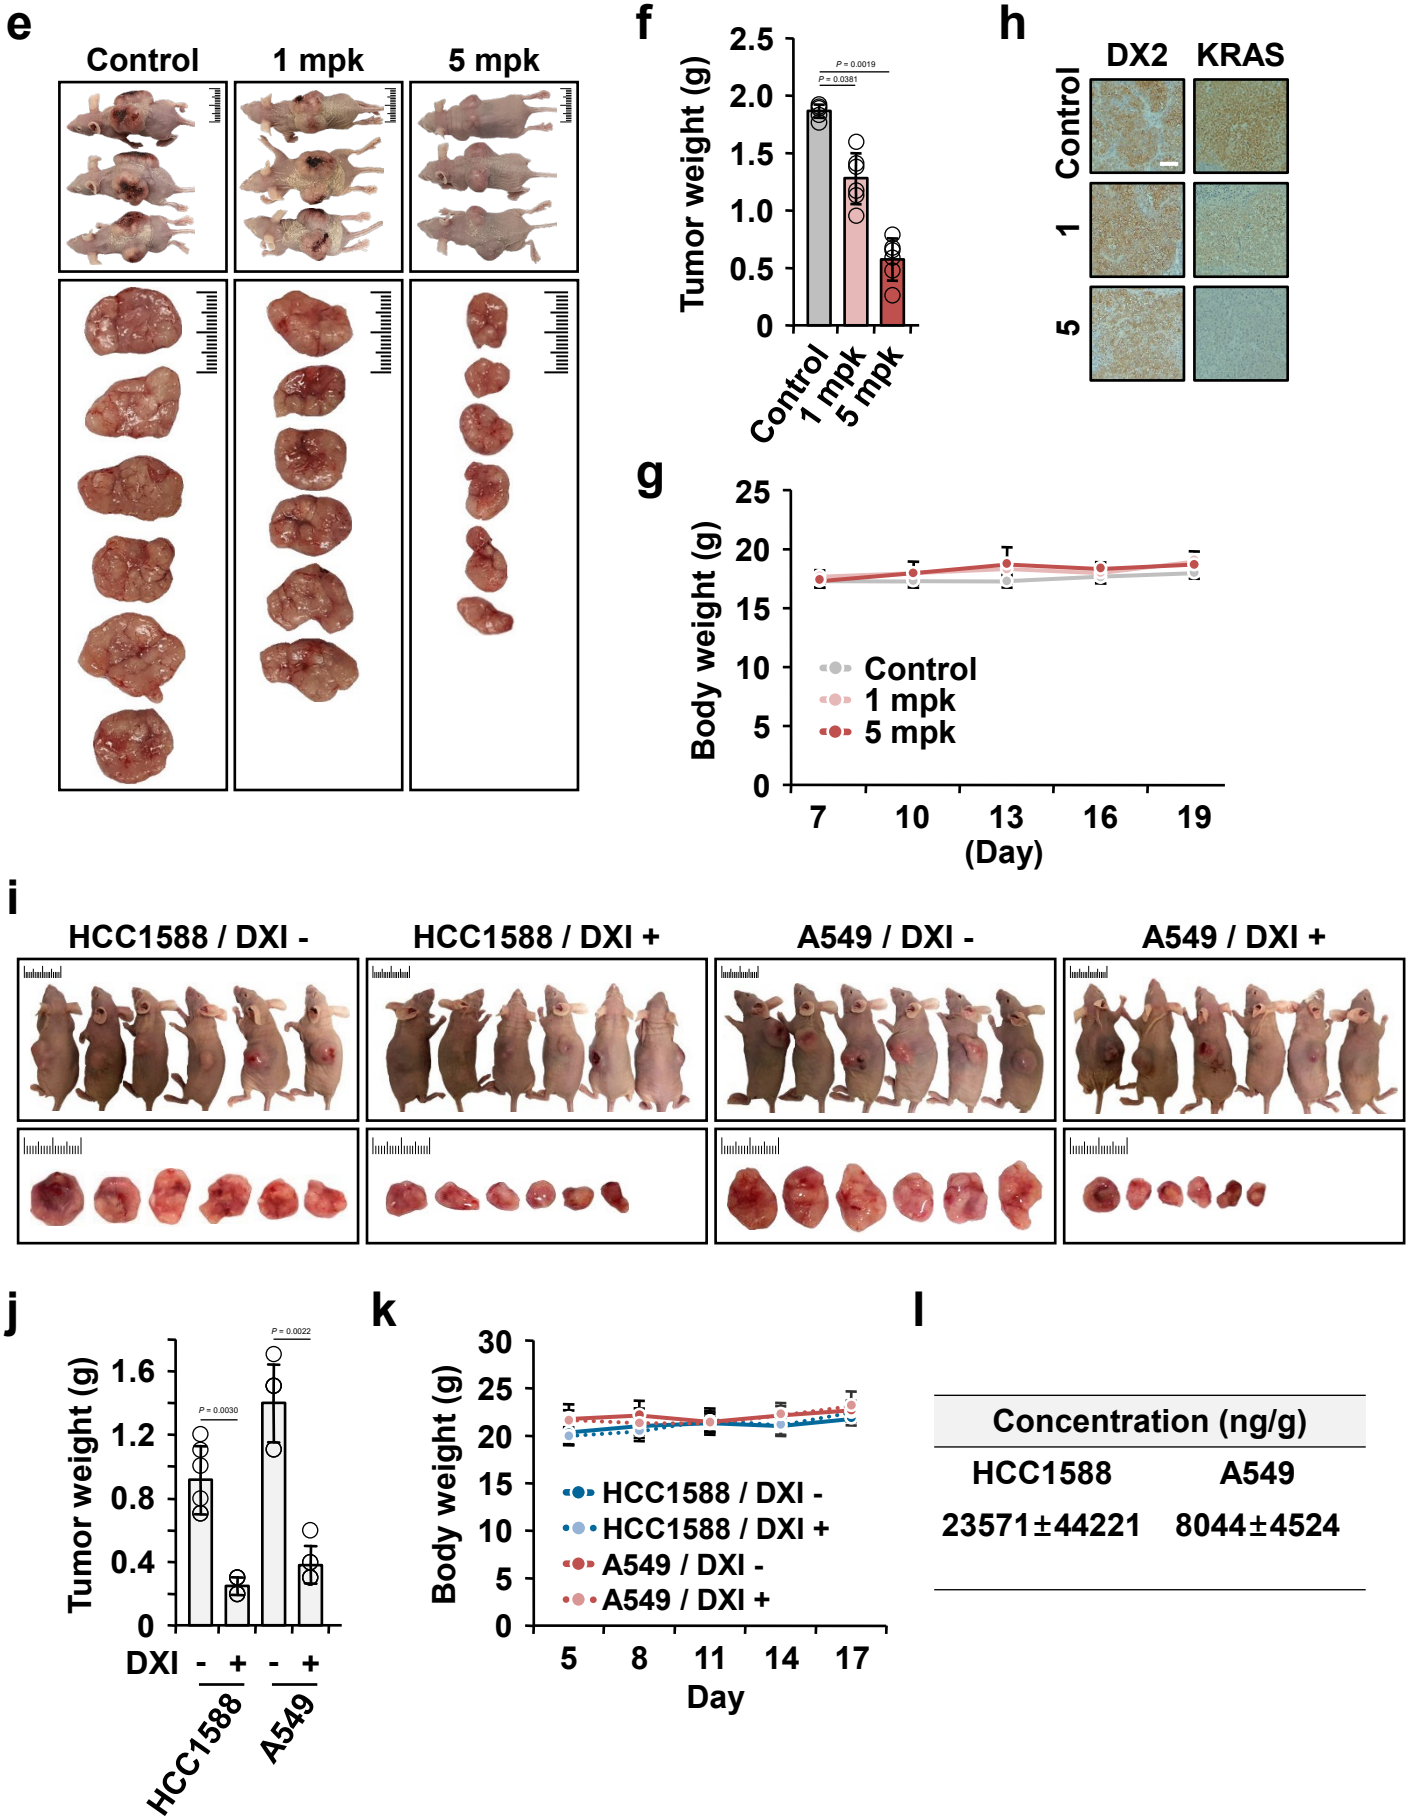

m

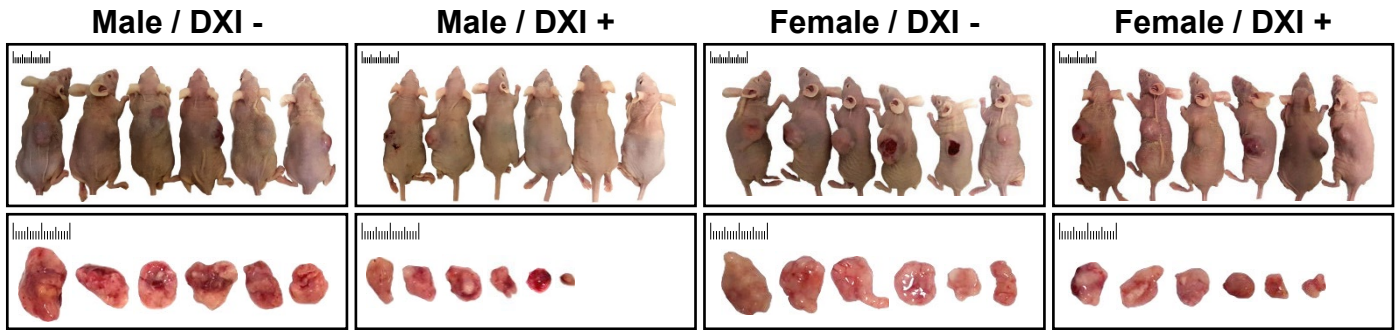

n

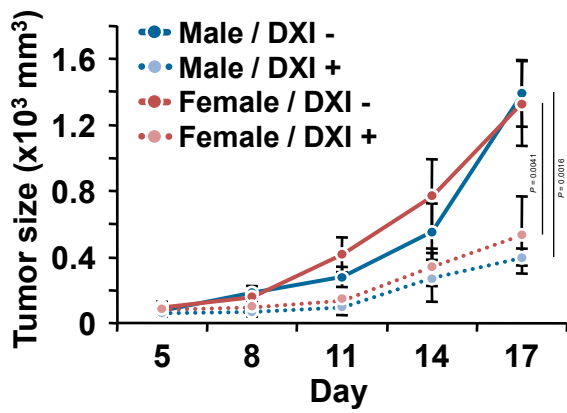

o

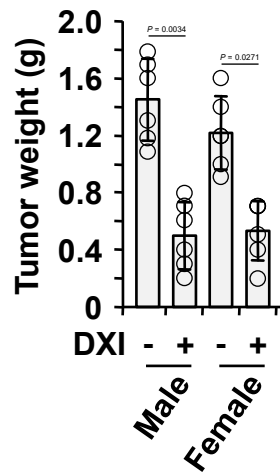

p

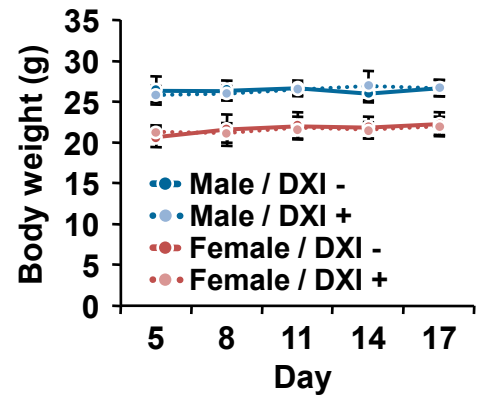

q

| Concentration (ng/g) |           |
|----------------------|-----------|
| Male                 | Female    |
| 11242±4654           | 7917±3165 |

**Supplementary Fig. 12 Suppression of the cell viability in a DX2-dependent manner via BC-DXI-32982.** **a** Lung, colorectal, and pancreatic cell lines were treated with DXI in dose-dependent manner for 96 h and subjected to the MTT assay. The  $EC_{50}$  values of DXI for cell viability were calculated and are presented in the table (bottom). The  $EC_{50}$  value of each cell line is shown as a heat map (Fig. 5g). N.D. denotes “not determined”. **b** DXI was treated to un-transformed MEF and cell viability was measured as described above. **c** H460, HCC1588, H1650, and A549 cells were treated with DXI and subjected to SDS-PAGE and immunoblotting using the indicated antibodies. **d** Indicated proteins in cell extracts from the above four cells were analyzed using their specific antibodies. **e-h**, *In vivo* effects of DXI on the tumor growth. Mice ( $n = 3$ ) xenografted with H460 cells on the left and right backs were injected intraperitoneally with DXI (1 or 5 mg/kg) five times in 12 d. Images of the tumor-embedded mice ( $n = 3$ ) and excised tumors ( $n = 6$ ) are shown (**e**), along with the weight of the excised tumors (**f**). Body weights were measured for the stated experimental periods and are represented as a line graph (**g**). All error bars represent the standard deviation (S.D.). DX2 and KRAS levels in the excised tumors were analyzed by immunohistochemistry using their specific antibodies, and the images were obtained from different sites in the same tissue (scale bar = 400  $\mu$ m). (**h**). **i-l** *In vivo* efficacy of DXI on the growth of tumors harboring the KRAS WT or mutation. HCC1588 or A549 cells were xenografted on one side back of mice ( $n = 6$ ) and DXI was intravenously injected five times for 12 d. Images of tumor-bearing mice and the excised tumors were shown (**i**). The harvested tumor (**j**) and body weights (**k**) were measured. All error bars represent the standard deviation (S.D.). *P*-value is from the two-sided t-test. DXI levels in the excised tumors were analyzed and shown (**l**). **m-q**, Evaluation of DXI on sex as a biological variable (SABV). DXI was intravenously injected into male and female mice ( $n = 6$ ) xenografted with H460 cells five times for 12 d. Images were obtained as above (**m**). Tumor sizes (**n**) and body weights (**p**) were measured throughout the overall experimental periods. The excised tumors were also weighed (**o**). All error bars represent the standard deviation (S.D.). *P*-value is from the two-sided t-test. Chemical concentrations of the harvested tumors were determined (**q**). **a, b** All the experiments were independently repeated thrice and error bars denote the S.D. Data are presented as mean values  $\pm$  S.D. Source data are provided as a Source data file. **c-d, h** Results are representative of at least three independent experiments.

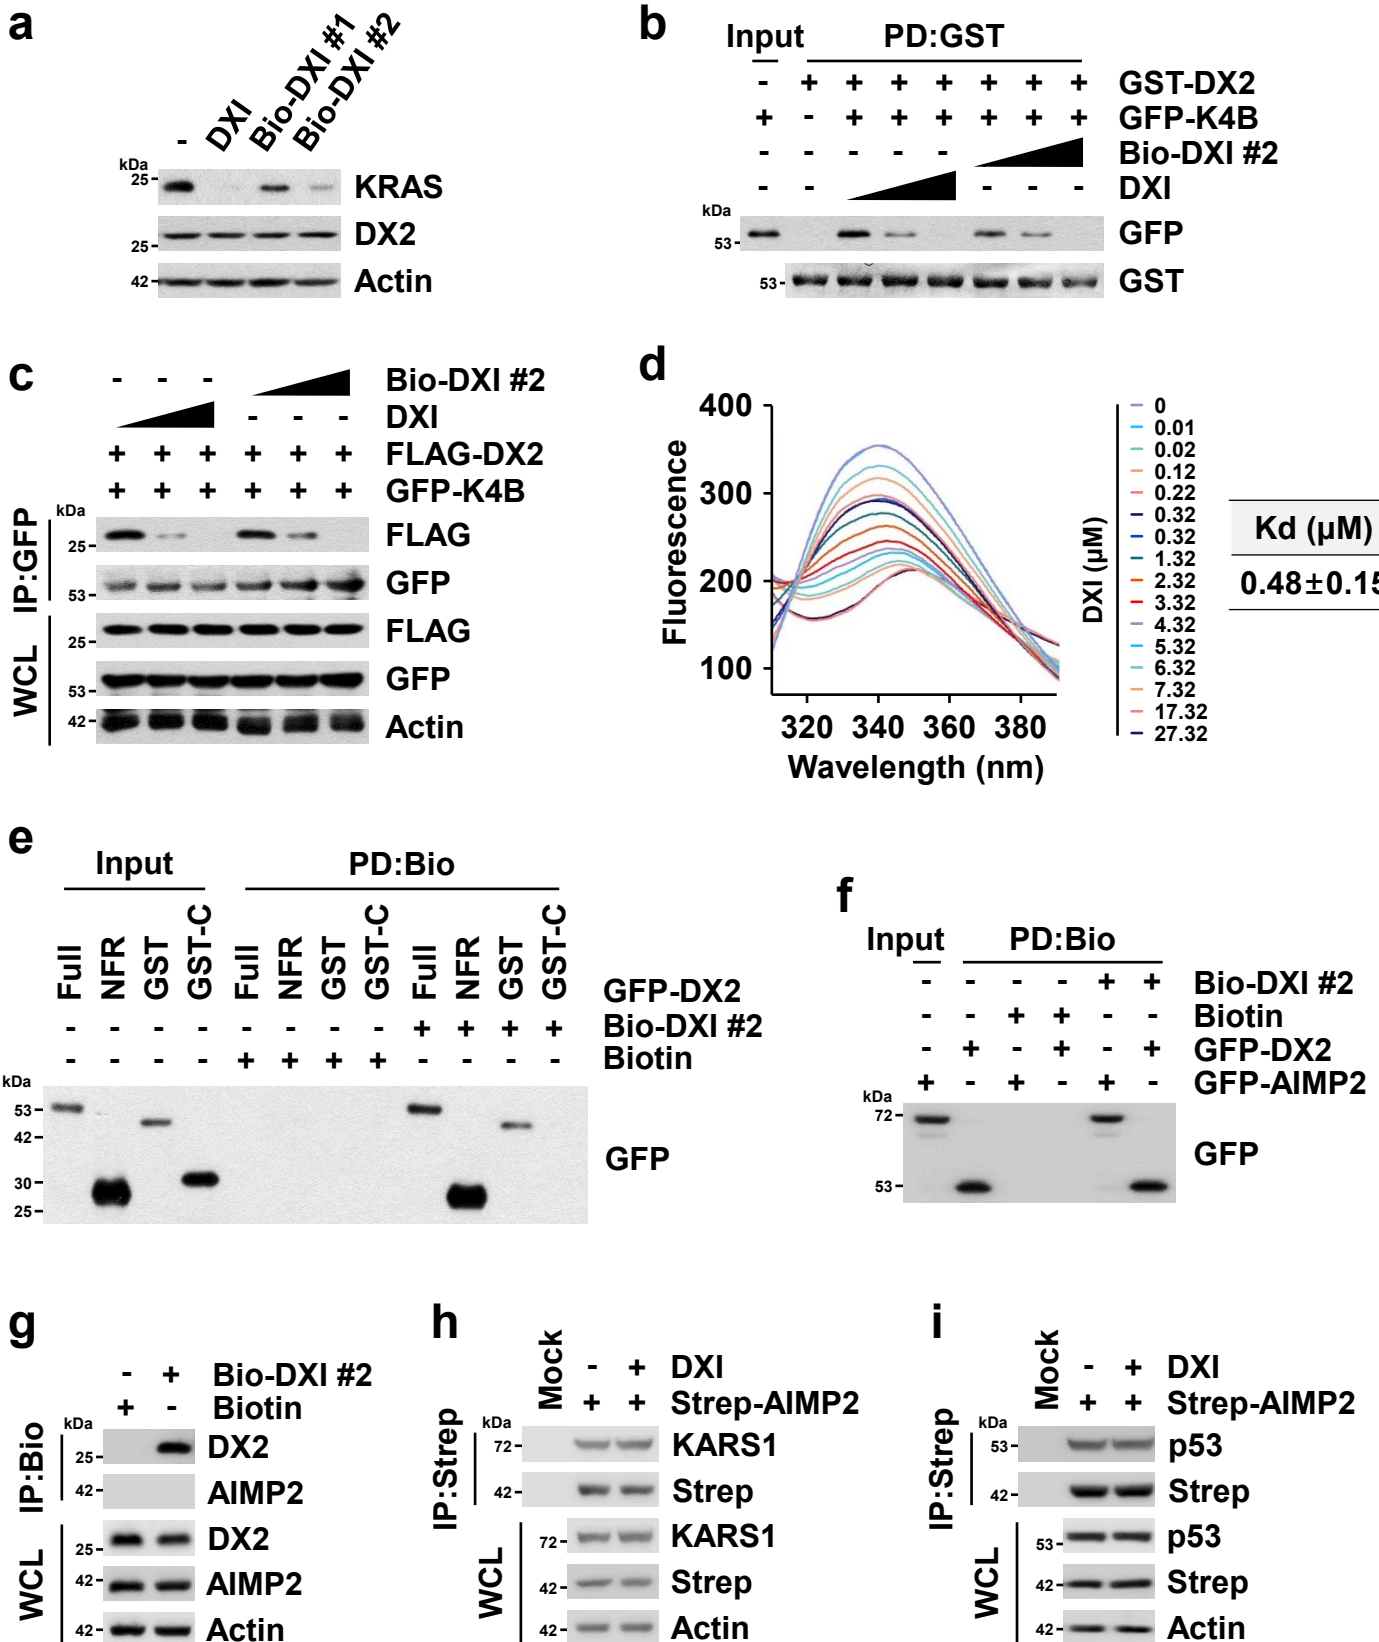

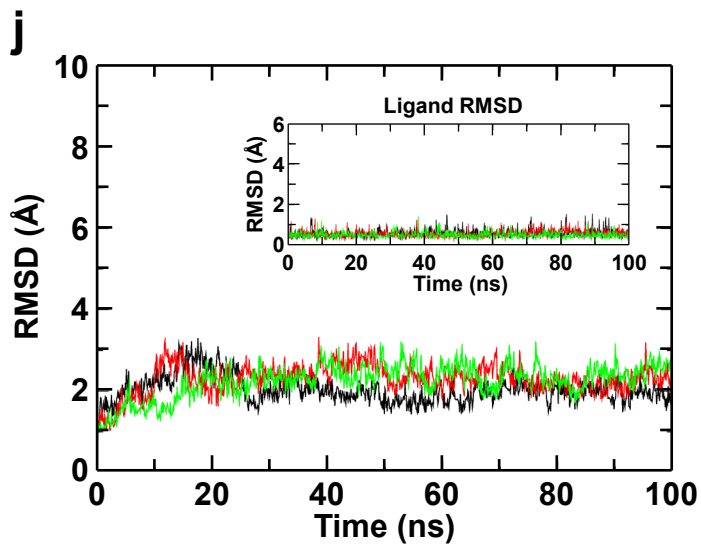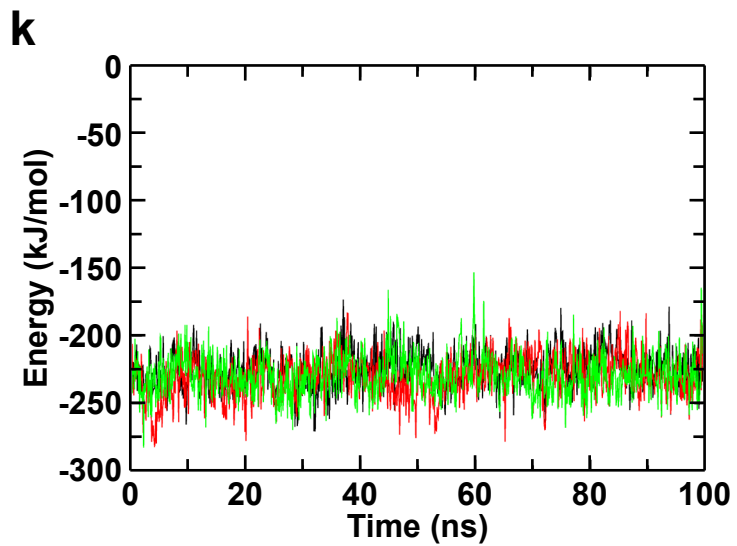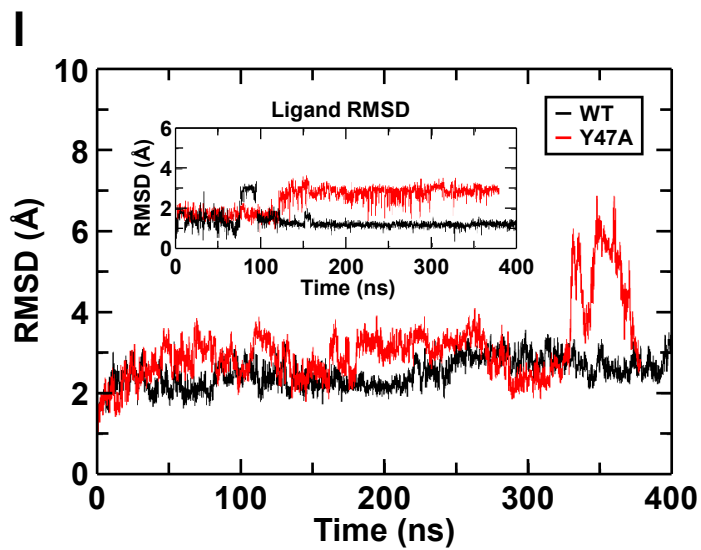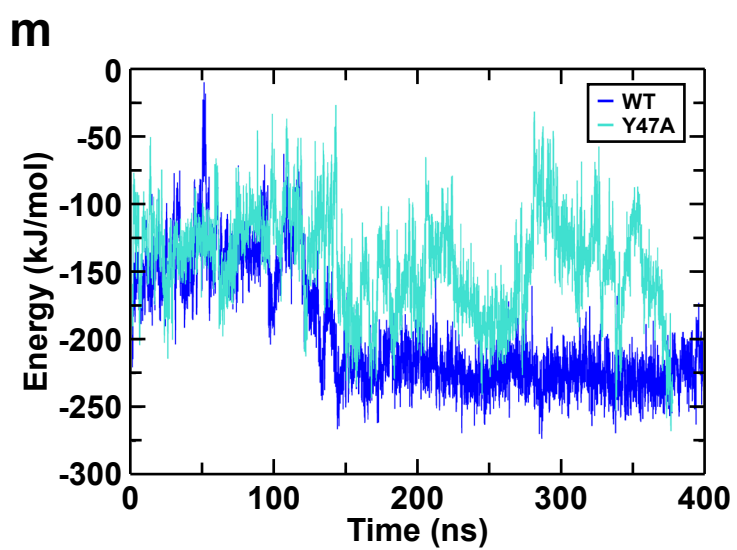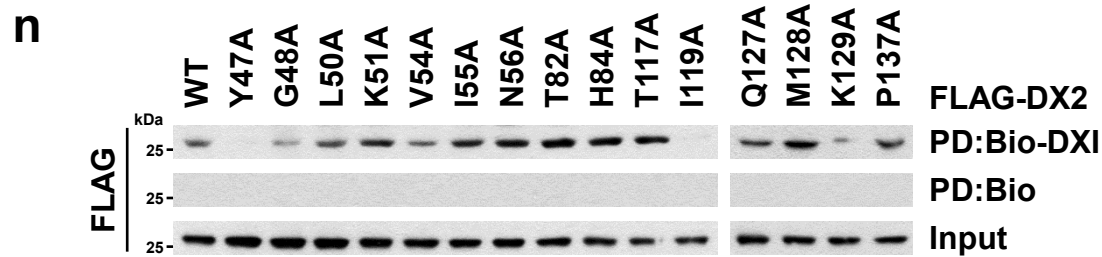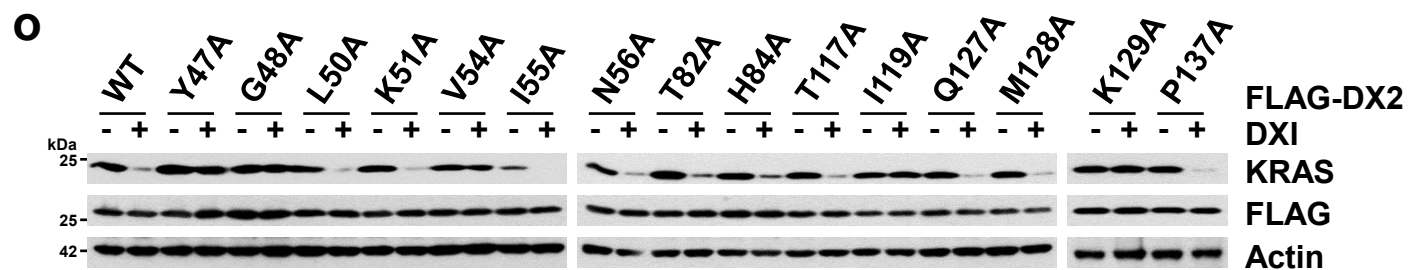

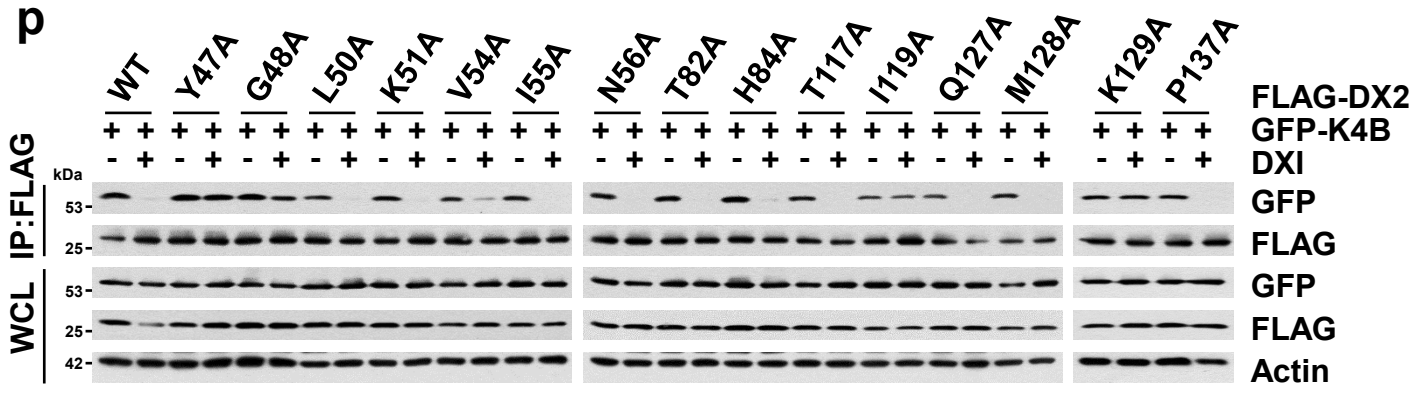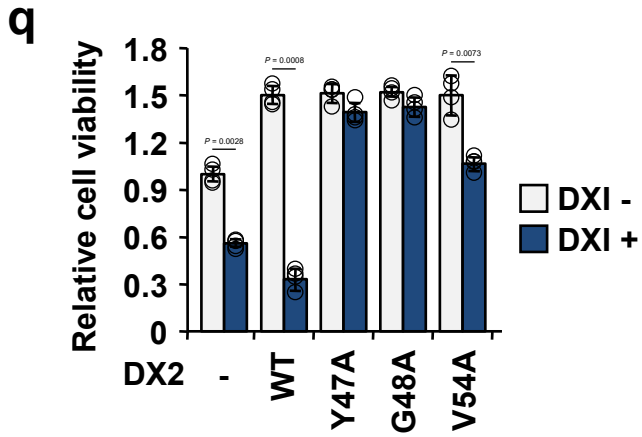



**Supplementary Fig. 13 Determination of the suppressive mode of action of BC-DXI-32982 on the DX2-KRAS binding.** **a-c** Validation of the effect of two biotin-conjugated DXIs (Bio-DXI #1 and #2) on DX2 levels (**a**), *in vitro* binding of DX2-KRAS4B (**b**), and cellular binding of two proteins (**c**). H460 cells were treated DXI or two other Biotin-DXIs (#1 and #2) and subjected to immunoblotting (**a**). Various concentration of Biotin-DXI #2 or DXI were added to a mixture of purified GST-DX2 protein and cell lysates containing GFP-KRAS4B. After precipitation with glutathione-Sepharose beads, precipitates were subjected to SDS-PAGE and immunoblotting. GST-DX2 proteins were detected by Coomassie staining (**b**). The 293T cells expressing FLAG-DX2 and GFP-KRAS4B were treated with Biotin-DXI #2 or DXI in a dose-dependent manner for 4 h and precipitated with the anti-GFP antibody (**c**). **d** The binding affinity of DXI to DX2 was determined by fluorescence-based binding titration measurements. The calculated  $K_d$  value is shown ( $n = 1$ ). **e** Biotin-DXI #2 was mixed with the lysates including GFP-DX2 full length (Full), NFR, GST, and GST-C. Precipitates with streptavidin-Sepharose beads were subjected to SDS-PAGE and western blotting using the anti-GFP antibody. Biotin was used as a negative control for Biotin-DXI. **f** The cell lysates expressing GFP-DX2 or -AIMP2 were mixed with Biotin-DXI #2 and subjected to *in vitro* pull-down as described above. **g** H460 cells were treated with Biotin-DXI #2 and subjected to immunoprecipitation using streptavidin-Sepharose beads. **h** The 293T cells expressing Strep-AIMP2 were treated with DXI. Lysyl-tRNA synthetase 1 (KARS1) co-precipitated with AIMP2 was determined by SDS-PAGE and immunoblotting. **i** Binding of p53 to AIMP2 in the same cells as above was analyzed by immunoprecipitation. **j**  $\alpha$ -RMSD of DX2 and ligand RMSD of DXI (inset) obtained from three replicate simulations of the DX2 and DXI complex started from the representative snapshot at 371.2 ns. **k** Non-bonded interaction energy of the DX2 and KRAS4B complex from the three replicates. **l**  $\alpha$ -RMSD of DX2 and ligand RMSD of DXI (inset) for the WT (black) and Y47A (red) obtained from MD simulation of the DX2 and DXI complex. **m** Interaction energy of the three replicates between DX2 and KRAS4B. **n** The 293T cell lysates containing FLAG-DX2 mutants were mixed with Biotin-DXI and subjected to the *in vitro* pull-down assay. **o** H460 cells expressing FLAG-DX2 mutants were treated with DXI for 18 h and subjected to immunoblotting using the anti-KRAS and FLAG antibodies. **p** The 293T cells ectopically expressing the FLAG-DX2 mutants and GFP-KRAS4B were cultured in a medium with DXI for 4 h and immunoprecipitated using the anti-FLAG antibody. **q** A549 cells stably expressing the DX2 mutants were treated with DXI for 96 h. Cell viability was determined by the MTT assay and presented as a bar graph. Experiments were independently repeated thrice and error bars denote three S.D. Data are presented as mean values  $\pm$  S.D. *P*-value is from the two-sided t-test. Source data are provided as a Source data file. **a-c**, **e-i**, **n-p** Results are representative of at least three independent experiments.

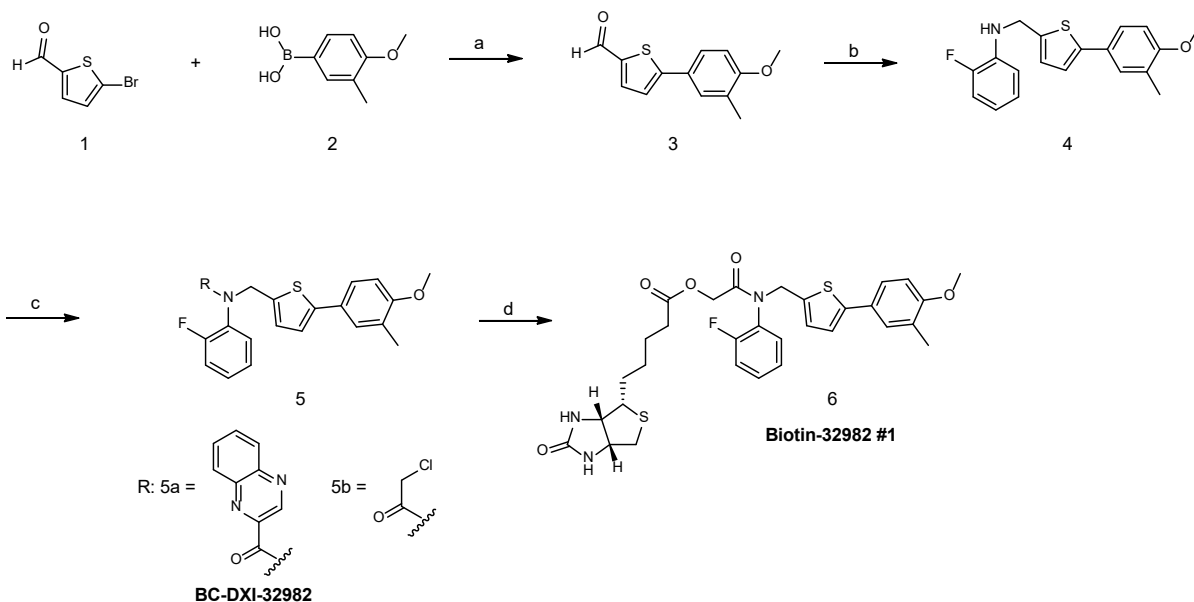

**Supplementary Fig. 14 Scheme 1 for synthesis of BC-DXI-32982 and Biotin-32982 #1<sup>a</sup>**

**Reagents and conditions:** (a) Pd(dppf)Cl<sub>2</sub>.CH<sub>2</sub>Cl<sub>2</sub> ([1,1'-Bis(diphenylphosphino)ferrocene]dichloropalladium(II), complex with dichloromethane), K<sub>3</sub>PO<sub>4</sub> (Potassium phosphate), DMF (*N,N*-dimethylformamide):H<sub>2</sub>O (4:1) mixture, 100 °C, 2 h; (b) 2-fluoroaniline, cat (catalytic). acetic acid, CH<sub>2</sub>Cl<sub>2</sub> (Dichloromethane), NaCNBH<sub>3</sub> (Sodium cyanoborohydride), MeOH (Methanol), 12 h; (c) 2-quinoxaloyl chloride for **5a** and chloroacetyl chloride for **5b**, TEA (Triethylamine), CH<sub>2</sub>Cl<sub>2</sub>, 0 °C to rt (Room temperature), 12 h; (d) K<sub>2</sub>CO<sub>3</sub> (Potassium carbonate), cat. KI (Potassium iodide), D-biotin, DMF, 12 h.

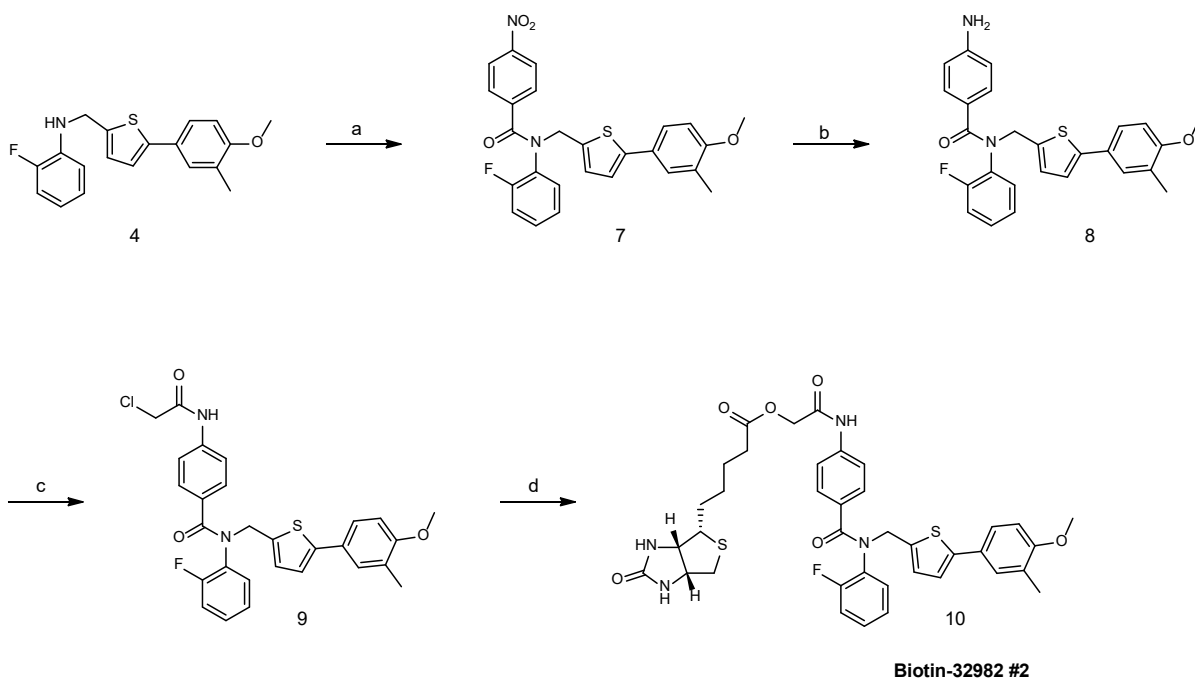

Biotin-32982 #2

**Supplementary Fig. 15 Scheme 2 for synthesis of Biotin-32982 #2<sup>a</sup>** <sup>a</sup>Reagents and conditions: (a) 4-nitrobenzoyl chloride, TEA, CH<sub>2</sub>Cl<sub>2</sub>, 0 °C to rt, 12 h; (b) H<sub>2</sub>, 10% Pd/C (Palladium on carbon), EtOAc (Ethyl acetate), 12 h; (c) chloroacetyl chloride, TEA, CH<sub>2</sub>Cl<sub>2</sub>, 0 °C to rt, 12 h; (d) K<sub>2</sub>CO<sub>3</sub>, cat. KI, D-biotin, DMF, 12 h.

# Supplementary Note 1

## Pharmacokinetics of BC-DXI-32982

Male ICR mice (8 weeks old, 30~35 g) were acclimated to the testing facility in a temperature and humidity-controlled condition for approximately a week prior to the study. Dosing solutions made up to 1 mg/mL in dimethylacetamide/Tween 80/water (10/10/80 vol%) were dosed orally and by tail vein injection to the animals, respectively. The dosing solutions were administered via oral gavage at a dose of 10 mg/kg and a dose volume of 10 mL/kg or via tail vein injection at a dose of 5 mg/kg and a dose volume of 5 mL/kg, respectively. About 40µL of blood samples were collected into BD Microtainer plasma separator tubes at selected times through the saphenous vein over 24 hr post-dosing. Blood samples were centrifuged at 6,000 x g for 5 min to separate plasma and stored in a freezer until analyzed. Protein precipitation was conducted on 15 µL aliquot of plasma samples with 3 volumes of acetonitrile containing diclofenac as analytical internal standard and the mixture was vortexed. After centrifugation at 3,000xg for 30 min at 4°C, a 50 µL aliquot of supernatant was transferred to a 96-well plate and mixed with 50 µL of water. The resulting solutions were analyzed by Agilent 6460 QQQ LC-MS/MS system in a positive MRM mode.

## Analytical method

1) Instrument: Agilent 6460 QQQ LC-MS/MS system equipped with dual AJS ESI ion source and Agilent 1200 series HPLC system

2) Data acquisition: positive MRM mode

BC-DXI-32982: m/z 506 > 217 (tR: 5.17 min); Diclofenac (IS): m/z 296 > 214 (tR: 4.61 min)

3) Column: Agilent Eclipse Plus C18, 3.5 µm, 2.1 x 100 mm

4) Mobile phase: linear gradient with 0.1% formic acid in de-ionized water (A) and 0.1% formic acid in acetonitrile (B)

| Time (min) | %A | %B |
|------------|----|----|
| 0          | 95 | 5  |
| 2          | 95 | 5  |
| 3          | 5  | 95 |
| 8          | 5  | 95 |

5) Flow rate: 0.45 mL/min

6) Column temp.: 40°C

7) Injection vol.: 5 µL

## Data analysis

The concentrations were determined from acquired MRM data using Agilent Mass Hunter Quantitative Analysis QQQ (ver. B.05.00). The chromatograms and full mass and MS/MS spectra were extracted using Qualitative Analysis Software.

## Results

1) Plasma concentration of BC-DXI-32982 following a single IV and PO dose in mice

| Time (hr) | Plasma concentration (ng/mL) |               |
|-----------|------------------------------|---------------|
|           | IV (5 mg/kg)                 | PO (10 mg/kg) |

|       |               |           |
|-------|---------------|-----------|
| 0.083 | 3463.1±1279.9 | Missing   |
| 0.17  | 766.5±137.9   | 8.8±7.2   |
| 0.25  | 451.5±187.7   | Missing   |
| 0.33  | Missing       | 28.6±14.1 |
| 0.5   | 240.3±136.7   | 35.9±21.5 |
| 1     | 127.6±78.9    | 4.0±2.1   |
| 2     | 16.8±15.0     | < 3.9     |
| 4     | 4.0           | < 3.9     |
| 6     | < 3.9         | < 3.9     |
| 8     | < 3.9         | < 3.9     |
| 24    | < 3.9         | < 3.9     |

2) Plasma Pharmacokinetics of BC-DXI-32982 following a single IV and PO dose in mice

| Parameter                     | IV (5 mg/kg)   | PO (10 mg/kg) |
|-------------------------------|----------------|---------------|
| t <sub>1/2</sub> (h)          | 0.5 ± 0.2      | 0.3           |
| t <sub>max</sub> (h)          | NA             | 0.4 ± 0.1     |
| C <sub>max</sub> (ng/mL)      | NA             | 38.9 ± 18.7   |
| AUC <sub>last</sub> (ng·h/mL) | 1282.7 ± 528.2 | 19.2 ± 7.4    |
| AUC <sub>inf</sub> (ng·h/mL)  | 1287.2 ± 526.8 | 15.4          |
| MRT (h)                       | 0.2 ± 0.1      | 0.6           |
| V <sub>z</sub> (L/kg)         | 3.5 ± 2.9      | NA            |
| CL (L/h/kg)                   | 4.4 ± 1.8      | NA            |
| V <sub>ss</sub> (L/kg)        | 1.2 ± 0.9      | NA            |
| F (%)                         | NA             | 0.7 ± 0.3     |

PK parameters were calculated by non-compartment analysis using PKSolver. PK parameters requiring terminal elimination rate constant (k), such as t<sub>1/2</sub>, AUC<sub>inf</sub> and MRT(h) could not be determined due to lack of terminal phase in the plasma concentration-time curves. NA: not applicable. ND: not determined.

## Analysis of BC-DXI-32982 in Tumor Tissues excised from mice

### Analytical method

1) Pretreatment of tissue: Tumor tissues were homogenized in buffer and diluted with acetonitrile following vortexing for 10 min and centrifugation (15,000 rpm, 4 °C) for 10 min. The supernatant was transferred to LC vial for analysis.

### 2) LC-MS/MS

- Instrument: Mass spectrometry (Agilent 6460) with HPLC (Agilent 1200)

- Elution condition: Column (UK-C18, 100 X 2 mm, 3 µm, UNISON, 35 °C); Mobile Phase A (10 mM ammonium formate in water), Mobile Phase B (100% acetonitrile)

- Flow rate: 0.35 mL/min, Total run time: 5.5 min, Injection volume: 5 µL

| Time (min) | %A | %B  |
|------------|----|-----|
| 0.00       | 80 | 20  |
| 0.30       | 80 | 20  |
| 2.30       | 0  | 100 |
| 2.50       | 0  | 100 |
| 2.60       | 80 | 20  |
| 5.50       | 80 | 20  |

3) Source/ Gas parameters: ion source (ESI); GasTemp (350 °C); Gas flow (10 L/min); Nebulizer (45 psi)

4) Internal standard: disopyramide

5) Detector: EMV 1850

## Result

| Concentration of BC-DXI-32982 (ng/g) |             |              |             |
|--------------------------------------|-------------|--------------|-------------|
| HCC1588                              | A549        | Male         | Female      |
| 23571 ± 44421                        | 8044 ± 4524 | 11242 ± 4654 | 7917 ± 3165 |

## Panel Screen on BC-DXI-32982

### Analytical method

SafetyScreen44-Panlabs serviced by eurofins was performed.

#### 1) Cholinesterase, Acetyl, ACES (104010)

- Source: Human recombinant HEK-293 cells
- Substrate: 700 µM Acetylthiocholine
- Vehicle: 1.0% DMSO
- Significance Criteria: ≥50% of max stimulation or inhibition
- Pre-Incub. Time/Temp: 15 minutes @ 25°C
- Incubation Time/Temp: 20 minutes @ 25°C
- Incubation Buffer: 0.1 M Sodium Phosphate, pH 7.4
- Quantitation Method: Spectrophotometric quantitation of Thiocholine

#### 2) Adrenergic $\beta_2$ (204110)

- Source: Human recombinant CHO cells
- Vehicle: 1.0% DMSO
- Incubation Time/Temp: 60 minutes @ 25°C
- Incubation Buffer: 50 mM Tris-HCl, pH 7.4, 0.5 mM EDTA, 5.0 mM MgCl<sub>2</sub>, 120 mM

NaCl



- Kd: 0.44 nM
- Ligand: 0.2 nM [<sup>3</sup>H] CGP-12177
- Non-Specific Ligand: 10.0 μM ICI-118551
- Specific Binding: 95%
- Quantitation Method: Radioligand Binding
- Significance Criteria: ≥50% of max stimulation or inhibition
- Bmax: 0.44 pmole/mg Protein

### 3) Calcium Channel L-Type, Dihydropyridine (214600)

- Source: Wistar Rat cerebral cortex
- Vehicle: 1.0% DMSO
- Incubation Time/Temp: 90 minutes @ 25°C
- Incubation Buffer: 50 mM Tris-HCl, pH 7.4
- Kd: 0.18 nM
- Ligand: 0.1 nM [<sup>3</sup>H] Nitrendipine
- Non-Specific Ligand: 1.0 μM Nitrendipine
- Specific Binding: 91%
- Quantitation Method: Radioligand Binding
- Significance Criteria: ≥50% of max stimulation or inhibition
- Bmax: 0.23 pmole/mg Protein

### 4) Cholecystokinin CCK<sub>1</sub> (CCK<sub>A</sub>) (218030)

- Source: Human recombinant 1321-N1 cells
- Vehicle: 1.0% DMSO
- Incubation Time/Temp: 3 hours @ 25°C

- Incubation Buffer: 50 mM HEPES, pH 7.4, 5 mM MgCl<sub>2</sub>, 1 mM CaCl<sub>2</sub>, 0.1% BSA
- Kd: 0.59 nM
- Ligand: 0.11 nM [<sup>125</sup>I] CCK-8
- Non-Specific Ligand: 1.0 μM L-364,718
- Specific Binding: 85%
- Quantitation Method: Radioligand Binding
- Significance Criteria: ≥50% of max stimulation or inhibition
- Bmax: 2.30 pmole/mg Protein

#### 5) Sodium Channel, Site 2 (279510)

- Source: Wistar Rat brain (minus cerebellum)
- Vehicle: 1.0% DMSO
- Incubation Time/Temp: 60 minutes @ 37°C
- Incubation Buffer: 50 mM HEPES, 50 mM Tris-HCl, pH 7.4, 130 mM Choline Chloride, 5.4 mM KCl, 0.8 mM MgCl<sub>2</sub>, 5.5 mM Glucose, 40 μg/mL LqTX
- Kd: 0.052 μM
- Ligand: 5.0 nM [<sup>3</sup>H] Batrachotoxinin
- Non-Specific Ligand: 100 μM Veratridine
- Specific Binding: 77%
- Quantitation Method: Radioligand Binding
- Significance Criteria: ≥50% of max stimulation or inhibition
- Bmax: 0.7 pmole/mg Protein

## Result

Among 44 assays using 10  $\mu$ M of BC-32982, significant responses above 50% inhibition were noted in 5 primary assays listed below.

| Cat #  | Assay names                                          | Species | Conc.      | % Inh. |
|--------|------------------------------------------------------|---------|------------|--------|
| 104010 | Cholinesterase, Acetyl, ACES                         | Hum     | 10 $\mu$ M | 66     |
| 204110 | Adrenergic $\beta_2$                                 | Hum     | 10 $\mu$ M | 55     |
| 214600 | Calcium Channel L-Type, Dihydropyridine              | Rat     | 10 $\mu$ M | 63     |
| 218030 | Cholecystokinin CCK <sub>1</sub> (CCK <sub>A</sub> ) | Hum     | 10 $\mu$ M | 54     |
| 279510 | Sodium Channel, Site 2                               | Rat     | 10 $\mu$ M | 75     |

## **In vivo toxicity by 14 day repeated treatment of BC-DXI-32982**

### **Analytical method**

- 1) Animal: ICR male mice
- 2) Administration: Tale intravenous (IV) injection once a day for 14 days
- 3) Dosage: Vehicle, 10 mg/kg, 50 mg/kg (5 mice per each treated group)
- 4) Dosing solution: 1 mg/mL in dimethylacetamide/Tween 80/water (10/10/80 vol%)
- 5) Observation
  - Clinical pathology: Blood and biochemical analysis
  - Organ and Tissue: Lung, brain, liver, kidney, stomach, spleen and thymus

### **Results**

- 1) Mean body weight over time: No significant difference between vehicle and chemical treated groups
- 2) Mortality: No death
- 3) Clinical signs: No abnormalities detected

#### 4) Hematology

- In 50 mg/kg treated group, there was a tendency that AST and ALT was increased without significance

- In 50 mg/kg treated group, LUC and monocyte were significantly increased

#### 5) Macroscopic Findings: No significant abnormalities detected

6) Organ weight: There was a tendency that liver weight with gallbladder seemed to be increased without significance.

#### 7) Microscopic Findings

- Liver: Hypertropy of hepatocyte was observed in 10 and 50 mg/kg treated group

- Lung: Infiltration of missed cell was observed in 50 mg/kg treated group

## Supplementary Note 2

### Experimental Procedures

#### Chemistry. General.

All the commercial chemicals were of reagent grade and were used without further purification. Solvents were dried with standard procedures. All the reactions were carried out under an atmosphere of dried argon in flame-dried glassware. The proton nuclear magnetic resonance ( $^1\text{H-NMR}$ ) spectra were determined on a Varian (400 MHz) spectrometer (Varian Medical Systems, Inc., Palo Alto, CA, USA).  $^{13}\text{C-NMR}$  spectra were recorded on a Varian (100 MHz) spectrometer. Multiplicities of NMR signals were reported using different abbreviations like singlet (s), doublet (d), triplet (t), quartet (q) and multiplet (m). The chemical shifts are provided in parts per million (ppm) downfield with coupling constants in hertz (Hz).  $^{19}\text{F}$  NMR spectra were recorded on a Varian (376 MHz) spectrometer. The mass spectra were recorded using high-resolution mass spectrometry (HRMS) (electron ionization MS) obtained on a JMS-700 mass spectrometer (Jeol, Japan) or using HRMS (electrospray ionization MS) obtained on a G2 QTOF mass spectrometer. Melting points were measured on a Fisherbrand digital melting point apparatus. The products from all the reactions were purified by flash column chromatography using silica gel 60 (230–400 mesh Kieselgel 60). Additionally, thin-layer chromatography on 0.25-mm silica plates (E. Merck; silica gel 60 F254) was used to monitor reactions. Final product purity was checked by reversed phase high-pressure liquid chromatography (RP-HPLC), performed on a Waters Corp. HPLC system equipped with an ultraviolet (UV) detector set at 254 nm. The mobile phases used were: (A)  $\text{H}_2\text{O}$  containing 0.05% trifluoroacetic acid; and (B)  $\text{CH}_3\text{CN}$ . HPLC employed a YMC Hydrosphere C18 (HS-

302) column (5- $\mu\text{m}$  particle size, 12-nm pore size) that was 4.6 mm in diameter  $\times$  150 mm in size with a flow rate of 1.0 mL/min. Compound purity was assessed using the following method:  $\text{CH}_3\text{CN}$ :0.05% TFA in  $\text{H}_2\text{O}$  from 25:75 to 100:0. The purity of all biologically evaluated compounds was >99%.

### 5-(4-Methoxy-3-methylphenyl)thiophene-2-carbaldehyde (**3**)

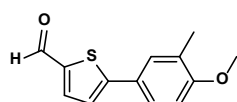

$\text{Pd}(\text{dppf})\text{Cl}_2 \cdot \text{CH}_2\text{Cl}_2$  (0.42 g, 0.52 mmol) was added to a degassed solution of 5-bromothiophene-2-carboxaldehyde (**1**) (2.0 g, 10.4 mmol), 4-methoxy-3-methylphenylboronic acid (**2**) (2.08 g, 12.5 mmol), and  $\text{K}_3\text{PO}_4$  (4.44 g, 20.9 mmol) in  $\text{DMF}:\text{H}_2\text{O}$  (4:1) (20 mL). The reaction mixture was heated at 100  $^\circ\text{C}$  for 2 h. The reaction mass was cooled to rt, diluted with  $\text{H}_2\text{O}$  and extracted with  $\text{EtOAc}$ . The combined organic layer was washed with  $\text{H}_2\text{O}$ , brine, dried over  $\text{MgSO}_4$ , filtered and concentrated in vacuo. Purification by flash column chromatography (silica gel, 0 to 5%  $\text{EtOAc}$  in hexanes) gave **3** as a yellow solid (2.20 g, 90%).  $^1\text{H}$  NMR (400 MHz,  $\text{CDCl}_3$ )  $\delta$  9.85 (s, 1H), 7.70 (d,  $J = 4.0$  Hz, 1H), 7.49 (d,  $J = 8.4$  Hz, 1H), 7.45 (s, 1H), 7.29 (d,  $J = 4.0$  Hz, 1H), 6.86 (d,  $J = 8.8$  Hz, 1H), 3.87 (s, 3H), 2.26 (s, 3H); HRMS (ESI) ( $m/z$ ):  $[\text{M} + \text{H}]^+$  calcd (Calculated). for  $\text{C}_{13}\text{H}_{13}\text{O}_2\text{S}$ , 233.0636; found, 233.0626.

### 2-Fluoro-*N*-((5-(4-methoxy-3-methylphenyl)thiophen-2-yl)methyl)aniline (**4**)

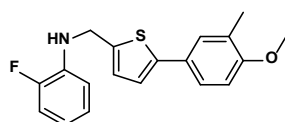

To a solution of aldehyde (**3**) (1.62 g, 6.97 mmol) and 2-fluoroaniline (0.56 mL, 5.79 mmol) in  $\text{CH}_2\text{Cl}_2$ , catalytic amount of acetic acid was added and reaction mixture

was stirred at rt till the complete formation of imine which was monitored by TLC (Thin-layer chromatography). After evaporating CH<sub>2</sub>Cl<sub>2</sub> under vacuum, the obtained residue was dissolved in MeOH, NaCNBH<sub>3</sub> (1.75 g, 27.9 mmol) was added and reaction mixture was stirred at rt for 12 h. After evaporating MeOH under vacuum, the reaction mixture was diluted with H<sub>2</sub>O and extracted with EtOAc. The combined organic layers were washed with H<sub>2</sub>O and brine, dried over MgSO<sub>4</sub>, and evaporated under vacuum to afford a crude product. Purification by flash column chromatography (silica gel, 0–5% EtOAc in hexanes) afforded **4** as a white solid (1.52 g, 67%). <sup>1</sup>H NMR (400 MHz, CDCl<sub>3</sub>) δ 7.35 (d, *J* = 8.8 Hz, 1H), 7.34 (s, 1H), 7.03–6.96 (m, 3H), 6.94 (d, *J* = 3.6 Hz, 1H), 6.80 (d, *J* = 8.0 Hz, 2H), 6.66 (q, *J* = 6.8 Hz, 1H), 4.53 (d, *J* = 5.6 Hz, 2H), 4.34 (br, 1H), 3.84 (s, 3H), 2.23 (s, 3H); HRMS (ESI) (*m/z*): [M + H]<sup>+</sup> calcd. for C<sub>19</sub>H<sub>19</sub>FNOS, 328.1171; found 328.1182.

***N*-(2-Fluorophenyl)-*N*-((5-(4-methoxy-3-methylphenyl)thiophen-2-yl)methyl)quinoxaline-2-carboxamide (5a) (BC-DXI-32982).**

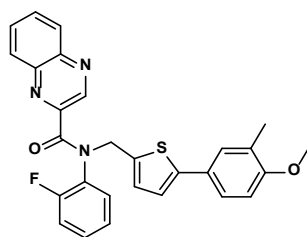

2-Quinoxaloyl chloride (0.35 g, 1.83 mmol) was added to a solution of compound **4** (0.30 g, 0.91 mmol) and triethylamine (0.26 mL, 1.83 mmol) in CH<sub>2</sub>Cl<sub>2</sub> at 0 °C under argon atmosphere. Reaction mixture was warmed to rt and stirred for 12 h. The reaction mixture was diluted with CH<sub>2</sub>Cl<sub>2</sub>, washed with sat (saturated). NaHCO<sub>3</sub>, H<sub>2</sub>O, brine, dried over MgSO<sub>4</sub> and concentrated in vacuo. Purification by flash column chromatography (silica gel, 0–25% EtOAc in hexanes) yielded **5a** as a dark yellow

solid (0.42 g, 94%). mp: 102–104 °C. <sup>1</sup>H NMR (400 MHz, CDCl<sub>3</sub>) δ 9.23 (s, 1H), 8.01 (d, *J* = 8.0 Hz, 1H), 7.72–7.60 (m, 3H), 7.36 (d, *J* = 7.2 Hz, 1H), 7.35 (s, 1H), 7.16–7.10 (m, 1H), 7.07 (td, *J* = 7.8, 1.4 Hz, 1H), 6.97 (d, *J* = 3.6 Hz, 1H), 6.95–6.90 (m, 2H), 6.84 (d, *J* = 3.6 Hz, 1H), 6.78 (d, *J* = 8.8 Hz, 1H), 5.57 (d, *J* = 14.8 Hz, 1H), 4.95 (d, *J* = 14.8 Hz, 1H), 3.81 (s, 3H), 2.22 (s, 3H); <sup>13</sup>C NMR (100 MHz, CDCl<sub>3</sub>) δ 166.3, 158.9, 157.4, 156.4, 147.1, 145.4, 144.7, 142.1, 140.1, 136.2, 131.2, 130.4, 130.2, 129.9, 129.8, 129.7, 129.5, 129.4, 129.0, 128.9, 128.2, 126.9, 126.5, 124.4, 124.3, 124.2, 121.0, 116.2, 116.0, 110.1, 55.4, 48.3, 16.2; <sup>19</sup>F NMR (376 MHz, CDCl<sub>3</sub>) δ -(121.12–121.18) (m); HRMS (ESI) (*m/z*): [M + H]<sup>+</sup> calcd. for C<sub>28</sub>H<sub>23</sub>FN<sub>3</sub>O<sub>2</sub>S, 484.1495; found, 484.1485; RP-HPLC purity 99.2% at 254 nm, R<sub>t</sub> = 24.6 min.

**2-Chloro-*N*-(2-fluorophenyl)-*N*-((5-(4-methoxy-3-methylphenyl)thiophen-2-yl)methyl)acetamide (5b)**

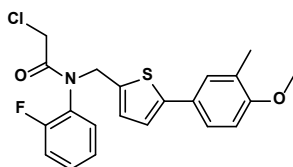

Chloroacetyl chloride (0.04 mL, 0.61 mmol) was slowly added to a solution of compound **4** (0.10 g, 0.30 mmol) and triethylamine (0.12 mL, 0.91 mmol) in CH<sub>2</sub>Cl<sub>2</sub> at 0 °C under argon atmosphere. Reaction mixture was warmed to rt and stirred for 12 h. The reaction mixture was diluted with CH<sub>2</sub>Cl<sub>2</sub>, washed with sat. NaHCO<sub>3</sub>, H<sub>2</sub>O, brine, dried over MgSO<sub>4</sub> and evaporated under vacuum to afford a crude product. Purification by flash column chromatography (silica gel, 0–20% EtOAc in hexanes) afforded **5b** as a colorless oil (75.0 mg, 61%). <sup>1</sup>H NMR (400 MHz, CDCl<sub>3</sub>) δ 7.41–7.33 (m, 3H), 7.21–7.07 (m, 3H), 6.95 (d, *J* = 3.6 Hz, 1H), 6.80 (d, *J* = 7.6 Hz, 1H), 6.72 (d, *J* = 3.6 Hz, 1H), 5.41 (d, *J* = 15.2 Hz, 1H), 4.56 (d, *J* = 14.8 Hz, 1H),



3.87 (d,  $J = 5.2$  Hz, 2H), 3.84 (s, 3H), 2.23 (s, 3H); HRMS (ESI) ( $m/z$ ):  $[M + H]^+$  calcd. for  $C_{21}H_{20}ClFNO_2S$ , 404.0887; found, 404.0881.

**2-((2-Fluorophenyl)((5-(4-methoxy-3-methylphenyl)thiophen-2-yl)methyl)amino)-2-oxoethyl 5-((3a*S*,4*S*,6a*R*)-2-oxohexahydro-1*H*-thieno[3,4-*d*]imidazol-4-yl)pentanoate (**6**) (Biotin-32982 #1)**

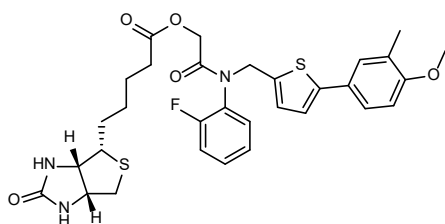

Compound **5b** (70.0 mg, 0.17 mmol) was added to a suspension of D-biotin (51.0 mg, 0.20 mmol), cat. KI, and  $K_2CO_3$  (72.0 mg, 0.52 mmol) in DMF and the reaction mixture was stirred at rt for 12 h under argon atmosphere. The reaction mixture was quenched with  $H_2O$  and extracted with EtOAc. The combined organic layers were washed with brine, dried over  $MgSO_4$  and concentrated. Purification by flash column chromatography (silica gel, 0–3% MeOH in  $CH_2Cl_2$ ) afforded **6** as a white solid (40.0 mg, 38%). mp: 73–75 °C.  $^1H$  NMR (400 MHz,  $CDCl_3$ )  $\delta$  7.41–7.32 (m, 3H), 7.22–7.12 (m, 3H), 6.94 (d,  $J = 3.6$  Hz, 1H), 6.80 (d,  $J = 8.4$  Hz, 1H), 6.73 (t,  $J = 2.8$  Hz, 1H), 5.97 (d,  $J = 24.4$  Hz, 1H), 5.37 (dd,  $J = 33.0, 15.0$  Hz, 1H), 5.01 (s, 1H), 4.60 (dd,  $J = 33.2, 15.2$  Hz, 1H), 4.54–4.48 (m, 1H), 4.41–4.25 (m, 3H), 3.84 (s, 3H), 3.15 (q,  $J = 6.4$  Hz, 1H), 2.96–2.88 (m, 1H), 2.76 (d,  $J = 12.8$  Hz, 1H), 2.53–2.36 (m, 2H), 2.22 (s, 3H), 1.79–1.70 (m, 4H), 1.56–1.45 (m, 2H);  $^{13}C$  NMR (100 MHz,  $CDCl_3$ )  $\delta$  173.2, 166.7, 163.7, 159.4, 157.5, 156.9, 145.2, 136.38, 136.33, 130.9, 130.8, 130.7, 128.65, 128.60, 128.2, 127.1, 127.0, 126.9, 126.6, 125.25, 125.22, 124.2, 121.1, 117.2, 116.9, 110.2, 61.8, 61.2, 60.2, 55.7, 55.4, 47.4, 40.5, 33.4, 28.2, 28.1, 24.8, 16.2;  $^{19}F$  NMR (376 MHz,  $CDCl_3$ )  $\delta$  -(120.24–120.27) (m); HRMS (ESI) ( $m/z$ ):

[M + H]<sup>+</sup> calcd. for C<sub>31</sub>H<sub>35</sub>FN<sub>3</sub>O<sub>5</sub>S<sub>2</sub>, 612.2002; found, 612.2012; RP-HPLC purity >99.9% at 254 nm, R<sub>t</sub> = 18.8 min.

***N*-(2-Fluorophenyl)-*N*-((5-(4-methoxy-3-methylphenyl)thiophen-2-yl)methyl)-4-nitrobenzamide (7)**

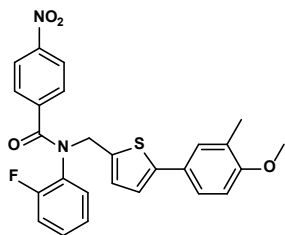

4-Nitrobenzoyl chloride (0.59 g, 3.20 mmol) was added to a solution of compound **4** (0.35 g, 1.06 mmol) and triethylamine (0.45 mL, 3.20 mmol) in CH<sub>2</sub>Cl<sub>2</sub> at 0 °C under argon atmosphere. Reaction mixture was warmed to rt and stirred for 12 h. The reaction mixture was diluted with CH<sub>2</sub>Cl<sub>2</sub>, washed with sat. NaHCO<sub>3</sub>, H<sub>2</sub>O, brine, dried over MgSO<sub>4</sub> and evaporated under vacuum to afford a crude product. Purification by flash column chromatography (silica gel, 0–20% EtOAc in hexanes) afforded **7** as yellow solid (0.46 g, 90%). <sup>1</sup>H NMR (400 MHz, CDCl<sub>3</sub>) δ 8.02 (d, *J* = 8.0 Hz, 2H), 7.51 (d, *J* = 8.8 Hz, 2H), 7.36 (d, *J* = 8.4 Hz, 1H), 7.35 (s, 1H), 7.21–7.16 (m, 1H), 6.99–6.95 (m, 4H), 6.80 (d, *J* = 8.0 Hz, 1H), 6.77 (d, *J* = 3.2 Hz, 1H), 5.50 (d, *J* = 14.8 Hz, 1H), 4.82 (d, *J* = 14.2 Hz, 1H), 3.83 (s, 3H), 2.23 (s, 3H); HRMS (ESI) (*m/z*): [M - H]<sup>-</sup> calcd. for C<sub>26</sub>H<sub>20</sub>FN<sub>2</sub>O<sub>4</sub>S, 475.1128; found, 475.1147.

***N*-(2-Fluorophenyl)-*N*-((5-(4-methoxy-3-methylphenyl)thiophen-2-yl)methyl)benzamide (8)**

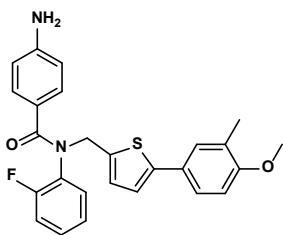

To a degassed solution of **7** (0.20 g, 0.42 mmol) in EtOAc, 10% Pd/C (10% w/w) (44.0 mg, 10 mol%) was slowly added and the reaction was stirred under hydrogen atmosphere overnight. After completion of the reaction, the reaction mass was filtered through a celite pad, concentrated and purified by flash column chromatography (silica gel, 0–30% EtOAc in hexanes) gave **8** as off white solid (0.13 g, 68%). <sup>1</sup>H NMR (400 MHz, CDCl<sub>3</sub>) δ 7.33 (d, *J* = 7.2 Hz, 2H), 7.25 (s, 1H), 7.20 (d, *J* = 8.8 Hz, 1H), 7.16–7.10 (m, 1H), 6.98 (q, *J* = 8.8 Hz, 1H), 6.97–6.89 (m, 3H), 6.78 (d, *J* = 8.8 Hz, 1H), 6.73 (t, *J* = 3.2 Hz, 1H), 6.65 (d, *J* = 8.4 Hz, 1H), 6.38 (d, *J* = 8.4 Hz, 1H), 5.44 (br, 1H), 4.77 (br, 1H), 3.82 (s, 3H), 2.22 (s, 3H) (-NH<sub>2</sub> protons were not observed); HRMS (ESI) (*m/z*): [M + H]<sup>+</sup> calcd. for C<sub>26</sub>H<sub>24</sub>FN<sub>2</sub>O<sub>2</sub>S, 447.1542; found, 447.1542.

**4-(2-Chloroacetamido)-N-(2-fluorophenyl)-N-((5-(4-methoxy-3-methylphenyl)thiophen-2-yl)methyl)benzamide (**9**)**

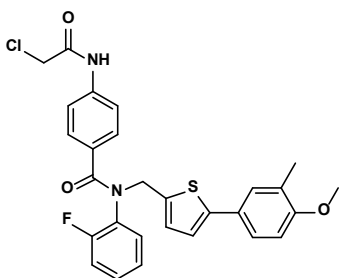

Chloroacetyl chloride (0.05 mL, 0.65 mmol) was slowly added to a solution of compound **8** (0.14 g, 0.32 mmol) and triethylamine (0.14 mL, 0.97 mmol) in CH<sub>2</sub>Cl<sub>2</sub> at 0 °C under argon atmosphere. Reaction mixture was stirred for 12 h slowly rising

to rt. The reaction mixture was diluted with CH<sub>2</sub>Cl<sub>2</sub>, washed with sat. NaHCO<sub>3</sub>, H<sub>2</sub>O, brine, dried over MgSO<sub>4</sub> and evaporated under vacuum to afford a crude product. Purification by flash column chromatography (silica gel, 0–25% EtOAc in hexanes) afforded **9** as a light brown solid (88.0 mg, 51%). <sup>1</sup>H NMR (400 MHz, CDCl<sub>3</sub>) δ 8.19 (s, 1H), 7.39 (s, 4H), 7.35 (s, 2H), 7.19–7.13 (m, 1H), 6.99 (t, *J* = 9.0 Hz, 1H), 6.96–6.92 (m, 3H), 6.80 (d, *J* = 8.0 Hz, 1H), 6.75 (d, *J* = 3.6 Hz, 1H), 5.50 (d, *J* = 14.4 Hz, 1H), 4.79 (d, *J* = 15.6 Hz, 1H), 4.13 (s, 2H), 3.84 (s, 3H), 2.23 (s, 3H); HRMS (ESI) (*m/z*): [M + H]<sup>+</sup> calcd. for C<sub>28</sub>H<sub>25</sub>ClFN<sub>2</sub>O<sub>3</sub>S, 523.1258; found, 523.1251.

**2-((4-((2-Fluorophenyl)((5-(4-methoxy-3-methylphenyl)thiophen-2-yl)methyl)carbamoyl)phenyl)amino)-2-oxoethyl 5-((3a*S*,4*S*,6a*R*)-2-oxohexahydro-1*H*-thieno[3,4-*d*]imidazol-4-yl)pentanoate (**10**) (Biotin-32982 #2)**

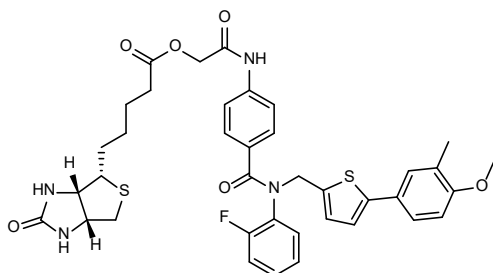

Compound **9** (40.0 mg, 0.08 mmol) was added to a suspension of D-biotin (19.0 mg, 0.08 mmol), cat. KI, and K<sub>2</sub>CO<sub>3</sub> (32.0 mg, 0.23 mmol) in DMF and the reaction mixture was stirred at rt for 12 h under argon atmosphere. The reaction mixture was quenched with H<sub>2</sub>O and extracted with EtOAc. The combined organic layers were washed with brine, dried over MgSO<sub>4</sub> and concentrated. Purification by flash column chromatography (silica gel, 0–5% MeOH in CH<sub>2</sub>Cl<sub>2</sub>) yielded **10** as a white solid (40.0 mg, 36%). mp: 108–110 °C. <sup>1</sup>H NMR (400 MHz, CDCl<sub>3</sub>) δ 8.92 (s, 1H), 7.43 (d, *J* = 8.0 Hz, 2H), 7.36–7.31 (m, 4H), 7.17–7.11 (m, 1H), 6.99–6.92 (m, 4H), 6.79 (d, *J* = 8.4 Hz, 1H), 6.73 (d, *J* = 3.6 Hz, 1H), 6.41 (s, 1H), 5.50 (s, 1H), 5.44 (d, *J* = 14.8 Hz,

1H), 4.79 (d,  $J = 14.8$  Hz, 1H), 4.56 (q,  $J = 11.5$  Hz, 2H), 4.41 (q,  $J = 4.1$  Hz, 1H), 4.22 (q,  $J = 4.1$  Hz, 1H), 3.83 (s, 3H), 3.07 (q,  $J = 6.4$  Hz, 1H), 2.81 (dd,  $J = 12.8, 4.8$  Hz, 1H), 2.64 (d,  $J = 12.8$  Hz, 1H), 2.44–2.35 (m, 2H), 2.22 (s, 3H), 1.69–1.57 (m, 4H), 1.44–1.36 (m, 2H);  $^{13}\text{C}$  NMR (100 MHz,  $\text{CDCl}_3$ )  $\delta$  172.8, 170.3, 165.8, 163.8, 158.6, 157.4, 156.1, 145.0, 139.2, 136.9, 130.9, 130.3, 129.3, 129.2, 128.5, 128.4, 128.1, 126.9, 126.6, 124.64, 124.61, 124.1, 120.9, 118.8, 116.6, 116.4, 110.0, 63.2, 61.7, 60.1, 55.6, 55.4, 48.2, 40.5, 33.2, 27.92, 27.89, 24.6, 16.2;  $^{19}\text{F}$  NMR (376 MHz,  $\text{CDCl}_3$ )  $\delta$  -120.32 (br s, Broad singlet); HRMS (ESI) ( $m/z$ ):  $[\text{M} + \text{H}]^+$  calcd. for  $\text{C}_{38}\text{H}_{40}\text{FN}_4\text{O}_6\text{S}_2$ , 731.2373; found, 731.2374; RP-HPLC purity 99.1% at 254 nm,  $R_t = 18.9$  min.
