# Supplementary material for: AIMP2-DX2 provides therapeutic interface to control KRAS-driven tumorigenesis
Source: PubMed Central journal article supplement (PMC9095880; doi:10.1038/s41467-022-30149-2), 2022-05-11
Supplement: 41467_2022_30149_MOESM6_ESM.pdf [file 41467_2022_30149_MOESM6_ESM.pdf]

## Reporting Summary

Nature Portfolio wishes to improve the reproducibility of the work that we publish. This form provides structure for consistency and transparency in reporting. For further information on Nature Portfolio policies, see our [Editorial Policies](#) and the [Editorial Policy Checklist](#).

### Statistics

For all statistical analyses, confirm that the following items are present in the figure legend, table legend, main text, or Methods section.

- |                                     |                                                                                                                                                                                                                                                                                                |
|-------------------------------------|------------------------------------------------------------------------------------------------------------------------------------------------------------------------------------------------------------------------------------------------------------------------------------------------|
| n/a                                 | Confirmed                                                                                                                                                                                                                                                                                      |
| <input type="checkbox"/>            | <input checked="" type="checkbox"/> The exact sample size ( $n$ ) for each experimental group/condition, given as a discrete number and unit of measurement                                                                                                                                    |
| <input type="checkbox"/>            | <input checked="" type="checkbox"/> A statement on whether measurements were taken from distinct samples or whether the same sample was measured repeatedly                                                                                                                                    |
| <input type="checkbox"/>            | <input checked="" type="checkbox"/> The statistical test(s) used AND whether they are one- or two-sided<br><i>Only common tests should be described solely by name; describe more complex techniques in the Methods section.</i>                                                               |
| <input checked="" type="checkbox"/> | <input type="checkbox"/> A description of all covariates tested                                                                                                                                                                                                                                |
| <input checked="" type="checkbox"/> | <input type="checkbox"/> A description of any assumptions or corrections, such as tests of normality and adjustment for multiple comparisons                                                                                                                                                   |
| <input type="checkbox"/>            | <input checked="" type="checkbox"/> A full description of the statistical parameters including central tendency (e.g. means) or other basic estimates (e.g. regression coefficient) AND variation (e.g. standard deviation) or associated estimates of uncertainty (e.g. confidence intervals) |
| <input type="checkbox"/>            | <input checked="" type="checkbox"/> For null hypothesis testing, the test statistic (e.g. $F$ , $t$ , $r$ ) with confidence intervals, effect sizes, degrees of freedom and $P$ value noted<br><i>Give <math>P</math> values as exact values whenever suitable.</i>                            |
| <input checked="" type="checkbox"/> | <input type="checkbox"/> For Bayesian analysis, information on the choice of priors and Markov chain Monte Carlo settings                                                                                                                                                                      |
| <input checked="" type="checkbox"/> | <input type="checkbox"/> For hierarchical and complex designs, identification of the appropriate level for tests and full reporting of outcomes                                                                                                                                                |
| <input checked="" type="checkbox"/> | <input type="checkbox"/> Estimates of effect sizes (e.g. Cohen's $d$ , Pearson's $r$ ), indicating how they were calculated                                                                                                                                                                    |

*Our web collection on [statistics for biologists](#) contains articles on many of the points above.*

### Software and code

Policy information about [availability of computer code](#)

- |                 |                                                                                                                                                                                                                                                                                                                                                                                                                                                                                                    |
|-----------------|----------------------------------------------------------------------------------------------------------------------------------------------------------------------------------------------------------------------------------------------------------------------------------------------------------------------------------------------------------------------------------------------------------------------------------------------------------------------------------------------------|
| Data collection | Discovery Studio (DS) 2018 software, CHARMM-GUI program (version 2.0), CHARMM General Force Field (CGenFF) program (version 1.0.0) were used for molecular dynamics (MD) simulation system preparation. GROMACS software (version 2016) with charmm36 force field, and the Plumed plugin version 2.4 were used to acquire MD simulation trajectory. Nosé-Hoover thermostat, Parrinello-Rahman barostat, Particle Mesh Ewald (PME) method, LINCS algorithm are implemented in the GROMACS software. |
| Data analysis   | ZDOCK protein-protein docking simulation of Discovery Studio (DS) 2018 software was used to generate initial structure. Discovery Studio (DS) 2018 software was used for graphical representation. For recording movie of MD trajectory, Visual Molecular Dynamics (VMD) program (version 1.9.4a12) was used. GROMACS software (version 2016) was used to measure root-mean-square deviation (RMSD), distance, energy.                                                                             |

For manuscripts utilizing custom algorithms or software that are central to the research but not yet described in published literature, software must be made available to editors and reviewers. We strongly encourage code deposition in a community repository (e.g. GitHub). See the Nature Portfolio [guidelines for submitting code & software](#) for further information.

### Data

Policy information about [availability of data](#)

All manuscripts must include a [data availability statement](#). This statement should provide the following information, where applicable:

- Accession codes, unique identifiers, or web links for publicly available datasets
- A description of any restrictions on data availability
- For clinical datasets or third party data, please ensure that the statement adheres to our [policy](#)

All data are available within this article and the Supplementary Information files. The mass spectrometry proteomics data generated in this study have been deposited in the ProteomeXchange Consortium via the PRIDE partner repository under accession code PXD029839. Source data are provided with this paper.

## Field-specific reporting

Please select the one below that is the best fit for your research. If you are not sure, read the appropriate sections before making your selection.

Life sciences  Behavioural & social sciences  Ecological, evolutionary & environmental sciences

For a reference copy of the document with all sections, see [nature.com/documents/nr-reporting-summary-flat.pdf](https://www.nature.com/documents/nr-reporting-summary-flat.pdf)

## Life sciences study design

All studies must disclose on these points even when the disclosure is negative.

|                 |                                                                                                                                                                                                                                                                                                                                                                                                                                                                                                                                                                                                                                                                                                                                          |
|-----------------|------------------------------------------------------------------------------------------------------------------------------------------------------------------------------------------------------------------------------------------------------------------------------------------------------------------------------------------------------------------------------------------------------------------------------------------------------------------------------------------------------------------------------------------------------------------------------------------------------------------------------------------------------------------------------------------------------------------------------------------|
| Sample size     | For animal experiments, the rationale for analyzing multiple cells/fields from 4-6 biologically independent mice in each group (exact numbers mentioned in figure legends) was based on a resource efficient strategy common across relevant publications (Karkampouna et al. 2021 Nat Commun, PMID: 33602919; Harney et al. 2015 Cancer Disc, PMID: 26269515; Karagiannis et al. 2017 Sci Transl Med, PMID: 28679654). For all other experiments, cells/fields measurement were made in at least 3 biologically independent replicates and is also common across relevant publications (Adhikari et al. 2021 Nat Commun, PMID: 34504076; Karkampouna et al. 2021 Nat Commun, PMID: 33602919; Lito et al. 2016 Science, PMID: 26841430). |
| Data exclusions | No data were excluded.                                                                                                                                                                                                                                                                                                                                                                                                                                                                                                                                                                                                                                                                                                                   |
| Replication     | All experiments were repeated independently with similar results for at least three times.                                                                                                                                                                                                                                                                                                                                                                                                                                                                                                                                                                                                                                               |
| Randomization   | All the samples except for immunoblotting were randomized. Independent experiments like immunoblotting cannot be randomized because number of sample for immunoblotting per experiment was only one, but the experiments were independently repeated three times with similar results.                                                                                                                                                                                                                                                                                                                                                                                                                                                   |
| Blinding        | All the sample preparation except for immunoblotting were blinded. Independent experiments like immunoblotting cannot be blinded because number of sample for immunoblotting per experiment was only one, but the experiments were independently repeated three times with similar results.                                                                                                                                                                                                                                                                                                                                                                                                                                              |

## Reporting for specific materials, systems and methods

We require information from authors about some types of materials, experimental systems and methods used in many studies. Here, indicate whether each material, system or method listed is relevant to your study. If you are not sure if a list item applies to your research, read the appropriate section before selecting a response.

### Materials & experimental systems

| n/a                                 | Involvement in the study                                        |
|-------------------------------------|-----------------------------------------------------------------|
| <input type="checkbox"/>            | <input checked="" type="checkbox"/> Antibodies                  |
| <input type="checkbox"/>            | <input checked="" type="checkbox"/> Eukaryotic cell lines       |
| <input checked="" type="checkbox"/> | <input type="checkbox"/> Palaeontology and archaeology          |
| <input type="checkbox"/>            | <input checked="" type="checkbox"/> Animals and other organisms |
| <input type="checkbox"/>            | <input checked="" type="checkbox"/> Human research participants |
| <input checked="" type="checkbox"/> | <input type="checkbox"/> Clinical data                          |
| <input checked="" type="checkbox"/> | <input type="checkbox"/> Dual use research of concern           |

### Methods

| n/a                                 | Involvement in the study                        |
|-------------------------------------|-------------------------------------------------|
| <input checked="" type="checkbox"/> | <input type="checkbox"/> ChIP-seq               |
| <input checked="" type="checkbox"/> | <input type="checkbox"/> Flow cytometry         |
| <input checked="" type="checkbox"/> | <input type="checkbox"/> MRI-based neuroimaging |

## Antibodies

### Antibodies used

Anti-DX2 (Mouse), 1:1000, Curebio, NMS-02-0012, 115  
 Anti-AIMP2 (Mouse), 1:1000, Curebio, NMS-02-0011  
 Anti-FLAG (Mouse), 1:5000, Sigma, F3165, clone M2  
 Anti-Actin (Mouse), 1:5000, Sigma, A1978, clone AC-15  
 Anti-pan-RAS (Mouse), 1:1000, Sigma, MABS195, clone RAS 10  
 Anti-Strep (murine monoclonal antibody for detection of Strep-tag and coupled to horseradish peroxidase (HRP)), 1:10000, IBA, 2-1509-001  
 Anti-RCE1 (Rabbit), 1:500, Novus Biologicals, NBP1-59922  
 Anti-KRAS (Rabbit), 1:50, Novus Biologicals, NBP2-33579  
 Anti-p14ARF (Mouse), 1:500, Merck, MAB3782, clone 4C6/4  
 Anti-HRAS (Rabbit), 1:500, Thermo Fisher Scientific, 18295-1-AP  
 Anti-PRDX1 (Rabbit), 1:1000, Thermo Fisher Scientific, PA3-750  
 Anti-p-ERK (Rabbit), 1:1000, Cell Signaling Technology, #9101  
 Anti-ERK (Rabbit), 1:1000, Cell Signaling Technology, #4695, 137F5  
 Anti-p-Akt (Rabbit), 1:1000, Cell Signaling Technology, #4060, D9E  
 Anti-Akt (Rabbit), 1:1000, Cell Signaling Technology, #9272

Anti-EGFR (Rabbit), 1:1000, Cell Signaling Technology, #4267, D38B1  
 Anti-p-EGFR (Rabbit), 1:1000, Cell Signaling Technology, #3777, D7A5  
 Anti-cleaved caspase-3 (Rabbit), 1:1000, Cell Signaling Technology, #9661  
 Anti-KRAS (Mouse), 1:500, Santa Cruz Biotechnology, sc-30, F234  
 Anti-GFP (Mouse), 1:1000, Santa Cruz Biotechnology, sc-9996, B-2  
 Anti-HSP90 (Mouse), 1:1000, Santa Cruz Biotechnology, sc-13119, F-8  
 Anti-pan-cadherin (Mouse), 1:500, Santa Cruz Biotechnology, sc-515872, E-11  
 Anti-Smurf2 (Mouse), 1:500, Santa Cruz Biotechnology, sc-518164, C-5  
 Anti-ubiquitin (Mouse), 1:500, Santa Cruz Biotechnology, sc-53509, P4G7  
 Anti-HA (Mouse), 1:1000, Santa Cruz Biotechnology, sc-7392, F-7  
 Anti-myc (Mouse), 1:1000, Santa Cruz Biotechnology, sc-40, 9E10  
 Anti-HSP70 (Mouse), 1:1000, Santa Cruz Biotechnology, sc-24, W27  
 Anti-YY1 (Mouse), 1:1000, Santa Cruz Biotechnology, sc-7341, H-10  
 Anti-E-cadherin (Mouse), 1:500, Santa Cruz Biotechnology, sc-8426, G-10

## Validation

All the antibodies used in this work have been validated by the companies where these antibodies were purchased from, by western blot using human and mouse cell lysates samples.

## Eukaryotic cell lines

### Policy information about [cell lines](#)

## Cell line source(s)

COLO-205, HCT-8, KM-12, SNU-C4, SW-403, NCI-H747, SNU-407, NCI-H1666, NCI-H1650, Calu-6, NCI-H441, HCC-1588, and SNU-410 cell lines were purchased from the Korean Cell Line Bank.  
 CCD18CO, HCT-116, DLD-1, LoVo, WI-26, H460, AsPC-1, Panc10.05, BxPC3, SU.86.86, CFPAC-1, MIA-PaCa2, H69, WI-38, HCC44, H1975, HCC2108, H1299, H1792, H226, A549, HCC827, H520, CaCo2, Panc1, 293T, and CHO-K1 cell lines were obtained from the BioBank of Medicinal Bioconvergence Research Center (Biocon).  
 Lysates of HeLa cells in which the KRAS gene was knocked out using CRISPR/Cas9 were purchased from Abcam

## Authentication

Short tandem repeat profiling was used for authentication.

## Mycoplasma contamination

All the used cell lines were negative for mycoplasma contamination.

Commonly misidentified lines  
(See [ICLAC](#) register)

No misidentified cell lines were used.

## Animals and other organisms

### Policy information about [studies involving animals](#); [ARRIVE guidelines](#) recommended for reporting animal research

## Laboratory animals

7-week-old female BALB/cSLC-nu/nu and 1-month-old female CAG-rTA3; ROSA<sup>h</sup>DX2/+ transgenic mice were used in this study. Mice were housed under ambient temperature of 24 ± 2 °C, circulating air, constant humidity of 50 ± 10% and a 12 h:12 h light/dark cycle.

## Wild animals

No wild animals.

## Field-collected samples

No field-collected samples.

## Ethics oversight

Animal experiments were in compliance with the University Animal Care and Use Committee guidelines at Seoul National University.

Note that full information on the approval of the study protocol must also be provided in the manuscript.

## Human research participants

### Policy information about [studies involving human research participants](#)

## Population characteristics

Ninety-nine colorectal cancer and matched normal tissue samples for patients whom undergone colorectal cancer surgery at Severance Hospital were analyzed. All patients were pathologically confirmed adenocarcinoma of the colon and rectum without preoperative treatment. Among 99 patients, 51 (51.5%) were male, and the mean age was 58.9.

## Recruitment

Ninety-nine non-metastatic colorectal cancer patients without preoperative treatment who received elective colorectal cancer surgery between 2015 and 2016 at Severance Hospital were enrolled. There was no selection bias in the inclusion and exclusion criteria.

## Ethics oversight

Severance Hospital Yonsei University Health System Institutional Review Board (4-2016-0406)

Note that full information on the approval of the study protocol must also be provided in the manuscript.
